# Supplementary material for: Identifying quality indicators for prehospital emergency care services in the low to middle income setting: The South African perspective
Source: PubMed Central journal article supplement — Afr J Emerg Med. 2019 Aug 6;9(4):185–92. doi: 10.1016/j.afjem.2019.07.003 (PMC6933208; doi:10.1016/j.afjem.2019.07.003), 2019-08-06
Supplement: mmc1.pdf [file mmc1.pdf]

Development of Clinical Quality and Performance  
Indicators for Emergency Medical Services in the Low  
to Middle Income Setting: The South African  
perspective

Data Dictionary and Minimum Data Standards  
(V3 2019)

## **Contents**

### **Abbreviations**

### **Background**

Scope

Purpose

### **Component definitions**

#### **Section 1: Clinical Category**

Part 1: Acute Coronary Syndromes/ST Elevation Myocardial Infarction

Part 2: Acute Pulmonary Oedema

Part 3: Airway Management

Part 4: Anaphylaxis

Part 5: Asthma/Bronchoconstriction

Part 6: Burns

Part 7: General

Part 8: Hypoglycaemia

Part 9: Neonates/Paediatrics

Part 10: Obstetrics

Part 11: Out of Hospital Cardiac Arrest

Part 12: Pain Management

Part 13: Seizures

Part 14: Stroke/CVA/TIA

Part 15: Trauma

#### **Section 2: Non-clinical Category**

Part 1: Adverse/Sentinel Events

Part 2: Communications

## Abbreviations

**ACS** – Acute Coronary Syndrome  
**AED** – Automated External Defibrillator  
**ALS** – Advanced Life Support  
**APGAR** – Activity, Pulse, Grimace, Appearance, Respiration  
**APO** – Acute Pulmonary Oedema  
**BBA** – Born before arrival  
**BP** – Blood pressure  
**CPD** – Continued professional development  
**CPR** – Cardiopulmonary resuscitation  
**CT** – Computed tomography  
**CVA** – Cerebrovascular accident  
**ECG** – Electrocardiogram  
**EMS** – Emergency Medical Service  
**EtCO<sub>2</sub>** – End tidal carbon dioxide  
**ETI** – Endotracheal intubation  
**ETT** – Endotracheal tube  
**FAST** – Face Arm Speech Time  
**GCS** – Glasgow Coma Scale  
**GTN** – Glyceryl trinitrate  
**HEMS** – Helicopter Emergency Medical Service  
**IO** – Intra-osseous  
**IOD** – Injury on duty  
**IV** – Intra-venous  
**MAP** – Mean arterial pressure  
**mmHg** – Millimetres mercury  
**ODD** – Oesophageal detection device  
**OHCA** – Out of hospital cardiac arrest  
**PCI** – Percutaneous coronary intervention  
**PEA** – Pulseless electrical activity  
**PEFR** – Peak expiratory flow rate  
**POC** – Point of care  
**ROSC** – Return of spontaneous circulation  
**RSI** – Rapid sequence intubation  
**SPC** – Statistical process control  
**SpO<sub>2</sub>** – Capillary oxygen saturation  
**STEMI** – ST elevation myocardial infarction  
**TIA** – Transient ischaemic attack  
**TXA** – Tranexamic acid  
**VF** – Ventricular fibrillation  
**VT** – Ventricular tachycardia

## Background

Information plays a pivotal role in promoting improvements in the safety and quality of patient care. Quality and performance measurement promote accountability to all stakeholders including the public, service users, clinicians and the Government by facilitating informed decision-making and safe, high quality and reliable care through monitoring, analysing and communicating the degree to which healthcare organisations meet key goals. Accurate performance measurement is dependent on information that is of good quality, comparable, and can be shared within the health sector. Quality Indicators (QIs) play an important role in the performance measurement process by helping to identify and appropriately measure levels of service quality and performance.

In and of themselves, QIs cannot improve quality, however, they effectively act as flags or alerts to identify good practice, provide comparability within and between similar services, where there are opportunities for improvement and where a more detailed investigation of standards is warranted. The ultimate goal of QIs is to contribute to the provision of a high quality, safe and effective service that meets the needs of service users. Data used to support QIs should be standardised, with uniform definitions, to ensure that it is collected consistently and that it supports the measurement process, facilitating meaningful comparison. This can be achieved through the development of a minimum data set (MDS) containing a list of standardised data to support performance measurement with QIs. The purpose of this document is to provide guidance for the development of QIs and associated MDSs to monitor healthcare quality.

The methodology used in the development of the QIs described in this document is outlined in Figure 1, reprinted with permission by the National Quality Forum (Copyright ©2013 National Quality Forum).

### Scope

The purpose of this study is to identify a series of QIs applicable to the South African EMS context. The outcome will provide services across the country with a pool of QIs that can be referenced for the purposes of monitoring quality and performance and identifying areas for improvement.

The indicators defined in this document have been developed following a review of the scientific literature, supplemented by input from experts in prehospital quality from the USA, UK and South Africa. Each QI is presented in the same format so as to standardize data capture and monitoring (See Table 1)

**Figure 1: QI development methodology**

NATIONAL QUALITY FORUM Understanding Performance Measures: Anatomy and Types

**WHAT IS A PERFORMANCE MEASURE?**

A healthcare performance measure is a way to calculate whether and how often the health and healthcare system does what it should.

Measures are based on scientific evidence about **processes, outcomes, perceptions, or systems** that relate to high-quality care.

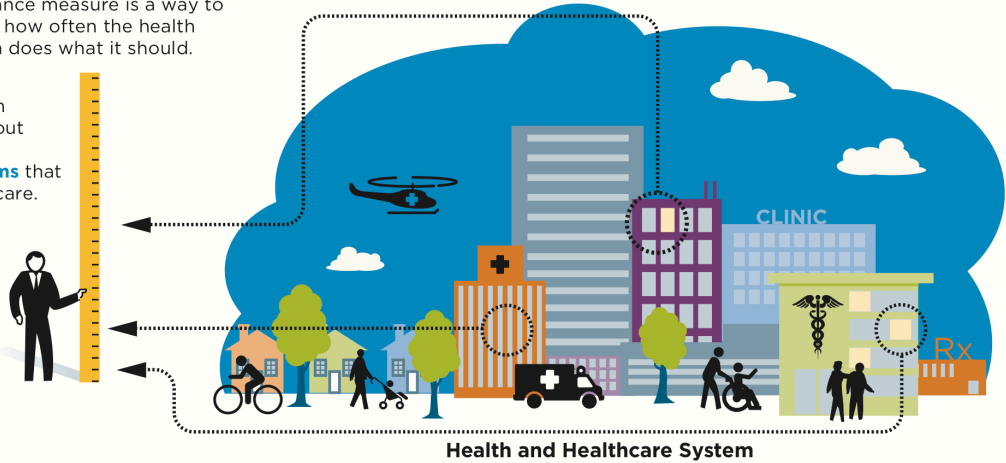

**CONSTRUCTING A MEASURE**

The result of a measure is usually shown as a ratio or a percentage, and allows for comparison to other providers and benchmarking against national and local performance.

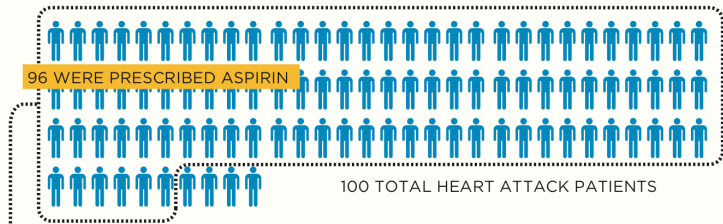

**MEASURE FORMULA**

$$\frac{\text{NUMERATOR}}{\text{DENOMINATOR}} = \text{RESULT} \%$$

NUMERATOR: # WHO HAD A SPECIFIC TREATMENT  
DENOMINATOR: # ELIGIBLE FOR TREATMENT

**MEASURE EXAMPLE**

$$\frac{96 \text{ HEART ATTACK PATIENTS WERE APPROPRIATELY PRESCRIBED ASPIRIN AT DISCHARGE}}{100 \text{ TOTAL HEART ATTACK PATIENTS}} = 96\%$$
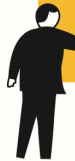

**EXAMPLE:** Once a person has had a heart attack, taking aspirin daily has been shown to reduce the chance of having a second one. Guidelines tell physicians to prescribe aspirin to all patients leaving the hospital after treatment.

**TYPES OF PERFORMANCE MEASURES**

**STRUCTURAL MEASURES**

ASSESS HEALTHCARE INFRASTRUCTURE

EXAMPLE: The percentage of physicians in a practice who have systems to track and follow patients with diabetes.

**PROCESS MEASURES**

ASSESS STEPS THAT SHOULD BE FOLLOWED TO PROVIDE GOOD CARE

EXAMPLE: The percentage of patients with diabetes who have had an annual eye exam in the last year.

**OUTCOME MEASURES**

ASSESS THE RESULTS OF HEALTHCARE THAT ARE EXPERIENCED BY PATIENTS

EXAMPLE: The percentage of diabetes patients who are blind or have compromised vision.

**Table 1: Data definitions**

|                                   |                                                                                                                       |
|-----------------------------------|-----------------------------------------------------------------------------------------------------------------------|
| <b>Definition</b>                 | Basic description/purpose of the QI                                                                                   |
| <b>Category</b>                   | Primary area of focus of the QI                                                                                       |
| <b>Subcategory</b>                | Secondary area, within the Category that the QI is focused                                                            |
| <b>Measure Type</b>               | Structure, process or outcome                                                                                         |
| <b>Target Population</b>          | Category level population on whom the quality indicator is measured/applied                                           |
| <b>Unit of Analysis</b>           | EMS component under study/assessment for quality and performance                                                      |
| <b>Numerator Statement</b>        | Description of the subset of the Subcategory population on whom the quality indicator is measured/applied             |
| <b>Denominator Statement</b>      | Description of the Subcategory level of population on whom the quality indicator is measured/applied                  |
| <b>Case Mix/Risk Adjustment</b>   | Suggested differentiation amongst the denominator population for greater accuracy (i.e.: stratification)              |
| <b>Exclusion Criteria</b>         | Denominator cases to be excluded when applying the QI                                                                 |
| <b>Measure Calculation</b>        | The equation for calculating the QI                                                                                   |
| <b>Numerical Reporting Format</b> | Suggested format in which the numerical results should be reported                                                    |
| <b>Graphical Reporting Format</b> | Suggested format in which the results should be displayed/visualised                                                  |
| <b>Reported Indicator</b>         | Suggested output in which results should be described                                                                 |
| <b>Data Source</b>                | Suggested data source to obtain the data required for calculating the QI                                              |
| <b>Suggested Reporting Period</b> | Time frame, number of successive cases or other grouping strategies cases should be aggregated for reporting purposes |
| <b>Recommended Review Period</b>  | Suggested time period at which the QI should be reviewed for validity and feasibility                                 |

## **Section 1: Clinical Category**

Part 1: Acute Coronary Syndromes/ST Elevation Myocardial Infarction

Part 2: Acute Pulmonary Oedema

Part 3: Airway Management

Part 4: Anaphylaxis

Part 5: Asthma/Bronchoconstriction

Part 6: Burns

Part 7: General

Part 8: Hypoglycaemia

Part 9: Neonates/Paediatrics

Part 10: Obstetrics

Part 11: Out of Hospital Cardiac Arrest

Part 12: Pain Management

Part 13: Seizures

Part 14: Stroke/CVA/TIA

Part 15: Trauma

## **Section 1: Clinical Category**

### **Part 1: Acute Coronary Syndromes/ST Elevation Myocardial Infarction**

- C-AS-P-1 Patients with a provisional diagnosis of ACS/STEMI who had an ALS practitioner in attendance
- C-AS-P-2 Patients with a provisional diagnosis of ACS/STEMI who had a set of defined cardiac risk factors assessed and recorded
- C-AS-P-3 Patients with a provisional diagnosis of ACS/STEMI who had a 12 lead ECG obtained
- C-AS-P-4 Patients with a provisional diagnosis of ACS/STEMI who were administered Aspirin
- C-AS-P-5 Patients with a provisional diagnosis of ACS/STEMI who were administered GTN
- C-AS-P-6 Patients with a provisional diagnosis of ACS/STEMI who were assessed for suitability for thrombolysis by defined checklist
- C-AS-P-7 Patients with a provisional diagnosis of ACS/STEMI who were administered prehospital thrombolysis
- C-AS-P-8 Patients with a provisional diagnosis of ACS/STEMI who were transported directly to a Facility with PCI capabilities
- C-AS-P-9 Patients with a provisional diagnosis of ACS/STEMI who had EMS activation of the receiving Cath lab
- C-AS-P-10 Patients who received/met all components of a defined ACS/STEMI composite bundle score  
(A bundle indicator is a grouped indicator composed of several individual indicators - to be defined at the user's discretion)



## C-AS-P-1 Patients with a provisional diagnosis of ACS/STEMI who had an ALS practitioner in attendance

| Measure Code                      | C-AS-P-1                                                                                                     |
|-----------------------------------|--------------------------------------------------------------------------------------------------------------|
| <b>Definition</b>                 | Patients with a provisional diagnosis of ACS/STEMI who had an ALS practitioner in attendance                 |
| <b>Category</b>                   | Clinical                                                                                                     |
| <b>Subcategory</b>                | ACS/STEMI                                                                                                    |
| <b>Measure Type</b>               | Process                                                                                                      |
| <b>Target Population</b>          | Adult patients<br>Medical patients                                                                           |
| <b>Unit of Analysis</b>           | Clinician<br>Shift<br>Base<br>Service                                                                        |
| <b>Numerator Statement</b>        | Total number of patients with a provisional diagnosis of ACS/STEMI who had an ALS practitioner in attendance |
| <b>Denominator Statement</b>      | Total number of patients transported by EMS personnel with a provisional diagnosis of ACS/STEMI              |
| <b>Case Mix/Risk Adjustment</b>   | Primary (Community) calls<br>Secondary (Transfer) calls                                                      |
| <b>Exclusion Criteria</b>         | Paediatric patients<br>Insufficient reporting data                                                           |
| <b>Measure Calculation</b>        | Numerator/Denominator X 100 = %                                                                              |
| <b>Numerical Reporting Format</b> | Percentage (%)                                                                                               |
| <b>Graphical Reporting Format</b> | Run chart (min 10 data points)<br>SPC chart (min 20 data points)                                             |
| <b>Reported Indicator</b>         | % Patients with a provisional diagnosis of ACS/STEMI who had an ALS practitioner in attendance               |
| <b>Data Source</b>                | Patient Report Form                                                                                          |
| <b>Suggested Reporting Period</b> | Monthly<br>Quarterly<br>Annually                                                                             |
| <b>Recommended Review Period</b>  | Three years                                                                                                  |

## C-AS-P-2 Patients with a provisional diagnosis of ACS/STEMI who had a set of defined cardiac risk factors assessed and recorded

| Measure Code                      | C-AS-P-2                                                                                                                               |
|-----------------------------------|----------------------------------------------------------------------------------------------------------------------------------------|
| <b>Definition</b>                 | Patients with a provisional diagnosis of ACS/STEMI who had a set of defined cardiac risk factors assessed and recorded                 |
| <b>Category</b>                   | Clinical                                                                                                                               |
| <b>Subcategory</b>                | ACS/STEMI                                                                                                                              |
| <b>Measure Type</b>               | Process                                                                                                                                |
| <b>Target Population</b>          | Adult patients<br>Medical patients                                                                                                     |
| <b>Unit of Analysis</b>           | Clinician<br>Shift<br>Base<br>Service                                                                                                  |
| <b>Numerator Statement</b>        | Total number of patients with a provisional diagnosis of ACS/STEMI who had a set of defined cardiac risk factors assessed and recorded |
| <b>Denominator Statement</b>      | Total number of patients transported by EMS personnel with a provisional diagnosis of ACS/STEMI                                        |
| <b>Case Mix/Risk Adjustment</b>   | Primary (Community) calls<br>Secondary (Transfer) calls                                                                                |
| <b>Exclusion Criteria</b>         | Paediatric patients<br>Insufficient reporting data                                                                                     |
| <b>Measure Calculation</b>        | Numerator/Denominator X 100 = %                                                                                                        |
| <b>Numerical Reporting Format</b> | Percentage (%)                                                                                                                         |
| <b>Graphical Reporting Format</b> | Run chart (min 10 data points)<br>SPC chart (min 20 data points)                                                                       |
| <b>Reported Indicator</b>         | % Patients with a provisional diagnosis of ACS/STEMI who had a set of defined cardiac risk factors assessed and recorded               |
| <b>Data Source</b>                | Patient Report Form                                                                                                                    |
| <b>Suggested Reporting Period</b> | Monthly<br>Quarterly<br>Annually                                                                                                       |
| <b>Recommended Review Period</b>  | Three years                                                                                                                            |

### C-AS-P-3 Patients with a provisional diagnosis of ACS/STEMI who had a 12 lead ECG obtained

| Measure Code                      | C-AS-P-3                                                                                          |
|-----------------------------------|---------------------------------------------------------------------------------------------------|
| <b>Definition</b>                 | Patients with a provisional diagnosis of ACS/STEMI who had a 12 lead ECG obtained                 |
| <b>Category</b>                   | Clinical                                                                                          |
| <b>Subcategory</b>                | ACS/STEMI                                                                                         |
| <b>Measure Type</b>               | Process                                                                                           |
| <b>Target Population</b>          | Adult patients<br>Medical patients                                                                |
| <b>Unit of Analysis</b>           | Clinician<br>Shift<br>Base<br>Service                                                             |
| <b>Numerator Statement</b>        | Total number of patients with a provisional diagnosis of ACS/STEMI who had a 12 lead ECG obtained |
| <b>Denominator Statement</b>      | Total number of patients transported by EMS personnel with a provisional diagnosis of ACS/STEMI   |
| <b>Case Mix/Risk Adjustment</b>   | Primary (Community) calls<br>Secondary (Transfer) calls                                           |
| <b>Exclusion Criteria</b>         | Paediatric patients<br>12 lead ECG monitoring not available<br>Insufficient reporting data        |
| <b>Measure Calculation</b>        | Numerator/Denominator X 100 = %                                                                   |
| <b>Numerical Reporting Format</b> | Percentage (%)                                                                                    |
| <b>Graphical Reporting Format</b> | Run chart (min 10 data points)<br>SPC chart (min 20 data points)                                  |
| <b>Reported Indicator</b>         | % Patients with a provisional diagnosis of ACS/STEMI who had a 12 lead ECG obtained               |
| <b>Data Source</b>                | Patient Report Form                                                                               |
| <b>Suggested Reporting Period</b> | Monthly<br>Quarterly<br>Annually                                                                  |
| <b>Recommended Review Period</b>  | Three years                                                                                       |

## C-AS-P-4 Patients with a provisional diagnosis of ACS/STEMI who were administered Aspirin

| Measure Code                      | C-AS-P-4                                                                                         |
|-----------------------------------|--------------------------------------------------------------------------------------------------|
| <b>Definition</b>                 | Patients with a provisional diagnosis of ACS/STEMI who were administered Aspirin                 |
| <b>Category</b>                   | Clinical                                                                                         |
| <b>Subcategory</b>                | ACS/STEMI                                                                                        |
| <b>Measure Type</b>               | Process                                                                                          |
| <b>Target Population</b>          | Adult patients<br>Medical patients                                                               |
| <b>Unit of Analysis</b>           | Clinician<br>Shift<br>Base<br>Service                                                            |
| <b>Numerator Statement</b>        | Total number of patients with a provisional diagnosis of ACS/STEMI who were administered Aspirin |
| <b>Denominator Statement</b>      | Total number of patients transported by EMS personnel with a provisional diagnosis of ACS/STEMI  |
| <b>Case Mix/Risk Adjustment</b>   | Primary (Community) calls<br>Secondary (Transfer) calls                                          |
| <b>Exclusion Criteria</b>         | Paediatric patients<br>Contraindication to Aspirin<br>Insufficient reporting data                |
| <b>Measure Calculation</b>        | Numerator/Denominator X 100 = %                                                                  |
| <b>Numerical Reporting Format</b> | Percentage (%)                                                                                   |
| <b>Graphical Reporting Format</b> | Run chart (min 10 data points)<br>SPC chart (min 20 data points)                                 |
| <b>Reported Indicator</b>         | % Patients with a provisional diagnosis of ACS/STEMI who were administered Aspirin               |
| <b>Data Source</b>                | Patient Report Form                                                                              |
| <b>Suggested Reporting Period</b> | Monthly<br>Quarterly<br>Annually                                                                 |
| <b>Recommended Review Period</b>  | Three years                                                                                      |

## C-AS-P-5 Patients with a provisional diagnosis of ACS/STEMI who were administered GTN

| Measure Code                      | C-AS-P-5                                                                                        |
|-----------------------------------|-------------------------------------------------------------------------------------------------|
| <b>Definition</b>                 | Patients with a provisional diagnosis of ACS/STEMI who were administered GTN                    |
| <b>Category</b>                   | Clinical                                                                                        |
| <b>Subcategory</b>                | ACS/STEMI                                                                                       |
| <b>Measure Type</b>               | Process                                                                                         |
| <b>Target Population</b>          | Adult patients<br>Medical patients                                                              |
| <b>Unit of Analysis</b>           | Clinician<br>Shift<br>Base<br>Service                                                           |
| <b>Numerator Statement</b>        | Total number of patients with a provisional diagnosis of ACS/STEMI who were administered GTN    |
| <b>Denominator Statement</b>      | Total number of patients transported by EMS personnel with a provisional diagnosis of ACS/STEMI |
| <b>Case Mix/Risk Adjustment</b>   | Primary (Community) calls<br>Secondary (Transfer) calls                                         |
| <b>Exclusion Criteria</b>         | Paediatric patients<br>Contraindication to GTN<br>Insufficient reporting data                   |
| <b>Measure Calculation</b>        | Numerator/Denominator X 100 = %                                                                 |
| <b>Numerical Reporting Format</b> | Percentage (%)                                                                                  |
| <b>Graphical Reporting Format</b> | Run chart (min 10 data points)<br>SPC chart (min 20 data points)                                |
| <b>Reported Indicator</b>         | % Patients with a provisional diagnosis of ACS/STEMI who were administered GTN                  |
| <b>Data Source</b>                | Patient Report Form                                                                             |
| <b>Suggested Reporting Period</b> | Monthly<br>Quarterly<br>Annually                                                                |
| <b>Recommended Review Period</b>  | Three years                                                                                     |

## C-AS-P-6 Patients with a provisional diagnosis of ACS/STEMI who were assessed for suitability for thrombolysis by defined checklist

| Measure Code                      | C-AS-P-6                                                                                                                                   |
|-----------------------------------|--------------------------------------------------------------------------------------------------------------------------------------------|
| <b>Definition</b>                 | Patients with a provisional diagnosis of ACS/STEMI who were assessed for suitability for thrombolysis by defined checklist                 |
| <b>Category</b>                   | Clinical                                                                                                                                   |
| <b>Subcategory</b>                | ACS/STEMI                                                                                                                                  |
| <b>Measure Type</b>               | Process                                                                                                                                    |
| <b>Target Population</b>          | Adult patients<br>Medical patients                                                                                                         |
| <b>Unit of Analysis</b>           | Clinician<br>Shift<br>Base<br>Service                                                                                                      |
| <b>Numerator Statement</b>        | Total number of patients with a provisional diagnosis of ACS/STEMI who were assessed for suitability for thrombolysis by defined checklist |
| <b>Denominator Statement</b>      | Total number of patients transported by EMS personnel with a provisional diagnosis of ACS/STEMI                                            |
| <b>Case Mix/Risk Adjustment</b>   | Primary (Community) calls<br>Secondary (Transfer) calls                                                                                    |
| <b>Exclusion Criteria</b>         | Paediatric patients<br>Insufficient reporting data                                                                                         |
| <b>Measure Calculation</b>        | Numerator/Denominator X 100 = %                                                                                                            |
| <b>Numerical Reporting Format</b> | Percentage (%)                                                                                                                             |
| <b>Graphical Reporting Format</b> | Run chart (min 10 data points)<br>SPC chart (min 20 data points)                                                                           |
| <b>Reported Indicator</b>         | % Patients transported by EMS personnel with a provisional diagnosis of ACS/STEMI                                                          |
| <b>Data Source</b>                | Patient Report Form                                                                                                                        |
| <b>Suggested Reporting Period</b> | Monthly<br>Quarterly<br>Annually                                                                                                           |
| <b>Recommended Review Period</b>  | Three years                                                                                                                                |

## C-AS-P-7 Patients with a provisional diagnosis of ACS/STEMI who were administered prehospital thrombolysis

| Measure Code                      | C-AS-P-7                                                                                                                                                                            |
|-----------------------------------|-------------------------------------------------------------------------------------------------------------------------------------------------------------------------------------|
| <b>Definition</b>                 | Patients with a provisional diagnosis of ACS/STEMI who were administered prehospital thrombolysis                                                                                   |
| <b>Category</b>                   | Clinical                                                                                                                                                                            |
| <b>Subcategory</b>                | ACS/STEMI                                                                                                                                                                           |
| <b>Measure Type</b>               | Process                                                                                                                                                                             |
| <b>Target Population</b>          | Adult patients<br>Medical patients                                                                                                                                                  |
| <b>Unit of Analysis</b>           | Clinician<br>Shift<br>Base<br>Service                                                                                                                                               |
| <b>Numerator Statement</b>        | Total number of patients with a provisional diagnosis of ACS/STEMI who were administered prehospital thrombolysis                                                                   |
| <b>Denominator Statement</b>      | Total number of patients transported by EMS personnel with a provisional diagnosis of ACS/STEMI found to be suitable for thrombolysis administration by defined assessment criteria |
| <b>Case Mix/Risk Adjustment</b>   | Primary (Community) calls<br>Secondary (Transfer) calls                                                                                                                             |
| <b>Exclusion Criteria</b>         | Paediatric patients<br>Patient not suitable for thrombolysis<br>Contraindication to thrombolytic<br>Insufficient reporting data                                                     |
| <b>Measure Calculation</b>        | Numerator/Denominator X 100 = %                                                                                                                                                     |
| <b>Numerical Reporting Format</b> | Percentage (%)                                                                                                                                                                      |
| <b>Graphical Reporting Format</b> | Run chart (min 10 data points)<br>SPC chart (min 20 data points)                                                                                                                    |
| <b>Reported Indicator</b>         | % Patients with a provisional diagnosis of ACS/STEMI who were administered prehospital thrombolysis                                                                                 |
| <b>Data Source</b>                | Patient Report Form                                                                                                                                                                 |
| <b>Suggested Reporting Period</b> | Monthly<br>Quarterly<br>Annually                                                                                                                                                    |
| <b>Recommended Review Period</b>  | Three years                                                                                                                                                                         |

## C-AS-P-8 Patients with a provisional diagnosis of ACS/STEMI who were transported directly to a Facility with PCI capabilities

| Measure Code                      | C-AS-P-8                                                                                                                             |
|-----------------------------------|--------------------------------------------------------------------------------------------------------------------------------------|
| <b>Definition</b>                 | Patients with a provisional diagnosis of ACS/STEMI who were transported directly to a Facility with PCI capabilities                 |
| <b>Category</b>                   | Clinical                                                                                                                             |
| <b>Subcategory</b>                | ACS/STEMI                                                                                                                            |
| <b>Measure Type</b>               | Process                                                                                                                              |
| <b>Target Population</b>          | Adult patients<br>Medical patients                                                                                                   |
| <b>Unit of Analysis</b>           | Clinician<br>Shift<br>Base<br>Service                                                                                                |
| <b>Numerator Statement</b>        | Total number of patients with a provisional diagnosis of ACS/STEMI who were transported directly to a Facility with PCI capabilities |
| <b>Denominator Statement</b>      | Total number of patients transported by EMS personnel with a provisional diagnosis of ACS/STEMI                                      |
| <b>Case Mix/Risk Adjustment</b>   | Primary (Community) calls<br>Secondary (Transfer) calls                                                                              |
| <b>Exclusion Criteria</b>         | Paediatric patients<br>Insufficient reporting data                                                                                   |
| <b>Measure Calculation</b>        | Numerator/Denominator X 100 = %                                                                                                      |
| <b>Numerical Reporting Format</b> | Percentage (%)                                                                                                                       |
| <b>Graphical Reporting Format</b> | Run chart (min 10 data points)<br>SPC chart (min 20 data points)                                                                     |
| <b>Reported Indicator</b>         | % Patients with a provisional diagnosis of ACS/STEMI who were transported directly to a Facility with PCI capabilities               |
| <b>Data Source</b>                | Patient Report Form                                                                                                                  |
| <b>Suggested Reporting Period</b> | Monthly<br>Quarterly<br>Annually                                                                                                     |
| <b>Recommended Review Period</b>  | Three years                                                                                                                          |



## C-AS-P-9 Patients with a provisional diagnosis of ACS/STEMI who had EMS activation of the receiving Cath lab

| Measure Code                      | C-AS-P-9                                                                                                            |
|-----------------------------------|---------------------------------------------------------------------------------------------------------------------|
| <b>Definition</b>                 | Patients with a provisional diagnosis of ACS/STEMI who had EMS activation of the receiving Cath lab                 |
| <b>Category</b>                   | Clinical                                                                                                            |
| <b>Subcategory</b>                | ACS/STEMI                                                                                                           |
| <b>Measure Type</b>               | Process                                                                                                             |
| <b>Target Population</b>          | Adult patients<br>Medical patients                                                                                  |
| <b>Unit of Analysis</b>           | Clinician<br>Shift<br>Base<br>Service                                                                               |
| <b>Numerator Statement</b>        | Total number of patients with a provisional diagnosis of ACS/STEMI who had EMS activation of the receiving Cath lab |
| <b>Denominator Statement</b>      | Total number of patients transported by EMS personnel with a provisional diagnosis of ACS/STEMI                     |
| <b>Case Mix/Risk Adjustment</b>   | Primary (Community) calls<br>Secondary (Transfer) calls                                                             |
| <b>Exclusion Criteria</b>         | Paediatric patients<br>Insufficient reporting data<br>No Cath lab facility available                                |
| <b>Measure Calculation</b>        | Numerator/Denominator X 100 = %                                                                                     |
| <b>Numerical Reporting Format</b> | Percentage (%)                                                                                                      |
| <b>Graphical Reporting Format</b> | Run chart (min 10 data points)<br>SPC chart (min 20 data points)                                                    |
| <b>Reported Indicator</b>         | % Patients with a provisional diagnosis of ACS/STEMI who had EMS activation of the receiving Cath lab               |
| <b>Data Source</b>                | Patient Report Form                                                                                                 |
| <b>Suggested Reporting Period</b> | Monthly<br>Quarterly<br>Annually                                                                                    |
| <b>Recommended Review Period</b>  | Three years                                                                                                         |

## C-AS-P-10 Patients who received/met all components of a defined ACS/STEMI composite bundle score

| Measure Code                      | C-AS-P-10                                                                                              |
|-----------------------------------|--------------------------------------------------------------------------------------------------------|
| <b>Definition</b>                 | Patients who received/met all components of a defined ACS/STEMI composite bundle score                 |
| <b>Category</b>                   | Clinical                                                                                               |
| <b>Subcategory</b>                | ACS/STEMI                                                                                              |
| <b>Measure Type</b>               | Process                                                                                                |
| <b>Target Population</b>          | Adult patients<br>Medical patients                                                                     |
| <b>Unit of Analysis</b>           | Clinician<br>Shift<br>Base<br>Service                                                                  |
| <b>Numerator Statement</b>        | Total number of patients who received/met all components of a defined ACS/STEMI composite bundle score |
| <b>Denominator Statement</b>      | Total number of patients transported by EMS personnel with a provisional diagnosis of ACS/STEMI        |
| <b>Case Mix/Risk Adjustment</b>   | Primary (Community) calls<br>Secondary (Transfer) calls                                                |
| <b>Exclusion Criteria</b>         | Paediatric patients<br>Insufficient reporting data                                                     |
| <b>Measure Calculation</b>        | Numerator/Denominator X 100 = %                                                                        |
| <b>Numerical Reporting Format</b> | Percentage (%)                                                                                         |
| <b>Graphical Reporting Format</b> | Run chart (min 10 data points)<br>SPC chart (min 20 data points)                                       |
| <b>Reported Indicator</b>         | % Patients who received/met all components of a defined ACS/STEMI composite bundle score               |
| <b>Data Source</b>                | Patient Report Form                                                                                    |
| <b>Suggested Reporting Period</b> | Monthly<br>Quarterly<br>Annually                                                                       |
| <b>Recommended Review Period</b>  | Three years                                                                                            |

## **Section 1: Clinical Category**

### **Part 2: Acute Pulmonary Oedema**

- C-Apo-P-1 Patients with a provisional diagnosis of APO who were administered GTN
- C-Apo-P-2 Total number of patients with a provisional diagnosis of APO who received CPAP
- C-Apo-P-3 Patients with a provisional diagnosis of APO who had a 12 lead ECG obtained

## C-Apo-P-1 Patients with a provisional diagnosis of APO who were administered GTN

| Measure Code                      | C-Apo-P-1                                                                                 |
|-----------------------------------|-------------------------------------------------------------------------------------------|
| <b>Definition</b>                 | Patients with a provisional diagnosis of APO who were administered GTN                    |
| <b>Category</b>                   | Clinical                                                                                  |
| <b>Subcategory</b>                | Acute pulmonary oedema                                                                    |
| <b>Measure Type</b>               | Process                                                                                   |
| <b>Target Population</b>          | Adult patients<br>Medical patients                                                        |
| <b>Unit of Analysis</b>           | Clinician<br>Shift<br>Base<br>Service                                                     |
| <b>Denominator Statement</b>      | Total number of patients transported by EMS personnel with a provisional diagnosis of APO |
| <b>Case Mix/Risk Adjustment</b>   | Primary (Community) calls<br>Secondary (Transfer) calls                                   |
| <b>Exclusion Criteria</b>         | Paediatric patients<br>Contraindication to GTN<br>Insufficient reporting data             |
| <b>Measure Calculation</b>        | Numerator/Denominator X 100 = %                                                           |
| <b>Numerical Reporting Format</b> | Percentage (%)                                                                            |
| <b>Graphical Reporting Format</b> | Run chart (min 10 data points)<br>SPC chart (min 20 data points)                          |
| <b>Reported Indicator</b>         | % Patients with a provisional diagnosis of APO who were administered GTN                  |
| <b>Data Source</b>                | Patient Report Form                                                                       |
| <b>Suggested Reporting Period</b> | Monthly<br>Quarterly<br>Annually                                                          |
| <b>Recommended Review Period</b>  | Three years                                                                               |

## C-Apo-P-2 Patients with a provisional diagnosis of APO who received CPAP

| Measure Code                      | C-Apo-P-2                                                                                                         |
|-----------------------------------|-------------------------------------------------------------------------------------------------------------------|
| <b>Definition</b>                 | Patients with a provisional diagnosis of APO who received CPAP                                                    |
| <b>Category</b>                   | Clinical                                                                                                          |
| <b>Subcategory</b>                | Acute pulmonary oedema                                                                                            |
| <b>Measure Type</b>               | Process                                                                                                           |
| <b>Target Population</b>          | Adult patients<br>Medical patients                                                                                |
| <b>Unit of Analysis</b>           | Clinician<br>Shift<br>Base<br>Service                                                                             |
| <b>Denominator Statement</b>      | Total number of patients transported by EMS personnel with a provisional diagnosis of APO                         |
| <b>Case Mix/Risk Adjustment</b>   | Primary (Community) calls<br>Secondary (Transfer) calls<br>Drowning/Near-drowning patients                        |
| <b>Exclusion Criteria</b>         | Paediatric patients<br>Contraindication to CPAP administered<br>Intubated patients<br>Insufficient reporting data |
| <b>Measure Calculation</b>        | Numerator/Denominator X 100 = %                                                                                   |
| <b>Numerical Reporting Format</b> | Percentage (%)                                                                                                    |
| <b>Graphical Reporting Format</b> | Run chart (min 10 data points)<br>SPC chart (min 20 data points)                                                  |
| <b>Reported Indicator</b>         | % Total number of patients with a provisional diagnosis of APO who received CPAP                                  |
| <b>Data Source</b>                | Patient Report Form                                                                                               |
| <b>Suggested Reporting Period</b> | Monthly<br>Quarterly<br>Annually                                                                                  |
| <b>Recommended Review Period</b>  | Three years                                                                                                       |

## C-Apo-P-3 Patients with a provisional diagnosis of APO who had a 12 lead ECG obtained

| Measure Code                            | C-Apo-P-3                                                                                 |
|-----------------------------------------|-------------------------------------------------------------------------------------------|
| <b>Definition</b>                       | Patients with a provisional diagnosis of APO who had a 12 lead ECG obtained               |
| <b>Category</b>                         | Clinical                                                                                  |
| <b>Subcategory</b>                      | Acute pulmonary oedema                                                                    |
| <b>Clinical Pathway/Service Pathway</b> | Clinical > APO > 12 lead ECG obtained                                                     |
| <b>Measure Type</b>                     | Process                                                                                   |
| <b>Target Population</b>                | Adult patients<br>Medical patients                                                        |
| <b>Unit of Analysis</b>                 | Clinician<br>Shift<br>Base<br>Service                                                     |
| <b>Denominator Statement</b>            | Total number of patients transported by EMS personnel with a provisional diagnosis of APO |
| <b>Case Mix/Risk Adjustment</b>         | Primary (Community) calls<br>Secondary (Transfer) calls                                   |
| <b>Exclusion Criteria</b>               | Paediatric patients<br>Insufficient reporting data                                        |
| <b>Measure Calculation</b>              | Numerator/Denominator X 100 = %                                                           |
| <b>Numerical Reporting Format</b>       | Percentage (%)                                                                            |
| <b>Graphical Reporting Format</b>       | Run chart (min 10 data points)<br>SPC chart (min 20 data points)                          |
| <b>Reported Indicator</b>               | % Patients with a provisional diagnosis of APO who had a 12 lead ECG obtained             |
| <b>Data Source</b>                      | Patient Report Form                                                                       |
| <b>Suggested Reporting Period</b>       | Monthly<br>Quarterly<br>Annually                                                          |
| <b>Recommended Review Period</b>        | Three years                                                                               |

## Section 1: Clinical Category

### Part 3: Airway Management

- C-Am-P-1 Patients who received a pre-ETI paralytic, following which there was a decrease in SpO<sub>2</sub> > 10% from baseline /or decrease below 70% overall
- C-Am-P-2 Patients successfully intubated by EMS personnel where EtCO<sub>2</sub> monitoring was used post ETI
- C-Am-P-3 Patients successfully intubated via RSI by EMS personnel where a paralytic agent was administered post-ETI
- C-Am-P-4 Patients successfully intubated by EMS personnel where a sedative agent was administered post-ETI
- C-Am-P-5 Patients successfully intubated by EMS personnel where a mechanical ventilator was used post-ETI for ventilation
- C-Am-P-6 Patients in whom ETI was attempted by EMS personnel who had an alternative airway inserted as a final airway
- C-Am-P-7 Patients in whom ETI was attempted by EMS personnel who had a surgical airway inserted
- C-Am-P-8 Patients successfully intubated by EMS personnel with an EtCO<sub>2</sub> < 30 mmHg or > 50 mmHg post-ETI > 10 mins during EMS care
- C-Am-P-9 Patients in whom RSI with ETI was unsuccessful when attempted by EMS personnel
- C-Am-P-10 Patients in whom Non-RSI ETI was unsuccessful when attempted by EMS personnel
- C-Am-P-11 Patients in whom RSI with ETI was successful when attempted by EMS personnel
- C-Am-P-12 Total number of patients successfully intubated via RSI by EMS personnel
- C-Am-P-13 Patients who received/met all components of the defined Airway management composite bundle score  
(A bundle indicator is a grouped indicator composed of several individual indicators - to be defined at the user's discretion)

**C-Am-P-1 Patients who received a pre-ETI paralytic, following which there was a decrease in SpO2 > 10% from baseline /or decrease below 70% overall**

| Measure Code                      | C-Am-P-1                                                                                                                                                                      |
|-----------------------------------|-------------------------------------------------------------------------------------------------------------------------------------------------------------------------------|
| <b>Definition</b>                 | Patients who received a pre-ETI paralytic, following which there was a decrease in SpO2 > 10% from baseline/or decrease below 70% overall                                     |
| <b>Category</b>                   | Clinical                                                                                                                                                                      |
| <b>Subcategory</b>                | Airway management                                                                                                                                                             |
| <b>Measure Type</b>               | Process                                                                                                                                                                       |
| <b>Target Population</b>          | Adult patients<br>Paediatric patients<br>Medical patients<br>Trauma patients                                                                                                  |
| <b>Unit of Analysis</b>           | Clinician<br>Shift<br>Base<br>Region<br>Service                                                                                                                               |
| <b>Numerator Statement</b>        | Total number of patients who received a pre-ETI paralytic, following which there was a decrease in SpO2 > 10% from baseline/or decrease below 70% overall                     |
| <b>Denominator Statement</b>      | Total number of patients who received a pre-ETI paralytic                                                                                                                     |
| <b>Case Mix/Risk Adjustment</b>   | Adult patients<br>Paediatric patients<br>Medical patients<br>Trauma patients<br>Primary (Community) calls<br>Secondary (Transfer) calls<br>Successful ETI<br>Unsuccessful ETI |
| <b>Exclusion Criteria</b>         | OHCA patients<br>Contraindication to the paralytic administered<br>Insufficient reporting data                                                                                |
| <b>Measure Calculation</b>        | Numerator/Denominator X 100 = %                                                                                                                                               |
| <b>Numerical Reporting Format</b> | Percentage (%)                                                                                                                                                                |
| <b>Graphical Reporting Format</b> | Run chart (min 10 data points)<br>SPC chart (min 20 data points)                                                                                                              |
| <b>Reported Indicator</b>         | Patients who received a pre-ETI paralytic, following which there was a decrease in SpO2 > 10% from baseline                                                                   |



Development of Clinical Quality and Performance Indicators for Emergency Medical Services in the Low to Middle Income Setting: The South African perspective

|                                   |                                            |
|-----------------------------------|--------------------------------------------|
| <b>Data Source</b>                | Patient Report Form<br>Airway Register     |
| <b>Suggested Reporting Period</b> | Weekly<br>Monthly<br>Quarterly<br>Annually |
| <b>Recommended Review Period</b>  | Three years                                |

## C-Am-P-1 Patients successfully intubated by EMS personnel where EtCO<sub>2</sub> monitoring was used post ETI

| Measure Code                      | C-Am-P-1                                                                                                                                |
|-----------------------------------|-----------------------------------------------------------------------------------------------------------------------------------------|
| <b>Definition</b>                 | Patients successfully intubated by EMS personnel where EtCO <sub>2</sub> monitoring was used post ETI                                   |
| <b>Category</b>                   | Clinical                                                                                                                                |
| <b>Subcategory</b>                | Airway management                                                                                                                       |
| <b>Measure Type</b>               | Process                                                                                                                                 |
| <b>Target Population</b>          | Adult patients<br>Paediatric patients<br>Medical patients<br>Trauma patients                                                            |
| <b>Unit of Analysis</b>           | Clinician<br>Shift<br>Base<br>Region<br>Service                                                                                         |
| <b>Numerator Statement</b>        | Total number of patients successfully intubated by EMS personnel where EtCO <sub>2</sub> monitoring was used post ETI                   |
| <b>Denominator Statement</b>      | Total number of patients successfully intubated by EMS personnel                                                                        |
| <b>Case Mix/Risk Adjustment</b>   | Adult patients<br>Paediatric patients<br>Medical patients<br>Trauma patients<br>Primary (Community) calls<br>Secondary (Transfer) calls |
| <b>Exclusion Criteria</b>         | OHCA patients<br>Failed ETI<br>Insufficient reporting data                                                                              |
| <b>Measure Calculation</b>        | Numerator/Denominator X 100 = %                                                                                                         |
| <b>Numerical Reporting Format</b> | Percentage (%)                                                                                                                          |
| <b>Graphical Reporting Format</b> | Run chart (min 10 data points)<br>SPC chart (min 20 data points)                                                                        |
| <b>Reported Indicator</b>         | % Patients successfully intubated by EMS personnel where EtCO <sub>2</sub> monitoring was used post ETI                                 |
| <b>Data Source</b>                | Patient Report Form<br>Airway Register                                                                                                  |
| <b>Suggested Reporting Period</b> | Weekly<br>Monthly<br>Quarterly<br>Annually                                                                                              |

Development of Clinical Quality and Performance Indicators for Emergency Medical Services in the Low to Middle Income Setting: The South African perspective

|                                  |             |
|----------------------------------|-------------|
| <b>Recommended Review Period</b> | Three years |
|----------------------------------|-------------|

### C-Am-P-3 Patients successfully intubated via RSI by EMS personnel where a paralytic agent was administered post-ETI

| Measure Code                      | C-Am-P-3                                                                                                                                |
|-----------------------------------|-----------------------------------------------------------------------------------------------------------------------------------------|
| <b>Definition</b>                 | Patients successfully intubated via RSI by EMS personnel where a paralytic agent was administered post-ETI                              |
| <b>Category</b>                   | Clinical                                                                                                                                |
| <b>Subcategory</b>                | Airway management                                                                                                                       |
| <b>Measure Type</b>               | Process                                                                                                                                 |
| <b>Target Population</b>          | Adult patients<br>Paediatric patients<br>Medical patients<br>Trauma patients                                                            |
| <b>Unit of Analysis</b>           | Clinician<br>Shift<br>Base<br>Region<br>Service                                                                                         |
| <b>Numerator Statement</b>        | Total number of patients successfully intubated via RSI by EMS personnel where a paralytic agent was administered post-ETI              |
| <b>Denominator Statement</b>      | Total number of patients successfully intubated by via RSI by EMS personnel                                                             |
| <b>Case Mix/Risk Adjustment</b>   | Adult patients<br>Paediatric patients<br>Medical patients<br>Trauma patients<br>Primary (Community) calls<br>Secondary (Transfer) calls |
| <b>Exclusion Criteria</b>         | OHCA patients<br>Failed ETI<br>Non-RSI ETI<br>Contraindication to the paralytic administered<br>Insufficient reporting data             |
| <b>Measure Calculation</b>        | Numerator/Denominator X 100 = %                                                                                                         |
| <b>Numerical Reporting Format</b> | Percentage (%)                                                                                                                          |
| <b>Graphical Reporting Format</b> | Run chart (min 10 data points)<br>SPC chart (min 20 data points)                                                                        |
| <b>Reported Indicator</b>         | % Patients successfully intubated via RSI by EMS personnel where a paralytic agent was administered post-ETI                            |
| <b>Data Source</b>                | Patient Report Form<br>Airway Register                                                                                                  |

Development of Clinical Quality and Performance Indicators for Emergency Medical Services in the Low to Middle Income Setting: The South African perspective

|                                   |                                            |
|-----------------------------------|--------------------------------------------|
| <b>Suggested Reporting Period</b> | Weekly<br>Monthly<br>Quarterly<br>Annually |
| <b>Recommended Review Period</b>  | Three years                                |

## C-Am-P-4 Patients successfully intubated by EMS personnel where a sedative agent was administered post-ETI

| Measure Code                      | C-Am-P-4                                                                                                                                |
|-----------------------------------|-----------------------------------------------------------------------------------------------------------------------------------------|
| <b>Definition</b>                 | Patients successfully intubated by EMS personnel where a sedative agent was administered post-ETI                                       |
| <b>Category</b>                   | Clinical                                                                                                                                |
| <b>Subcategory</b>                | Airway management                                                                                                                       |
| <b>Measure Type</b>               | Process                                                                                                                                 |
| <b>Target Population</b>          | Adult patients<br>Paediatric patients<br>Medical patients<br>Trauma patients                                                            |
| <b>Unit of Analysis</b>           | Clinician<br>Shift<br>Base<br>Region<br>Service                                                                                         |
| <b>Numerator Statement</b>        | Total number of patients successfully intubated by EMS personnel where a sedative agent was administered post-ETI                       |
| <b>Denominator Statement</b>      | Total number of patients successfully intubated by EMS personnel                                                                        |
| <b>Case Mix/Risk Adjustment</b>   | Adult patients<br>Paediatric patients<br>Medical patients<br>Trauma patients<br>Primary (Community) calls<br>Secondary (Transfer) calls |
| <b>Exclusion Criteria</b>         | OHCA patients<br>Failed ETI<br>Contraindication to the sedative administered                                                            |
| <b>Measure Calculation</b>        | Numerator/Denominator X 100 = %                                                                                                         |
| <b>Numerical Reporting Format</b> | Percentage (%)                                                                                                                          |
| <b>Graphical Reporting Format</b> | Run chart (min 10 data points)<br>SPC chart (min 20 data points)                                                                        |
| <b>Reported Indicator</b>         | % Patients successfully intubated by EMS personnel where a sedative agent was administered post-ETI                                     |
| <b>Data Source</b>                | Patient Report Form<br>Airway Register                                                                                                  |
| <b>Suggested Reporting Period</b> | Weekly<br>Monthly<br>Quarterly<br>Annually                                                                                              |

Development of Clinical Quality and Performance Indicators for Emergency Medical Services in the Low to Middle Income Setting: The South African perspective

|                                  |             |
|----------------------------------|-------------|
| <b>Recommended Review Period</b> | Three years |
|----------------------------------|-------------|

## C-Am-P-5 Patients successfully intubated by EMS personnel where a mechanical ventilator was used post-ETI for ventilation

| Measure Code                      | C-Am-P-5                                                                                                                                |
|-----------------------------------|-----------------------------------------------------------------------------------------------------------------------------------------|
| <b>Definition</b>                 | Patients successfully intubated by EMS personnel where a mechanical ventilator was used post-ETI for ventilation                        |
| <b>Category</b>                   | Clinical                                                                                                                                |
| <b>Subcategory</b>                | Airway management                                                                                                                       |
| <b>Measure Type</b>               | Process                                                                                                                                 |
| <b>Target Population</b>          | Adult patients<br>Paediatric patients<br>Medical patients<br>Trauma patients                                                            |
| <b>Unit of Analysis</b>           | Clinician<br>Shift<br>Base<br>Region<br>Service                                                                                         |
| <b>Numerator Statement</b>        | Total number of patients successfully intubated by EMS personnel where a mechanical ventilator was used post-ETI for ventilation        |
| <b>Denominator Statement</b>      | Total number of patients successfully intubated by EMS personnel                                                                        |
| <b>Case Mix/Risk Adjustment</b>   | Adult patients<br>Paediatric patients<br>Medical patients<br>Trauma patients<br>Primary (Community) calls<br>Secondary (Transfer) calls |
| <b>Exclusion Criteria</b>         | OHCA patients<br>Failed ETI<br>Insufficient reporting data                                                                              |
| <b>Measure Calculation</b>        | $\text{Numerator/Denominator} \times 100 = \%$                                                                                          |
| <b>Numerical Reporting Format</b> | Percentage (%)                                                                                                                          |
| <b>Graphical Reporting Format</b> | Run chart (min 10 data points)<br>SPC chart (min 20 data points)                                                                        |
| <b>Reported Indicator</b>         | % Patients successfully intubated by EMS personnel where a mechanical ventilator was used post-ETI for ventilation                      |
| <b>Data Source</b>                | Patient Report Form<br>Airway Register                                                                                                  |



Development of Clinical Quality and Performance Indicators for Emergency Medical Services in the Low to Middle Income Setting: The South African perspective

|                                   |                                            |
|-----------------------------------|--------------------------------------------|
| <b>Suggested Reporting Period</b> | Weekly<br>Monthly<br>Quarterly<br>Annually |
| <b>Recommended Review Period</b>  | Three years                                |

## C-Am-P-6 Patients in whom ETI was attempted by EMS personnel who had an alternative airway inserted as a final airway

| Measure Code                      | C-Am-P-6                                                                                                                                |
|-----------------------------------|-----------------------------------------------------------------------------------------------------------------------------------------|
| <b>Definition</b>                 | Patients in whom ETI was attempted by EMS personnel who had an alternative airway inserted as a final airway                            |
| <b>Category</b>                   | Clinical                                                                                                                                |
| <b>Subcategory</b>                | Airway management                                                                                                                       |
| <b>Measure Type</b>               | Process                                                                                                                                 |
| <b>Target Population</b>          | Adult patients<br>Paediatric patients<br>Medical patients<br>Trauma patients                                                            |
| <b>Unit of Analysis</b>           | Clinician<br>Shift<br>Base<br>Region<br>Service                                                                                         |
| <b>Numerator Statement</b>        | Total number of patients in whom ETI was attempted by EMS personnel who had an alternative airway inserted as a final airway            |
| <b>Denominator Statement</b>      | Total number of patients where ETI was attempted by EMS personnel                                                                       |
| <b>Case Mix/Risk Adjustment</b>   | Adult patients<br>Paediatric patients<br>Medical patients<br>Trauma patients<br>Primary (Community) calls<br>Secondary (Transfer) calls |
| <b>Exclusion Criteria</b>         | OHCA patients<br>Patients where the alternative airway was the primary method of airway insertion<br>Insufficient reporting data        |
| <b>Measure Calculation</b>        | Numerator/Denominator X 100 = %                                                                                                         |
| <b>Numerical Reporting Format</b> | Percentage (%)                                                                                                                          |
| <b>Graphical Reporting Format</b> | Run chart (min 10 data points)<br>SPC chart (min 20 data points)                                                                        |
| <b>Reported Indicator</b>         | % Patients in whom ETI was attempted by EMS personnel who had an Alternative airway inserted as a final airway                          |
| <b>Data Source</b>                | Patient Report Form<br>Airway Register                                                                                                  |

Development of Clinical Quality and Performance Indicators for Emergency Medical Services in the Low to Middle Income Setting: The South African perspective

|                                   |                                            |
|-----------------------------------|--------------------------------------------|
| <b>Suggested Reporting Period</b> | Weekly<br>Monthly<br>Quarterly<br>Annually |
| <b>Recommended Review Period</b>  | Three years                                |

## C-Am-P-7 Patients in whom ETI was attempted by EMS personnel who had a surgical airway inserted

| Measure Code                      | C-Am-P-7                                                                                                                                |
|-----------------------------------|-----------------------------------------------------------------------------------------------------------------------------------------|
| <b>Definition</b>                 | Patients in whom ETI was attempted by EMS personnel who had a surgical airway inserted                                                  |
| <b>Category</b>                   | Clinical                                                                                                                                |
| <b>Subcategory</b>                | Airway management                                                                                                                       |
| <b>Measure Type</b>               | Process                                                                                                                                 |
| <b>Target Population</b>          | Adult patients<br>Paediatric patients<br>Medical patients<br>Trauma patients                                                            |
| <b>Unit of Analysis</b>           | Clinician<br>Shift<br>Base<br>Region<br>Service                                                                                         |
| <b>Numerator Statement</b>        | Total number of patients in whom ETI was attempted by EMS personnel who had a surgical airway inserted                                  |
| <b>Denominator Statement</b>      | Total number of patients where ETI was attempted by EMS personnel                                                                       |
| <b>Case Mix/Risk Adjustment</b>   | Adult patients<br>Paediatric patients<br>Medical patients<br>Trauma patients<br>Primary (Community) calls<br>Secondary (Transfer) calls |
| <b>Exclusion Criteria</b>         | OHCA patients<br>Patients where the Surgical Airway was the primary method of airway insertion<br>Insufficient reporting data           |
| <b>Measure Calculation</b>        | Numerator/Denominator X 100 = %                                                                                                         |
| <b>Numerical Reporting Format</b> | Percentage (%)                                                                                                                          |
| <b>Graphical Reporting Format</b> | Run chart (min 10 data points)<br>SPC chart (min 20 data points)                                                                        |
| <b>Reported Indicator</b>         | % Patients in whom ETI was attempted by EMS personnel who had a Surgical airway inserted                                                |
| <b>Data Source</b>                | Patient Report Form<br>Airway Register                                                                                                  |

Development of Clinical Quality and Performance Indicators for Emergency Medical Services in the Low to Middle Income Setting: The South African perspective

|                                   |                                            |
|-----------------------------------|--------------------------------------------|
| <b>Suggested Reporting Period</b> | Weekly<br>Monthly<br>Quarterly<br>Annually |
| <b>Recommended Review Period</b>  | Three years                                |

## C-Am-P-8 Patients successfully intubated by EMS personnel with an EtCO<sub>2</sub> < 30 mmHg or > 50 mmHg post-ETI > 10 mins during EMS care

| Measure Code                      | C-Am-P-8                                                                                                                                             |
|-----------------------------------|------------------------------------------------------------------------------------------------------------------------------------------------------|
| <b>Definition</b>                 | Patients successfully intubated by EMS personnel with an EtCO <sub>2</sub> < 30 mmHg or > 50 mmHg post-ETI > 10 mins during EMS care                 |
| <b>Category</b>                   | Clinical                                                                                                                                             |
| <b>Subcategory</b>                | Airway management                                                                                                                                    |
| <b>Measure Type</b>               | Process                                                                                                                                              |
| <b>Target Population</b>          | Adult patients<br>Paediatric patients<br>Medical patients<br>Trauma patients                                                                         |
| <b>Unit of Analysis</b>           | Clinician<br>Shift<br>Base<br>Region<br>Service                                                                                                      |
| <b>Numerator Statement</b>        | Total number of patients successfully intubated by EMS personnel with an EtCO <sub>2</sub> < 30 mmHg or > 50 mmHg post-ETI > 10 mins during EMS care |
| <b>Denominator Statement</b>      | Total number of patients successfully intubated by EMS personnel                                                                                     |
| <b>Case Mix/Risk Adjustment</b>   | Adult patients<br>Paediatric patients<br>Medical patients<br>Trauma patients<br>Primary (Community) calls<br>Secondary (Transfer) calls              |
| <b>Exclusion Criteria</b>         | OHCA patients<br>Failed ETI<br>Insufficient reporting data                                                                                           |
| <b>Measure Calculation</b>        | Numerator/Denominator X 100 = %                                                                                                                      |
| <b>Numerical Reporting Format</b> | Percentage (%)                                                                                                                                       |
| <b>Graphical Reporting Format</b> | Run chart (min 10 data points)<br>SPC chart (min 20 data points)                                                                                     |
| <b>Reported Indicator</b>         | % Patients successfully intubated by EMS personnel with an EtCO <sub>2</sub> < 30 mmHg or > 50 mmHg post-ETI > 10 mins during EMS care               |
| <b>Data Source</b>                | Patient Report Form<br>Airway Register                                                                                                               |

Development of Clinical Quality and Performance Indicators for Emergency Medical Services in the Low to Middle Income Setting: The South African perspective

|                                   |                                            |
|-----------------------------------|--------------------------------------------|
| <b>Suggested Reporting Period</b> | Weekly<br>Monthly<br>Quarterly<br>Annually |
| <b>Recommended Review Period</b>  | Three years                                |

## C-Am-P-9 Patients in whom RSI with ETI was unsuccessful when attempted by EMS personnel

| Measure Code                      | C-Am-P-9                                                                                                                                |
|-----------------------------------|-----------------------------------------------------------------------------------------------------------------------------------------|
| <b>Definition</b>                 | Patients in whom RSI with ETI was unsuccessful when attempted by EMS personnel                                                          |
| <b>Category</b>                   | Clinical                                                                                                                                |
| <b>Subcategory</b>                | Airway management                                                                                                                       |
| <b>Measure Type</b>               | Process                                                                                                                                 |
| <b>Target Population</b>          | Adult patients<br>Paediatric patients<br>Medical patients<br>Trauma patients                                                            |
| <b>Unit of Analysis</b>           | Clinician<br>Shift<br>Base<br>Region<br>Service                                                                                         |
| <b>Numerator Statement</b>        | Total number of patients in whom RSI with ETI was unsuccessful when attempted by EMS personnel                                          |
| <b>Denominator Statement</b>      | Total number of patients in whom RSI with ETI was attempted by EMS personnel                                                            |
| <b>Case Mix/Risk Adjustment</b>   | Adult patients<br>Paediatric patients<br>Medical patients<br>Trauma patients<br>Primary (Community) calls<br>Secondary (Transfer) calls |
| <b>Exclusion Criteria</b>         | OHCA patients<br>Where the Alternative airway was the primary method of airway insertion<br>Insufficient reporting data                 |
| <b>Measure Calculation</b>        | Numerator/Denominator X 100 = %                                                                                                         |
| <b>Numerical Reporting Format</b> | Percentage (%)                                                                                                                          |
| <b>Graphical Reporting Format</b> | Run chart (min 10 data points)<br>SPC chart (min 20 data points)                                                                        |
| <b>Reported Indicator</b>         | % Patients in whom RSI with ETI was unsuccessful when attempted by EMS personnel                                                        |
| <b>Data Source</b>                | Patient Report Form<br>Airway Register                                                                                                  |



Development of Clinical Quality and Performance Indicators for Emergency Medical Services in the Low to Middle Income Setting: The South African perspective

|                                   |                                            |
|-----------------------------------|--------------------------------------------|
| <b>Suggested Reporting Period</b> | Weekly<br>Monthly<br>Quarterly<br>Annually |
| <b>Recommended Review Period</b>  | Three years                                |

## C-Am-P-10 Patients in whom Non-RSI ETI was unsuccessful when attempted by EMS personnel

| Measure Code                      | C-Am-P-10                                                                                                                               |
|-----------------------------------|-----------------------------------------------------------------------------------------------------------------------------------------|
| <b>Definition</b>                 | Patients in whom Non-RSI ETI was unsuccessful when attempted by EMS personnel                                                           |
| <b>Category</b>                   | Clinical                                                                                                                                |
| <b>Subcategory</b>                | Airway management                                                                                                                       |
| <b>Measure Type</b>               | Process                                                                                                                                 |
| <b>Target Population</b>          | Adult patients<br>Paediatric patients<br>Medical patients<br>Trauma patients                                                            |
| <b>Unit of Analysis</b>           | Clinician<br>Shift<br>Base<br>Region<br>Service                                                                                         |
| <b>Numerator Statement</b>        | Total number of patients in whom Non-RSI ETI was unsuccessful when attempted by EMS personnel                                           |
| <b>Denominator Statement</b>      | Total number of patients in whom Non-RSI ETI was attempted by EMS personnel                                                             |
| <b>Case Mix/Risk Adjustment</b>   | Adult patients<br>Paediatric patients<br>Medical patients<br>Trauma patients<br>Primary (Community) calls<br>Secondary (Transfer) calls |
| <b>Exclusion Criteria</b>         | OHCA patients<br>Where the Alternative airway was the primary method of airway insertion<br>Insufficient reporting data                 |
| <b>Measure Calculation</b>        | Numerator/Denominator X 100 = %                                                                                                         |
| <b>Numerical Reporting Format</b> | Percentage (%)                                                                                                                          |
| <b>Graphical Reporting Format</b> | Run chart (min 10 data points)<br>SPC chart (min 20 data points)                                                                        |
| <b>Reported Indicator</b>         | % Patients in whom Non-RSI ETI was unsuccessful when attempted by EMS personnel                                                         |
| <b>Data Source</b>                | Patient Report Form<br>Airway Register                                                                                                  |
| <b>Suggested Reporting Period</b> | Weekly<br>Monthly<br>Quarterly<br>Annually                                                                                              |

|                                  |             |
|----------------------------------|-------------|
| <b>Recommended Review Period</b> | Three years |
|----------------------------------|-------------|

## C-Am-P-11 Patients in whom RSI with ETI was successful when attempted by EMS personnel

| Measure Code                      | C-Am-P-11                                                                                                                               |
|-----------------------------------|-----------------------------------------------------------------------------------------------------------------------------------------|
| <b>Definition</b>                 | Patients in whom RSI with ETI was successful when attempted by EMS personnel                                                            |
| <b>Category</b>                   | Clinical                                                                                                                                |
| <b>Subcategory</b>                | Airway management                                                                                                                       |
| <b>Measure Type</b>               | Process                                                                                                                                 |
| <b>Target Population</b>          | Adult patients<br>Paediatric patients<br>Medical patients<br>Trauma patients                                                            |
| <b>Unit of Analysis</b>           | Clinician<br>Shift<br>Base<br>Region<br>Service                                                                                         |
| <b>Numerator Statement</b>        | Total number of patients in whom RSI with ETI was successful when attempted by EMS personnel                                            |
| <b>Denominator Statement</b>      | Total number of patients in whom RSI with ETI was attempted by EMS personnel                                                            |
| <b>Case Mix/Risk Adjustment</b>   | Adult patients<br>Paediatric patients<br>Medical patients<br>Trauma patients<br>Primary (Community) calls<br>Secondary (Transfer) calls |
| <b>Exclusion Criteria</b>         | OHCA patients<br>Failed ETI<br>Where the Alternative airway was the primary method of airway insertion                                  |
| <b>Measure Calculation</b>        | Numerator/Denominator X 100 = %                                                                                                         |
| <b>Numerical Reporting Format</b> | Percentage (%)                                                                                                                          |
| <b>Graphical Reporting Format</b> | Run chart (min 10 data points)<br>SPC chart (min 20 data points)                                                                        |
| <b>Reported Indicator</b>         | % Patients in whom RSI with ETI was successful when attempted by EMS personnel                                                          |
| <b>Data Source</b>                | Patient Report Form<br>Airway Register                                                                                                  |
| <b>Suggested Reporting Period</b> | Weekly<br>Monthly<br>Quarterly<br>Annually                                                                                              |

Development of Clinical Quality and Performance Indicators for Emergency Medical Services in the Low to Middle Income Setting: The South African perspective

|                                  |             |
|----------------------------------|-------------|
| <b>Recommended Review Period</b> | Three years |
|----------------------------------|-------------|

## C-Am-P-12 Patients successfully intubated via RSI by EMS personnel

| Measure Code                      | C-Am-P-12                                                                                                                               |
|-----------------------------------|-----------------------------------------------------------------------------------------------------------------------------------------|
| <b>Definition</b>                 | Patients successfully intubated via RSI by EMS personnel                                                                                |
| <b>Category</b>                   | Clinical                                                                                                                                |
| <b>Subcategory</b>                | Airway management                                                                                                                       |
| <b>Measure Type</b>               | Process                                                                                                                                 |
| <b>Target Population</b>          | Adult patients<br>Paediatric patients<br>Medical patients<br>Trauma patients                                                            |
| <b>Unit of Analysis</b>           | Clinician<br>Shift<br>Base<br>Region<br>Service                                                                                         |
| <b>Numerator Statement</b>        | Total number of patients successfully intubated via RSI by EMS personnel                                                                |
| <b>Denominator Statement</b>      | Total number of patients transported by EMS                                                                                             |
| <b>Case Mix/Risk Adjustment</b>   | Adult patients<br>Paediatric patients<br>Medical patients<br>Trauma patients<br>Primary (Community) calls<br>Secondary (Transfer) calls |
| <b>Exclusion Criteria</b>         | OHCA patients<br>Failed ETI<br>Where the Alternative airway was the primary method of airway insertion<br>Insufficient reporting data   |
| <b>Measure Calculation</b>        | $\text{Numerator/Denominator} \times 1000 = \text{EMS RSI ETIs per 1000 EMS patient transports}$                                        |
| <b>Numerical Reporting Format</b> | Per 1000 EMS patient transports                                                                                                         |
| <b>Graphical Reporting Format</b> | Run chart (min 10 data points)<br>SPC chart (min 20 data points)                                                                        |
| <b>Reported Indicator</b>         | EMS RSI ETIs per 1000 EMS patient transports                                                                                            |
| <b>Data Source</b>                | Patient Report Form<br>Airway Register                                                                                                  |
| <b>Suggested Reporting Period</b> | Weekly<br>Monthly<br>Quarterly<br>Annually                                                                                              |
| <b>Recommended Review Period</b>  | Three years                                                                                                                             |

Development of Clinical Quality and Performance Indicators for Emergency Medical Services in the Low to Middle Income Setting: The South African perspective

### C-Am-P-13 Patients who received/met all components of the defined Airway management composite bundle score

| Measure Code                      | C-Am-P-13                                                                                                                                                                       |
|-----------------------------------|---------------------------------------------------------------------------------------------------------------------------------------------------------------------------------|
| <b>Definition</b>                 | Patients who received/met all components of the defined Airway management composite bundle score                                                                                |
| <b>Category</b>                   | Clinical                                                                                                                                                                        |
| <b>Subcategory</b>                | Airway management                                                                                                                                                               |
| <b>Measure Type</b>               | Process                                                                                                                                                                         |
| <b>Target Population</b>          | Adult patients<br>Paediatric patients<br>Medical patients<br>Trauma patients                                                                                                    |
| <b>Unit of Analysis</b>           | Clinician<br>Shift<br>Base<br>Region<br>Service                                                                                                                                 |
| <b>Numerator Statement</b>        | Total number of patients who received/met all components of the defined Airway management composite bundle score                                                                |
| <b>Denominator Statement</b>      | Determined based on Airway Management bundle composite score items                                                                                                              |
| <b>Case Mix/Risk Adjustment</b>   | Adult patients<br>Paediatric patients<br>Medical patients<br>Trauma patients<br>Primary (Community) calls<br>Secondary (Transfer) calls<br>Successfully ETI<br>Unsuccessful ETI |
| <b>Exclusion Criteria</b>         | OHCA patients<br>Insufficient reporting data                                                                                                                                    |
| <b>Measure Calculation</b>        | Numerator/Denominator X 100 = %                                                                                                                                                 |
| <b>Numerical Reporting Format</b> | Percentage (%)                                                                                                                                                                  |
| <b>Graphical Reporting Format</b> | Run chart (min 10 data points)<br>SPC chart (min 20 data points)                                                                                                                |
| <b>Reported Indicator</b>         | % Patients who received/met all components of the defined Airway Management composite bundle score                                                                              |
| <b>Data Source</b>                | Patient Report Form<br>Airway Register                                                                                                                                          |



Development of Clinical Quality and Performance Indicators for Emergency Medical Services in the Low to Middle Income Setting: The South African perspective

|                                   |                                            |
|-----------------------------------|--------------------------------------------|
| <b>Suggested Reporting Period</b> | Weekly<br>Monthly<br>Quarterly<br>Annually |
| <b>Recommended Review Period</b>  | Three years                                |

## Section 1: Clinical Domain

### Part 4: Anaphylaxis

- C-An-P-1 Patients with a provisional diagnosis of Anaphylaxis and evidence of bronchoconstriction documented who were administered a B2 agonist
- C-An-P-2 Patients with a provisional diagnosis of Anaphylaxis and evidence of bronchoconstriction documented who were administered an anticholinergic bronchodilator
- C-An-P-3 Patients with a provisional diagnosis of Anaphylaxis who were administered an antihistamine
- C-An-P-4 Patients with a provisional diagnosis of Anaphylaxis who were administered a corticosteroid
- C-An-P-5 Patients with a provisional diagnosis of Anaphylaxis and signs of a severe systemic response recorded who were administered IM Adrenaline

## C-An-P-1 Patients with a provisional diagnosis of Anaphylaxis and evidence of bronchoconstriction documented who were administered a B2 agonist

| Measure Code                      | C-An-P-1                                                                                                                                         |
|-----------------------------------|--------------------------------------------------------------------------------------------------------------------------------------------------|
| <b>Definition</b>                 | Patients with a provisional diagnosis of Anaphylaxis and evidence of bronchoconstriction documented who were administered a B2 agonist           |
| <b>Category</b>                   | Clinical                                                                                                                                         |
| <b>Subcategory</b>                | Anaphylaxis                                                                                                                                      |
| <b>Measure Type</b>               | Process                                                                                                                                          |
| <b>Target Population</b>          | Adult patients<br>Paediatric patients<br>Medical patients                                                                                        |
| <b>Unit of Analysis</b>           | Clinician<br>Shift<br>Base<br>Service                                                                                                            |
| <b>Denominator Statement</b>      | Total number of patients transported by EMS personnel with a provisional diagnosis of Anaphylaxis and evidence of bronchoconstriction documented |
| <b>Case Mix/Risk Adjustment</b>   | Adult patients<br>Paediatric patients<br>Systolic BP < 90 mmHg systolic for > 10 mins                                                            |
| <b>Exclusion Criteria</b>         | Contraindication to the Antihistamine administered<br>Insufficient reporting data                                                                |
| <b>Measure Calculation</b>        | Numerator/Denominator X 100 = %                                                                                                                  |
| <b>Numerical Reporting Format</b> | Percentage (%)                                                                                                                                   |
| <b>Graphical Reporting Format</b> | Run chart (min 10 data points)<br>SPC chart (min 20 data points)                                                                                 |
| <b>Reported Indicator</b>         | % Patients with a provisional diagnosis of Anaphylaxis and evidence of bronchoconstriction documented who were administered a B2 agonist         |
| <b>Data Source</b>                | Patient Report Form                                                                                                                              |
| <b>Suggested Reporting Period</b> | Monthly<br>Quarterly<br>Annually                                                                                                                 |
| <b>Recommended Review Period</b>  | Three years                                                                                                                                      |

## C-An-P-2 Patients with a provisional diagnosis of Anaphylaxis and evidence of bronchoconstriction documented who were administered an anticholinergic bronchodilator

| Measure Code                      | C-An-P-2                                                                                                                                                      |
|-----------------------------------|---------------------------------------------------------------------------------------------------------------------------------------------------------------|
| <b>Definition</b>                 | Patients with a provisional diagnosis of Anaphylaxis and evidence of bronchoconstriction documented who were administered an anticholinergic bronchodilator   |
| <b>Category</b>                   | Clinical                                                                                                                                                      |
| <b>Subcategory</b>                | Anaphylaxis                                                                                                                                                   |
| <b>Measure Type</b>               | Process                                                                                                                                                       |
| <b>Target Population</b>          | Adult patients<br>Paediatric patients<br>Medical patients                                                                                                     |
| <b>Unit of Analysis</b>           | Clinician<br>Shift<br>Base<br>Service                                                                                                                         |
| <b>Denominator Statement</b>      | Total number of patients transported by EMS personnel with a provisional diagnosis of Anaphylaxis and evidence of bronchoconstriction documented              |
| <b>Case Mix/Risk Adjustment</b>   | Adult patients<br>Paediatric patients<br>Systolic BP < 90 mmHg systolic for > 10 mins                                                                         |
| <b>Exclusion Criteria</b>         | Contraindication to the Antihistamine administered<br>Insufficient reporting data                                                                             |
| <b>Measure Calculation</b>        | Numerator/Denominator X 100 = %                                                                                                                               |
| <b>Numerical Reporting Format</b> | Percentage (%)                                                                                                                                                |
| <b>Graphical Reporting Format</b> | Run chart (min 10 data points)<br>SPC chart (min 20 data points)                                                                                              |
| <b>Reported Indicator</b>         | % Patients with a provisional diagnosis of Anaphylaxis and evidence of bronchoconstriction documented who were administered an anticholinergic bronchodilator |
| <b>Data Source</b>                | Patient Report Form                                                                                                                                           |
| <b>Suggested Reporting Period</b> | Monthly<br>Quarterly<br>Annually                                                                                                                              |
| <b>Recommended Review Period</b>  | Three years                                                                                                                                                   |

### C-An-P-3 Patients with a provisional diagnosis of Anaphylaxis who were administered an antihistamine

| Measure Code                      | C-An-P-3                                                                                          |
|-----------------------------------|---------------------------------------------------------------------------------------------------|
| <b>Definition</b>                 | Patients with a provisional diagnosis of Anaphylaxis who were administered an antihistamine       |
| <b>Category</b>                   | Clinical                                                                                          |
| <b>Subcategory</b>                | Anaphylaxis                                                                                       |
| <b>Measure Type</b>               | Process                                                                                           |
| <b>Target Population</b>          | Adult patients<br>Paediatric patients<br>Medical patients                                         |
| <b>Unit of Analysis</b>           | Clinician<br>Shift<br>Base<br>Service                                                             |
| <b>Denominator Statement</b>      | Total number of patients transported by EMS personnel with a provisional diagnosis of Anaphylaxis |
| <b>Case Mix/Risk Adjustment</b>   | Adult patients<br>Paediatric patients<br>Systolic BP < 90 mmHg systolic for > 10 mins             |
| <b>Exclusion Criteria</b>         | Contraindication to the Antihistamine administered<br>Insufficient reporting data                 |
| <b>Measure Calculation</b>        | Numerator/Denominator X 100 = %                                                                   |
| <b>Numerical Reporting Format</b> | Percentage (%)                                                                                    |
| <b>Graphical Reporting Format</b> | Run chart (min 10 data points)<br>SPC chart (min 20 data points)                                  |
| <b>Reported Indicator</b>         | % Patients with a provisional diagnosis of Anaphylaxis who were administered an antihistamine     |
| <b>Data Source</b>                | Patient Report Form                                                                               |
| <b>Suggested Reporting Period</b> | Monthly<br>Quarterly<br>Annually                                                                  |
| <b>Recommended Review Period</b>  | Three years                                                                                       |

## C-An-P-4 Patients with a provisional diagnosis of Anaphylaxis who were administered a corticosteroid

| Measure Code                      | C-An-P-4                                                                                          |
|-----------------------------------|---------------------------------------------------------------------------------------------------|
| <b>Definition</b>                 | Patients with a provisional diagnosis of Anaphylaxis who were administered a corticosteroid       |
| <b>Category</b>                   | Clinical                                                                                          |
| <b>Subcategory</b>                | Anaphylaxis                                                                                       |
| <b>Measure Type</b>               | Process                                                                                           |
| <b>Target Population</b>          | Adult patients<br>Paediatric patients<br>Medical patients                                         |
| <b>Unit of Analysis</b>           | Clinician<br>Shift<br>Base<br>Service                                                             |
| <b>Denominator Statement</b>      | Total number of patients transported by EMS personnel with a provisional diagnosis of Anaphylaxis |
| <b>Case Mix/Risk Adjustment</b>   | Adult patients<br>Paediatric patients<br>Systolic BP < 90 mmHg systolic for > 10 mins             |
| <b>Exclusion Criteria</b>         | Contraindication to the Corticosteroid administered<br>Insufficient reporting data                |
| <b>Measure Calculation</b>        | Numerator/Denominator X 100 = %                                                                   |
| <b>Numerical Reporting Format</b> | Percentage (%)                                                                                    |
| <b>Graphical Reporting Format</b> | Run chart (min 10 data points)<br>SPC chart (min 20 data points)                                  |
| <b>Reported Indicator</b>         | % Patients with a provisional diagnosis of Anaphylaxis who were administered a corticosteroid     |
| <b>Data Source</b>                | Patient Report Form                                                                               |
| <b>Suggested Reporting Period</b> | Monthly<br>Quarterly<br>Annually                                                                  |
| <b>Recommended Review Period</b>  | Three years                                                                                       |

## C-An-P-5 Patients with a provisional diagnosis of Anaphylaxis and signs of a severe systemic response recorded who were administered IM Adrenaline

| Measure Code                      | C-An-P-5                                                                                                                                    |
|-----------------------------------|---------------------------------------------------------------------------------------------------------------------------------------------|
| <b>Definition</b>                 | Patients with a provisional diagnosis of Anaphylaxis and signs of a severe systemic response recorded who were administered IM Adrenaline   |
| <b>Category</b>                   | Clinical                                                                                                                                    |
| <b>Subcategory</b>                | Anaphylaxis                                                                                                                                 |
| <b>Measure Type</b>               | Process                                                                                                                                     |
| <b>Target Population</b>          | Adult patients<br>Paediatric patients<br>Medical patients                                                                                   |
| <b>Unit of Analysis</b>           | Clinician<br>Shift<br>Base<br>Service                                                                                                       |
| <b>Denominator Statement</b>      | Total number of patients transported by EMS with a provisional diagnosis of Anaphylaxis and signs of a severe systemic response recorded    |
| <b>Case Mix/Risk Adjustment</b>   | Adult patients<br>Paediatric patients<br>Systolic BP < 90 mmHg systolic for > 10 mins                                                       |
| <b>Exclusion Criteria</b>         | Contraindication to Adrenaline<br>Insufficient reporting data                                                                               |
| <b>Measure Calculation</b>        | Numerator/Denominator X 100 = %                                                                                                             |
| <b>Numerical Reporting Format</b> | Percentage (%)                                                                                                                              |
| <b>Graphical Reporting Format</b> | Run chart (min 10 data points)<br>SPC chart (min 20 data points)                                                                            |
| <b>Reported Indicator</b>         | % Patients with a provisional diagnosis of Anaphylaxis and signs of a severe systemic response recorded who were administered IM Adrenaline |
| <b>Data Source</b>                | Patient Report Form                                                                                                                         |
| <b>Suggested Reporting Period</b> | Monthly<br>Quarterly<br>Annually                                                                                                            |
| <b>Recommended Review Period</b>  | Three years                                                                                                                                 |

## Section 1: Clinical Category

### Part 5: Asthma/Bronchoconstriction

- C-AB-P-1 Patients with a provisional diagnosis of Asthma/Bronchoconstriction with lung sounds assessed and documented (pre-and post-treatment)
- C-AB-P-2 Patients with a provisional diagnosis of Asthma/Bronchoconstriction with a SpO<sub>2</sub> documented (pre-and post-treatment)
- C-AB-P-3 Patients with a provisional diagnosis of Asthma/Bronchoconstriction who were administered a B2 agonist bronchodilator
- C-AB-P-4 Patients with a provisional diagnosis of Asthma/Bronchoconstriction who were administered an anticholinergic bronchodilator
- C-AB-P-5 Patients with a provisional diagnosis of Asthma/Bronchoconstriction who were administered a corticosteroid
- C-AB-P-6 Patients with a provisional diagnosis of Asthma/Bronchoconstriction recorded with documented severe wheezes/silent chest/BP < 90 mmHg systolic BP who was administered IM Adrenalin administration
- C-AB-P-7 Patients who received/met all components of the defined Asthma/bronchoconstriction composite bundle score (A bundle indicator is a grouped indicator composed of several individual indicators - to be defined at the user's discretion)



## C-AB-P-1 Patients with a provisional diagnosis of Asthma/Bronchoconstriction with lung sounds assessed and documented (pre-and post-treatment)

| Measure Code                      | C-AB-P-1                                                                                                                                              |
|-----------------------------------|-------------------------------------------------------------------------------------------------------------------------------------------------------|
| <b>Definition</b>                 | Patients with a provisional diagnosis of Asthma/Bronchoconstriction with lung sounds assessed and documented (pre-and post-treatment)                 |
| <b>Category</b>                   | Clinical                                                                                                                                              |
| <b>Subcategory</b>                | Asthma/Bronchoconstriction                                                                                                                            |
| <b>Measure Type</b>               | Process                                                                                                                                               |
| <b>Target Population</b>          | Adult<br>Paediatric<br>Medical                                                                                                                        |
| <b>Unit of Analysis</b>           | Clinician<br>Shift<br>Base<br>Service                                                                                                                 |
| <b>Numerator Statement</b>        | Total number of patients with a provisional diagnosis of Asthma/Bronchoconstriction with lung sounds assessed and documented (pre-and post-treatment) |
| <b>Denominator Statement</b>      | Total number of patients with a provisional diagnosis of Asthma/Bronchoconstriction                                                                   |
| <b>Case Mix/Risk Adjustment</b>   | Adult patients<br>Paediatric patients                                                                                                                 |
| <b>Exclusion Criteria</b>         | Insufficient reporting data                                                                                                                           |
| <b>Measure Calculation</b>        | Numerator/Denominator X 100 = %                                                                                                                       |
| <b>Numerical Reporting Format</b> | Percentage (%)                                                                                                                                        |
| <b>Graphical Reporting Format</b> | Run chart (min 10 data points)<br>SPC chart (min 20 data points)                                                                                      |
| <b>Reported Indicator</b>         | % Patients with a provisional diagnosis of Asthma/Bronchoconstriction with lung sounds assessed and documented (pre-and post-treatment)               |
| <b>Data Source</b>                | Patient Report Form                                                                                                                                   |
| <b>Suggested Reporting Period</b> | Monthly<br>Quarterly<br>Annually                                                                                                                      |
| <b>Recommended Review Period</b>  | Three years                                                                                                                                           |

## C-AB-P-2 Patients with a provisional diagnosis of Asthma/Bronchoconstriction with a SpO2 documented (pre-and post-treatment)

| Measure Code                      | C-AB-P-2                                                                                                                            |
|-----------------------------------|-------------------------------------------------------------------------------------------------------------------------------------|
| <b>Definition</b>                 | Patients with a provisional diagnosis of Asthma/Bronchoconstriction with a SpO2 documented (pre-and post-treatment)                 |
| <b>Category</b>                   | Clinical                                                                                                                            |
| <b>Subcategory</b>                | Asthma/Bronchoconstriction                                                                                                          |
| <b>Measure Type</b>               | Process                                                                                                                             |
| <b>Target Population</b>          | Adult<br>Paediatric<br>Medical                                                                                                      |
| <b>Unit of Analysis</b>           | Clinician<br>Shift<br>Base<br>Service                                                                                               |
| <b>Numerator Statement</b>        | Total number of patients with a provisional diagnosis of Asthma/Bronchoconstriction with a SpO2 documented (pre-and post-treatment) |
| <b>Denominator Statement</b>      | Total number of patients with a provisional diagnosis of Asthma/Bronchoconstriction                                                 |
| <b>Case Mix/Risk Adjustment</b>   | Adult patients<br>Paediatric patients                                                                                               |
| <b>Exclusion Criteria</b>         | Insufficient reporting data                                                                                                         |
| <b>Measure Calculation</b>        | Numerator/Denominator X 100 = %                                                                                                     |
| <b>Numerical Reporting Format</b> | Percentage (%)                                                                                                                      |
| <b>Graphical Reporting Format</b> | Run chart (min 10 data points)<br>SPC chart (min 20 data points)                                                                    |
| <b>Reported Indicator</b>         | % Patients with a provisional diagnosis of Asthma/Bronchoconstriction with a SpO2 documented (pre-and post-treatment)               |
| <b>Data Source</b>                | Patient Report Form                                                                                                                 |
| <b>Suggested Reporting Period</b> | Monthly<br>Quarterly<br>Annually                                                                                                    |
| <b>Recommended Review Period</b>  | Three years                                                                                                                         |

### **C-AB-P-3 Patients with a provisional diagnosis of Asthma/Bronchoconstriction who were administered a B2 agonist bronchodilator**

| <b>Measure Code</b>               | <b>C-AB-P-3</b>                                                                                                                       |
|-----------------------------------|---------------------------------------------------------------------------------------------------------------------------------------|
| <b>Definition</b>                 | Patients with a provisional diagnosis of Asthma/Bronchoconstriction who were administered a B2 agonist bronchodilator                 |
| <b>Category</b>                   | Clinical                                                                                                                              |
| <b>Subcategory</b>                | Asthma/Bronchoconstriction                                                                                                            |
| <b>Measure Type</b>               | Process                                                                                                                               |
| <b>Target Population</b>          | Adult<br>Paediatric<br>Medical                                                                                                        |
| <b>Unit of Analysis</b>           | Clinician<br>Shift<br>Base<br>Service                                                                                                 |
| <b>Numerator Statement</b>        | Total number of patients with a provisional diagnosis of Asthma/Bronchoconstriction who were administered a B2 agonist bronchodilator |
| <b>Denominator Statement</b>      | Total number of patients with a provisional diagnosis of Asthma/Bronchoconstriction                                                   |
| <b>Case Mix/Risk Adjustment</b>   | Adult patients<br>Paediatric patients                                                                                                 |
| <b>Exclusion Criteria</b>         | Contraindication to Salbutamol<br>Insufficient reporting data                                                                         |
| <b>Measure Calculation</b>        | Numerator/Denominator X 100 = %                                                                                                       |
| <b>Numerical Reporting Format</b> | Percentage (%)                                                                                                                        |
| <b>Graphical Reporting Format</b> | Run chart (min 10 data points)<br>SPC chart (min 20 data points)                                                                      |
| <b>Reported Indicator</b>         | % Patients with a provisional diagnosis of Asthma/Bronchoconstriction who were administered a B2 agonist                              |
| <b>Data Source</b>                | Patient Report Form                                                                                                                   |
| <b>Suggested Reporting Period</b> | Monthly<br>Quarterly<br>Annually                                                                                                      |
| <b>Recommended Review Period</b>  | Three years                                                                                                                           |

## C-AB-P-4 Patients with a provisional diagnosis of Asthma/Bronchoconstriction who were administered an anticholinergic bronchodilator

| Measure Code                      | C-AB-P-4                                                                                                                                    |
|-----------------------------------|---------------------------------------------------------------------------------------------------------------------------------------------|
| <b>Definition</b>                 | Patients with a provisional diagnosis of Asthma/Bronchoconstriction who were administered an anticholinergic bronchodilator                 |
| <b>Category</b>                   | Clinical                                                                                                                                    |
| <b>Subcategory</b>                | Asthma/Bronchoconstriction                                                                                                                  |
| <b>Measure Type</b>               | Process                                                                                                                                     |
| <b>Target Population</b>          | Adult<br>Medical                                                                                                                            |
| <b>Unit of Analysis</b>           | Clinician<br>Shift<br>Base<br>Service                                                                                                       |
| <b>Numerator Statement</b>        | Total number of patients with a provisional diagnosis of Asthma/Bronchoconstriction who were administered an anticholinergic bronchodilator |
| <b>Denominator Statement</b>      | Total number of patients with a provisional diagnosis of Asthma/Bronchoconstriction                                                         |
| <b>Case Mix/Risk Adjustment</b>   | Adult patients<br>Paediatric patients                                                                                                       |
| <b>Exclusion Criteria</b>         | Contraindication to Ipratropium bromide<br>Insufficient reporting data                                                                      |
| <b>Measure Calculation</b>        | Numerator/Denominator X 100 = %                                                                                                             |
| <b>Numerical Reporting Format</b> | Percentage (%)                                                                                                                              |
| <b>Graphical Reporting Format</b> | Run chart (min 10 data points)<br>SPC chart (min 20 data points)                                                                            |
| <b>Reported Indicator</b>         | % Patients with a provisional diagnosis of Asthma/Bronchoconstriction who were administered an anticholinergic bronchodilator               |
| <b>Data Source</b>                | Patient Report Form                                                                                                                         |
| <b>Suggested Reporting Period</b> | Monthly<br>Quarterly<br>Annually                                                                                                            |
| <b>Recommended Review Period</b>  | Three years                                                                                                                                 |

## C-AB-P-5 Patients with a provisional diagnosis of Asthma/Bronchoconstriction who were administered a corticosteroid

| Measure Code                      | C-AB-P-5                                                                                                                   |
|-----------------------------------|----------------------------------------------------------------------------------------------------------------------------|
| <b>Definition</b>                 | Patients with a provisional diagnosis of Asthma/Bronchoconstriction who were administered a corticosteroid                 |
| <b>Category</b>                   | Clinical                                                                                                                   |
| <b>Subcategory</b>                | Asthma/Bronchoconstriction                                                                                                 |
| <b>Measure Type</b>               | Process                                                                                                                    |
| <b>Target Population</b>          | Adult<br>Medical                                                                                                           |
| <b>Unit of Analysis</b>           | Clinician<br>Shift<br>Base<br>Service                                                                                      |
| <b>Numerator Statement</b>        | Total number of patients with a provisional diagnosis of Asthma/Bronchoconstriction who were administered a corticosteroid |
| <b>Denominator Statement</b>      | Total number of patients with a provisional diagnosis of Asthma/Bronchoconstriction                                        |
| <b>Case Mix/Risk Adjustment</b>   | Adult patients<br>Paediatric patients                                                                                      |
| <b>Exclusion Criteria</b>         | Contraindication to the Corticosteroid administered<br>Insufficient reporting data                                         |
| <b>Measure Calculation</b>        | Numerator/Denominator X 100 = %                                                                                            |
| <b>Numerical Reporting Format</b> | Percentage (%)                                                                                                             |
| <b>Graphical Reporting Format</b> | Run chart (min 10 data points)<br>SPC chart (min 20 data points)                                                           |
| <b>Reported Indicator</b>         | % Patients with a provisional diagnosis of Asthma/Bronchoconstriction who were administered a corticosteroid               |
| <b>Data Source</b>                | Patient Report Form                                                                                                        |
| <b>Suggested Reporting Period</b> | Monthly<br>Quarterly<br>Annually                                                                                           |
| <b>Recommended Review Period</b>  | Three years                                                                                                                |

**C-AB-P-6 Patients with a provisional diagnosis of Asthma/Bronchoconstriction recorded with documented severe wheezes/silent chest/BP < 90 mmHg systolic BP who were administered IM Adrenalin**

| Measure Code                      | C-AB-P-6                                                                                                                                                                                             |
|-----------------------------------|------------------------------------------------------------------------------------------------------------------------------------------------------------------------------------------------------|
| <b>Definition</b>                 | Patients with a provisional diagnosis of Asthma/Bronchoconstriction recorded with documented severe wheezes/silent chest/BP < 90 mmHg systolic BP who were administered IM Adrenalin                 |
| <b>Category</b>                   | Clinical                                                                                                                                                                                             |
| <b>Subcategory</b>                | Asthma/Bronchoconstriction                                                                                                                                                                           |
| <b>Measure Type</b>               | Process                                                                                                                                                                                              |
| <b>Target Population</b>          | Adult<br>Paediatric<br>Medical                                                                                                                                                                       |
| <b>Unit of Analysis</b>           | Clinician<br>Shift<br>Base<br>Service                                                                                                                                                                |
| <b>Numerator Statement</b>        | Total number of patients with a provisional diagnosis of Asthma/Bronchoconstriction recorded with documented severe wheezes/silent chest/BP < 90 mmHg systolic BP who were administered IM Adrenalin |
| <b>Denominator Statement</b>      | Total number of patients with a provisional diagnosis of Asthma/Bronchoconstriction                                                                                                                  |
| <b>Case Mix/Risk Adjustment</b>   | Adult patients<br>Paediatric patients                                                                                                                                                                |
| <b>Exclusion Criteria</b>         | Contraindication to Adrenaline<br>Insufficient reporting data                                                                                                                                        |
| <b>Measure Calculation</b>        | Numerator/Denominator X 100 = %                                                                                                                                                                      |
| <b>Numerical Reporting Format</b> | Percentage (%)                                                                                                                                                                                       |
| <b>Graphical Reporting Format</b> | Run chart (min 10 data points)<br>SPC chart (min 20 data points)                                                                                                                                     |
| <b>Reported Indicator</b>         | % Patients with a provisional diagnosis of Asthma/Bronchoconstriction recorded with documented severe wheezes/silent chest/BP < 90 mmHg systolic BP who were administered IM Adrenalin               |
| <b>Data Source</b>                | Patient Report Form                                                                                                                                                                                  |

Development of Clinical Quality and Performance Indicators for Emergency Medical Services in the Low to Middle Income Setting: The South African perspective

|                                   |                                  |
|-----------------------------------|----------------------------------|
| <b>Suggested Reporting Period</b> | Monthly<br>Quarterly<br>Annually |
| <b>Recommended Review Period</b>  | Three years                      |

## C-AB-P-7 Patients who received/met all components of the defined Asthma/bronchoconstriction composite bundle score

| Measure Code                      | C-AB-P-7                                                                                                                  |
|-----------------------------------|---------------------------------------------------------------------------------------------------------------------------|
| <b>Definition</b>                 | Patients who received/met all components of the defined Asthma/bronchoconstriction composite bundle score                 |
| <b>Category</b>                   | Clinical                                                                                                                  |
| <b>Subcategory</b>                | Asthma/Bronchoconstriction                                                                                                |
| <b>Measure Type</b>               | Process                                                                                                                   |
| <b>Target Population</b>          | Adult<br>Paediatric<br>Medical                                                                                            |
| <b>Unit of Analysis</b>           | Clinician<br>Shift<br>Base<br>Service                                                                                     |
| <b>Numerator Statement</b>        | Total number of patients who received/met all components of the defined Asthma/bronchoconstriction composite bundle score |
| <b>Denominator Statement</b>      | Determined based on Asthma/bronchoconstriction composite bundle score items                                               |
| <b>Case Mix/Risk Adjustment</b>   | Adult patients<br>Paediatric patients                                                                                     |
| <b>Exclusion Criteria</b>         | Insufficient reporting data                                                                                               |
| <b>Measure Calculation</b>        | Numerator/Denominator X 100 = %                                                                                           |
| <b>Numerical Reporting Format</b> | Percentage (%)                                                                                                            |
| <b>Graphical Reporting Format</b> | Run chart (min 10 data points)<br>SPC chart (min 20 data points)                                                          |
| <b>Reported Indicator</b>         | % Patients who received/met all components of the defined Asthma/bronchoconstriction composite bundle score               |
| <b>Data Source</b>                | Patient Report Form                                                                                                       |
| <b>Suggested Reporting Period</b> | Monthly<br>Quarterly<br>Annually                                                                                          |
| <b>Recommended Review Period</b>  | Three years                                                                                                               |



## **Section 1: Clinical Domain**

### **Part 6: Burns**

- C-Bu-P-1 Patients with a provisional diagnosis of Burns with burns dressings applied
- C-Bu-P-2 Patients with a provisional diagnosis of Burns with body surface area and burns type assessed and recorded

## C-Bu-P-1 Patients with a provisional diagnosis of Burns with burns dressings applied

| Measure Code                      | C-Bu-P-1                                                                                         |
|-----------------------------------|--------------------------------------------------------------------------------------------------|
| <b>Definition</b>                 | Patients with a provisional diagnosis of Burns with burns dressings applied                      |
| <b>Category</b>                   | Clinical                                                                                         |
| <b>Subcategory</b>                | Burns                                                                                            |
| <b>Measure Type</b>               | Process                                                                                          |
| <b>Target Population</b>          | Adult<br>Paediatric<br>Trauma                                                                    |
| <b>Unit of Analysis</b>           | Clinician<br>Shift<br>Base<br>Service                                                            |
| <b>Denominator Statement</b>      | Total number of patients with a provisional diagnosis of Burns                                   |
| <b>Case Mix/Risk Adjustment</b>   | Adult patients<br>Paediatric patients<br>Primary (Community) calls<br>Secondary (Transfer) calls |
| <b>Exclusion Criteria</b>         | Insufficient reporting data                                                                      |
| <b>Measure Calculation</b>        | Numerator/Denominator X 100 = %                                                                  |
| <b>Numerical Reporting Format</b> | Percentage (%)                                                                                   |
| <b>Graphical Reporting Format</b> | Run chart (min 10 data points)<br>SPC chart (min 20 data points)                                 |
| <b>Reported Indicator</b>         | % Patients with a provisional diagnosis of Burns with burns dressings applied                    |
| <b>Data Source</b>                | Patient Report Form                                                                              |
| <b>Suggested Reporting Period</b> | Monthly<br>Quarterly<br>Annually                                                                 |
| <b>Recommended Review Period</b>  | Three years                                                                                      |

## C-Bu-P-2 Patients with a provisional diagnosis of Burns with body surface area and burns type assessed and recorded

| Measure Code                      | C-Bu-P-2                                                                                                     |
|-----------------------------------|--------------------------------------------------------------------------------------------------------------|
| <b>Definition</b>                 | Patients with a provisional diagnosis of Burns with body surface area and burns type assessed and recorded   |
| <b>Category</b>                   | Clinical                                                                                                     |
| <b>Subcategory</b>                | Burns                                                                                                        |
| <b>Measure Type</b>               | Process                                                                                                      |
| <b>Target Population</b>          | Adult<br>Paediatric<br>Trauma                                                                                |
| <b>Unit of Analysis</b>           | Clinician<br>Shift<br>Base<br>Service                                                                        |
| <b>Denominator Statement</b>      | Total number of patients with a provisional diagnosis of Burns                                               |
| <b>Case Mix/Risk Adjustment</b>   | Adult patients<br>Paediatric patients<br>Primary (Community) calls<br>Secondary (Transfer) calls             |
| <b>Exclusion Criteria</b>         | Insufficient reporting data                                                                                  |
| <b>Measure Calculation</b>        | Numerator/Denominator X 100 = %                                                                              |
| <b>Numerical Reporting Format</b> | Percentage (%)                                                                                               |
| <b>Graphical Reporting Format</b> | Run chart (min 10 data points)<br>SPC chart (min 20 data points)                                             |
| <b>Reported Indicator</b>         | % Patients with a provisional diagnosis of Burns with body surface area and burns type assessed and recorded |
| <b>Data Source</b>                | Patient Report Form                                                                                          |
| <b>Suggested Reporting Period</b> | Monthly<br>Quarterly<br>Annually                                                                             |
| <b>Recommended Review Period</b>  | Three years                                                                                                  |

## Section 1: Clinical Category

### Part 7: General

- C-Ge-S-1 Serviceable suction unit devices available per defined area and/or time period
- C-Ge-S-2 Serviceable 3 lead ECG monitoring devices available per defined area and/or time period
- C-Ge-S-3 Serviceable 12 lead ECG monitoring devices available per defined area and/or time period
- C-Ge-S-4 Serviceable portable oxygen cylinders available per defined area and/or time period
- C-Ge-S-5 Serviceable Defibrillator/AED devices available per defined area and/or time period
- C-Ge-S-6 Serviceable mechanical ventilators available per defined area and/or time period
- C-Ge-P-1 Patients with reduced level of consciousness with a blood glucose measured
- C-Ge-P-2 Patients with a recorded SpO<sub>2</sub> < 95% who were administered supplemental Oxygen
- C-Ge-P-3 Patients with a provisional diagnosis recorded

## C-Ge-S-1 Serviceable suction unit devices available per defined area and/or time period

| Measure Code                      | C-Ge-S-1                                                                                       |
|-----------------------------------|------------------------------------------------------------------------------------------------|
| <b>Definition</b>                 | Serviceable suction unit devices available per defined area and/or time period                 |
| <b>Category</b>                   | Clinical                                                                                       |
| <b>Subcategory</b>                | General                                                                                        |
| <b>Measure Type</b>               | Structure                                                                                      |
| <b>Target Population</b>          | Shift<br>Base<br>Service                                                                       |
| <b>Unit of Analysis</b>           | Shift<br>Base<br>Service                                                                       |
| <b>Numerator Statement</b>        | Total number of serviceable suction unit devices available per defined area and/or time period |
| <b>Denominator Statement</b>      | Total number of in-service vehicles per equivalent defined area and/or time period             |
| <b>Case Mix/Risk Adjustment</b>   | ALS units<br>Non-ALS units                                                                     |
| <b>Exclusion Criteria</b>         | Insufficient reporting data                                                                    |
| <b>Measure Calculation</b>        | $\text{Numerator/Denominator} \times 100 = \text{Rate per 100 vehicles}$                       |
| <b>Numerical Reporting Format</b> | Per 100 vehicles                                                                               |
| <b>Graphical Reporting Format</b> | Run chart (min 10 data points)<br>SPC chart (min 20 data points)                               |
| <b>Reported Indicator</b>         | Serviceable suction unit devices available per 100 vehicles                                    |
| <b>Data Source</b>                | Vehicle checklist<br>Capital equipment storeroom checklist                                     |
| <b>Suggested Reporting Period</b> | Monthly<br>Quarterly<br>Annually                                                               |
| <b>Recommended Review Period</b>  | Three years                                                                                    |

## C-Ge-S-2 Serviceable 3 lead ECG monitoring devices available per defined area and/or time period

| Measure Code                      | C-Ge-S-2                                                                                                |
|-----------------------------------|---------------------------------------------------------------------------------------------------------|
| <b>Definition</b>                 | Serviceable 3 lead ECG monitoring devices available per defined area and/or time period                 |
| <b>Category</b>                   | Clinical                                                                                                |
| <b>Subcategory</b>                | General                                                                                                 |
| <b>Measure Type</b>               | Structure                                                                                               |
| <b>Target Population</b>          | Shift<br>Base<br>Service                                                                                |
| <b>Unit of Analysis</b>           | Shift<br>Base<br>Service                                                                                |
| <b>Numerator Statement</b>        | Total number of serviceable 3 lead ECG monitoring devices available per defined area and/or time period |
| <b>Denominator Statement</b>      | Total number of in-service vehicles per equivalent defined area and/or time period                      |
| <b>Case Mix/Risk Adjustment</b>   | ALS units<br>Non-ALS units                                                                              |
| <b>Exclusion Criteria</b>         | Insufficient reporting data                                                                             |
| <b>Measure Calculation</b>        | $\text{Numerator/Denominator} \times 100 = \text{Rate per 100 vehicles}$                                |
| <b>Numerical Reporting Format</b> | Per 100 vehicles                                                                                        |
| <b>Graphical Reporting Format</b> | Run chart (min 10 data points)<br>SPC chart (min 20 data points)                                        |
| <b>Reported Indicator</b>         | Serviceable 3 lead ECG monitoring devices per 100 vehicles                                              |
| <b>Data Source</b>                | Vehicle checklist<br>Capital equipment storeroom checklist                                              |
| <b>Suggested Reporting Period</b> | Monthly<br>Quarterly<br>Annually                                                                        |
| <b>Recommended Review Period</b>  | Three years                                                                                             |

### C-Ge-S-3 Serviceable 12 lead ECG monitoring devices available per defined area and/or time period

| Measure Code                      | C-Ge-S-3                                                                                                 |
|-----------------------------------|----------------------------------------------------------------------------------------------------------|
| <b>Definition</b>                 | Serviceable 12 lead ECG monitoring devices available per defined area and/or time period                 |
| <b>Category</b>                   | Clinical                                                                                                 |
| <b>Subcategory</b>                | General                                                                                                  |
| <b>Measure Type</b>               | Structure                                                                                                |
| <b>Target Population</b>          | Shift<br>Base<br>Service                                                                                 |
| <b>Unit of Analysis</b>           | Shift<br>Base<br>Service                                                                                 |
| <b>Numerator Statement</b>        | Total number of serviceable 12 lead ECG monitoring devices available per defined area and/or time period |
| <b>Denominator Statement</b>      | Total number of in-service vehicles per equivalent defined area and/or time period                       |
| <b>Case Mix/Risk Adjustment</b>   | ALS units<br>Non-ALS units                                                                               |
| <b>Exclusion Criteria</b>         | Insufficient reporting data                                                                              |
| <b>Measure Calculation</b>        | $\text{Numerator/Denominator} \times 100 = \text{Rate per 100 vehicles}$                                 |
| <b>Numerical Reporting Format</b> | Per 100 vehicles                                                                                         |
| <b>Graphical Reporting Format</b> | Run chart (min 10 data points)<br>SPC chart (min 20 data points)                                         |
| <b>Reported Indicator</b>         | Serviceable 12 lead ECG monitoring devices available per 100 vehicles                                    |
| <b>Data Source</b>                | Vehicle checklist<br>Capital equipment storeroom checklist                                               |
| <b>Suggested Reporting Period</b> | Monthly<br>Quarterly<br>Annually                                                                         |
| <b>Recommended Review Period</b>  | Three years                                                                                              |

## C-Ge-S-4 Serviceable portable oxygen cylinders available per defined area and/or time period

| Measure Code                      | C-Ge-S-4                                                                                            |
|-----------------------------------|-----------------------------------------------------------------------------------------------------|
| <b>Definition</b>                 | Serviceable portable oxygen cylinders available per defined area and/or time period                 |
| <b>Category</b>                   | Clinical                                                                                            |
| <b>Subcategory</b>                | General                                                                                             |
| <b>Measure Type</b>               | Structure                                                                                           |
| <b>Target Population</b>          | Shift<br>Base<br>Service                                                                            |
| <b>Unit of Analysis</b>           | Shift<br>Base<br>Service                                                                            |
| <b>Numerator Statement</b>        | Total number of serviceable portable oxygen cylinders available per defined area and/or time period |
| <b>Denominator Statement</b>      | Total number of in-service vehicles per equivalent defined area and/or time period                  |
| <b>Case Mix/Risk Adjustment</b>   | ALS units<br>Non-ALS units                                                                          |
| <b>Exclusion Criteria</b>         | Insufficient reporting data                                                                         |
| <b>Measure Calculation</b>        | $\text{Numerator/Denominator} \times 100 = \text{Rate per 100 vehicles}$                            |
| <b>Numerical Reporting Format</b> | Per 100 vehicles                                                                                    |
| <b>Graphical Reporting Format</b> | Run chart (min 10 data points)<br>SPC chart (min 20 data points)                                    |
| <b>Reported Indicator</b>         | Serviceable portable oxygen cylinders available per 100 vehicles                                    |
| <b>Data Source</b>                | Vehicle checklist<br>Capital equipment storeroom checklist                                          |
| <b>Suggested Reporting Period</b> | Monthly<br>Quarterly<br>Annually                                                                    |
| <b>Recommended Review Period</b>  | Three years                                                                                         |



## C-Ge-S-5 Serviceable Defibrillator/AED devices available per defined area and/or time period

| Measure Code                      | C-Ge-S-5                                                                                            |
|-----------------------------------|-----------------------------------------------------------------------------------------------------|
| <b>Definition</b>                 | Serviceable Defibrillator/AED devices available per defined area and/or time period                 |
| <b>Category</b>                   | Clinical                                                                                            |
| <b>Subcategory</b>                | General                                                                                             |
| <b>Measure Type</b>               | Structure                                                                                           |
| <b>Target Population</b>          | Shift<br>Base<br>Service                                                                            |
| <b>Unit of Analysis</b>           | Shift<br>Base<br>Service                                                                            |
| <b>Numerator Statement</b>        | Total number of serviceable Defibrillator/AED devices available per defined area and/or time period |
| <b>Denominator Statement</b>      | Total number of in-service vehicles per equivalent defined area and/or time period                  |
| <b>Case Mix/Risk Adjustment</b>   | ALS units<br>Non-ALS units                                                                          |
| <b>Exclusion Criteria</b>         | Insufficient reporting data                                                                         |
| <b>Measure Calculation</b>        | $\text{Numerator/Denominator} \times 100 = \text{Rate per 100 vehicles}$                            |
| <b>Numerical Reporting Format</b> | Per 100 vehicles                                                                                    |
| <b>Graphical Reporting Format</b> | Run chart (min 10 data points)<br>SPC chart (min 20 data points)                                    |
| <b>Reported Indicator</b>         | Serviceable Defibrillator/AED devices per 100 vehicles                                              |
| <b>Data Source</b>                | Vehicle checklist<br>Capital equipment storeroom checklist                                          |
| <b>Suggested Reporting Period</b> | Monthly<br>Quarterly<br>Annually                                                                    |
| <b>Recommended Review Period</b>  | Three years                                                                                         |

## C-Ge-S-6 Serviceable mechanical ventilators available per defined area and/or time period

| Measure Code                      | C-Ge-S-6                                                                                         |
|-----------------------------------|--------------------------------------------------------------------------------------------------|
| <b>Definition</b>                 | Serviceable mechanical ventilators available per defined area and/or time period                 |
| <b>Category</b>                   | Clinical                                                                                         |
| <b>Subcategory</b>                | General                                                                                          |
| <b>Measure Type</b>               | Structure                                                                                        |
| <b>Target Population</b>          | Shift<br>Base<br>Service                                                                         |
| <b>Unit of Analysis</b>           | Shift<br>Base<br>Service                                                                         |
| <b>Numerator Statement</b>        | Total number of serviceable mechanical ventilators available per defined area and/or time period |
| <b>Denominator Statement</b>      | Total number of in-service vehicles per equivalent defined area and/or time period               |
| <b>Case Mix/Risk Adjustment</b>   | Nil                                                                                              |
| <b>Exclusion Criteria</b>         | Insufficient reporting data                                                                      |
| <b>Measure Calculation</b>        | Numerator/Denominator X 100 = Rate per 100 vehicles                                              |
| <b>Numerical Reporting Format</b> | Per 100 vehicles                                                                                 |
| <b>Graphical Reporting Format</b> | Run chart (min 10 data points)<br>SPC chart (min 20 data points)                                 |
| <b>Reported Indicator</b>         | Serviceable mechanical ventilators available per 100 vehicles                                    |
| <b>Data Source</b>                | Vehicle checklist<br>Capital equipment storeroom checklist                                       |
| <b>Suggested Reporting Period</b> | Monthly<br>Quarterly<br>Annually                                                                 |
| <b>Recommended Review Period</b>  | Three years                                                                                      |

## C-Ge-P-1 Patients with reduced level of consciousness with a blood glucose measured

| Measure Code                      | C-Ge-P-1                                                                                         |
|-----------------------------------|--------------------------------------------------------------------------------------------------|
| <b>Definition</b>                 | Patients with reduced level of consciousness with a blood glucose measured                       |
| <b>Category</b>                   | Clinical                                                                                         |
| <b>Subcategory</b>                | General                                                                                          |
| <b>Measure Type</b>               | Process                                                                                          |
| <b>Target Population</b>          | Adult patients<br>Paediatric patients<br>Medical patients<br>Trauma patients                     |
| <b>Unit of Analysis</b>           | Clinician<br>Shift<br>Base<br>Service                                                            |
| <b>Numerator Statement</b>        | Total number of patients with reduced level of consciousness with a blood glucose measured       |
| <b>Denominator Statement</b>      | Total number of patients with reduced level of consciousness                                     |
| <b>Case Mix/Risk Adjustment</b>   | Adult patients<br>Paediatric patients<br>Primary (Community) calls<br>Secondary (Transfer) calls |
| <b>Exclusion Criteria</b>         | Insufficient reporting data                                                                      |
| <b>Measure Calculation</b>        | Numerator/Denominator X 100 = %                                                                  |
| <b>Numerical Reporting Format</b> | Percentage (%)                                                                                   |
| <b>Graphical Reporting Format</b> | Run chart (min 10 data points)<br>SPC chart (min 20 data points)                                 |
| <b>Reported Indicator</b>         | Patients with reduced level of consciousness with blood glucose measurement                      |
| <b>Data Source</b>                | Patient Report Form                                                                              |
| <b>Suggested Reporting Period</b> | Monthly<br>Quarterly<br>Annually                                                                 |
| <b>Recommended Review Period</b>  | Three years                                                                                      |

## C-Ge-P-2 Patients with a recorded SpO2 < 95% who were administered supplemental Oxygen

| Measure Code                      | C-Ge-P-2                                                                                                                                                                      |
|-----------------------------------|-------------------------------------------------------------------------------------------------------------------------------------------------------------------------------|
| <b>Definition</b>                 | Patients with a recorded SpO2 < 95% who were administered supplemental Oxygen                                                                                                 |
| <b>Category</b>                   | Clinical                                                                                                                                                                      |
| <b>Subcategory</b>                | General                                                                                                                                                                       |
| <b>Measure Type</b>               | Process                                                                                                                                                                       |
| <b>Target Population</b>          | Adult patients<br>Paediatric patients<br>Medical patients<br>Trauma patients                                                                                                  |
| <b>Unit of Analysis</b>           | Clinician<br>Shift<br>Base<br>Service                                                                                                                                         |
| <b>Numerator Statement</b>        | Total number of patients with a recorded SpO2 < 95% who were administered supplemental Oxygen                                                                                 |
| <b>Denominator Statement</b>      | Total number of patients with SpO2 < 95%                                                                                                                                      |
| <b>Case Mix/Risk Adjustment</b>   | Adult patients<br>Paediatric patients<br>Medical patients<br>Trauma patients<br>Primary (Community) calls<br>Secondary (Transfer) calls<br>ACS/STEMI patients<br>APO patients |
| <b>Exclusion Criteria</b>         | Insufficient reporting data                                                                                                                                                   |
| <b>Measure Calculation</b>        | Numerator/Denominator X 100 = %                                                                                                                                               |
| <b>Numerical Reporting Format</b> | Percentage (%)                                                                                                                                                                |
| <b>Graphical Reporting Format</b> | Run chart (min 10 data points)<br>SPC chart (min 20 data points)                                                                                                              |
| <b>Reported Indicator</b>         | % Patients with a recorded SpO2 < 95% who were administered supplemental Oxygen                                                                                               |
| <b>Data Source</b>                | Patient Report Form                                                                                                                                                           |
| <b>Suggested Reporting Period</b> | Monthly<br>Quarterly<br>Annually                                                                                                                                              |
| <b>Recommended Review Period</b>  | Three years                                                                                                                                                                   |

### C-Ge-P-3 Patients with a provisional diagnosis recorded

| Measure Code                      | C-G-P-3                                                                       |
|-----------------------------------|-------------------------------------------------------------------------------|
| <b>Definition</b>                 | Patients with a provisional diagnosis recorded                                |
| <b>Category</b>                   | Clinical                                                                      |
| <b>Subcategory</b>                | General                                                                       |
| <b>Measure Type</b>               | Process                                                                       |
| <b>Target Population</b>          | Adult patients<br>Paediatric patients<br>Medical patients<br>Trauma patients  |
| <b>Unit of Analysis</b>           | Clinician<br>Shift<br>Base<br>Service                                         |
| <b>Numerator Statement</b>        | Total number of patients with a provisional diagnosis recorded                |
| <b>Denominator Statement</b>      | Total number of patients transported by EMS                                   |
| <b>Case Mix/Risk Adjustment</b>   | Nil                                                                           |
| <b>Exclusion Criteria</b>         | Insufficient reporting data                                                   |
| <b>Measure Calculation</b>        | Numerator/Denominator X 100 = %                                               |
| <b>Numerical Reporting Format</b> | Percentage (%)                                                                |
| <b>Graphical Reporting Format</b> | Run chart (min 10 data points)<br>SPC chart (min 20 data points)              |
| <b>Reported Indicator</b>         | % Patients with reduced level of consciousness with blood glucose measurement |
| <b>Data Source</b>                | Patient Report Form                                                           |
| <b>Suggested Reporting Period</b> | Monthly<br>Quarterly<br>Annually                                              |
| <b>Recommended Review Period</b>  | Three years                                                                   |

## **Section 1: Clinical Domain**

### **Part 8: Hypoglycaemia**

- C-Hy-P-1 Patients with a blood glucose level < 5 mmol who were administered Glucose
- C-Hy-P-2 Blood glucose measurement post intervention

## C-Hy-P-1 Patients with a blood glucose level < 5 mmol who were administered Glucose

| Measure Code                      | C-Hy-P-1                                                                                         |
|-----------------------------------|--------------------------------------------------------------------------------------------------|
| <b>Definition</b>                 | Patients with a blood glucose level < 5 mmol who were administered Glucose                       |
| <b>Category</b>                   | Clinical                                                                                         |
| <b>Subcategory</b>                | Hypoglycaemia                                                                                    |
| <b>Measure Type</b>               | Process                                                                                          |
| <b>Target Population</b>          | Adult patients<br>Paediatric patients<br>Medical patients                                        |
| <b>Unit of Analysis</b>           | Clinician<br>Shift<br>Base<br>Service                                                            |
| <b>Denominator Statement</b>      | Total number of patients with a blood glucose level < 5 mmol recorded                            |
| <b>Case Mix/Risk Adjustment</b>   | Adult patients<br>Paediatric patients<br>Primary (Community) calls<br>Secondary (Transfer) calls |
| <b>Exclusion Criteria</b>         | Insufficient reporting data                                                                      |
| <b>Measure Calculation</b>        | Numerator/Denominator X 100 = %                                                                  |
| <b>Numerical Reporting Format</b> | Percentage (%)                                                                                   |
| <b>Graphical Reporting Format</b> | Run chart (min 10 data points)<br>SPC chart (min 20 data points)                                 |
| <b>Reported Indicator</b>         | % Patients with a blood glucose level < 5 mmol who were administered Glucose                     |
| <b>Data Source</b>                | Patient Report Form                                                                              |
| <b>Suggested Reporting Period</b> | Monthly<br>Quarterly<br>Annually                                                                 |
| <b>Recommended Review Period</b>  | Three years                                                                                      |

## C-Hy-P-2 Patients with a blood glucose level measured and recorded following Glucose administration

| Measure Code                      | C-Hy-P-2                                                                                         |
|-----------------------------------|--------------------------------------------------------------------------------------------------|
| <b>Definition</b>                 | Patients with a blood glucose level measured and recorded following Glucose administration       |
| <b>Category</b>                   | Clinical                                                                                         |
| <b>Subcategory</b>                | Hypoglycaemia                                                                                    |
| <b>Measure Type</b>               | Process                                                                                          |
| <b>Target Population</b>          | Adult patients<br>Paediatric patients<br>Medical patients                                        |
| <b>Unit of Analysis</b>           | Clinician<br>Shift<br>Base<br>Service                                                            |
| <b>Denominator Statement</b>      | Total number of patients with Glucose administered                                               |
| <b>Case Mix/Risk Adjustment</b>   | Adult patients<br>Paediatric patients<br>Primary (Community) calls<br>Secondary (Transfer) calls |
| <b>Exclusion Criteria</b>         | Insufficient reporting data                                                                      |
| <b>Measure Calculation</b>        | Numerator/Denominator X 100 = %                                                                  |
| <b>Numerical Reporting Format</b> | Percentage (%)                                                                                   |
| <b>Graphical Reporting Format</b> | Run chart (min 10 data points)<br>SPC chart (min 20 data points)                                 |
| <b>Reported Indicator</b>         | % Patients with a blood glucose level measured and recorded following Glucose administration     |
| <b>Data Source</b>                | Patient Report Form                                                                              |
| <b>Suggested Reporting Period</b> | Monthly<br>Quarterly<br>Annually                                                                 |
| <b>Recommended Review Period</b>  | Three years                                                                                      |



## **Section 1: Clinical Category**

### **Part 9: Neonates/Paediatrics**

- C-NP-P-1 One min APGAR score assessed and recorded for new-born patients
- C-NP-P-2 Five min APGAR score assessed and recorded for new-born patients
- C-NP-P-3 Paediatric patients with Croup who were administered oral/inhaled steroids
- C-NP-P-4 Paediatric patients with Croup who were administered nebulised Adrenalin
- C-NP-P-5 Patient transportation to a facility with specialist Paediatric capabilities/resources

## C-NP-P-1 One min APGAR score assessed and recorded for new-born patients

| Measure Code                      | C-NP-P-1                                                                          |
|-----------------------------------|-----------------------------------------------------------------------------------|
| <b>Definition</b>                 | One min APGAR score assessed and recorded for new-born patients                   |
| <b>Category</b>                   | Clinical                                                                          |
| <b>Subcategory</b>                | Neonate/Paediatric                                                                |
| <b>Measure Type</b>               | Process                                                                           |
| <b>Target Population</b>          | Paediatric patients<br>Medical patients                                           |
| <b>Unit of Analysis</b>           | Clinician<br>Shift<br>Base<br>Service                                             |
| <b>Numerator Statement</b>        | Total number of newborn patients with a one min APGAR score assessed and recorded |
| <b>Denominator Statement</b>      | Total number of new-born patients treated and/or transported                      |
| <b>Case Mix/Risk Adjustment</b>   | Primary (Community) calls<br>Secondary (Transfer) calls                           |
| <b>Exclusion Criteria</b>         | Non-Neonate patients<br>Insufficient reporting data                               |
| <b>Measure Calculation</b>        | Numerator/Denominator X 100 = %                                                   |
| <b>Numerical Reporting Format</b> | Percentage (%)                                                                    |
| <b>Graphical Reporting Format</b> | Run chart (min 10 data points)<br>SPC chart (min 20 data points)                  |
| <b>Reported Indicator</b>         | % Neonatal patients with a one min APGAR score assessed and recorded              |
| <b>Data Source</b>                | Patient Report Form                                                               |
| <b>Suggested Reporting Period</b> | Monthly<br>Quarterly<br>Annually                                                  |
| <b>Recommended Review Period</b>  | Three years                                                                       |

## C-NP-P-2 Five min APGAR score assessed and recorded for new-born patients

| Measure Code                      | C-NP-P-2                                                                           |
|-----------------------------------|------------------------------------------------------------------------------------|
| <b>Definition</b>                 | Five min APGAR score assessed and recorded for new-born patients                   |
| <b>Category</b>                   | Clinical                                                                           |
| <b>Subcategory</b>                | Neonate/Paediatric                                                                 |
| <b>Measure Type</b>               | Process                                                                            |
| <b>Target Population</b>          | Paediatric patients<br>Medical patients                                            |
| <b>Unit of Analysis</b>           | Clinician<br>Shift<br>Base<br>Service                                              |
| <b>Numerator Statement</b>        | Total number of newborn patients with a five min APGAR score assessed and recorded |
| <b>Denominator Statement</b>      | Total number of new-born patients treated and/or transported                       |
| <b>Case Mix/Risk Adjustment</b>   | Primary (Community) calls<br>Secondary (Transfer) calls                            |
| <b>Exclusion Criteria</b>         | Non-Neonate patients<br>Insufficient reporting data                                |
| <b>Measure Calculation</b>        | Numerator/Denominator X 100 = %                                                    |
| <b>Numerical Reporting Format</b> | Percentage (%)                                                                     |
| <b>Graphical Reporting Format</b> | Run chart (min 10 data points)<br>SPC chart (min 20 data points)                   |
| <b>Reported Indicator</b>         | % Neonatal patients with a five min APGAR score assessed and recorded              |
| <b>Data Source</b>                | Patient Report Form                                                                |
| <b>Suggested Reporting Period</b> | Monthly<br>Quarterly<br>Annually                                                   |
| <b>Recommended Review Period</b>  | Three years                                                                        |

### C-NP-P-3 Paediatric patients with Croup who were administered oral/inhaled steroids

| Measure Code                      | C-NP-P-3                                                                                   |
|-----------------------------------|--------------------------------------------------------------------------------------------|
| <b>Definition</b>                 | Paediatric patients with Croup who were administered oral/inhaled steroids                 |
| <b>Category</b>                   | Clinical                                                                                   |
| <b>Subcategory</b>                | Neonate/Paediatric                                                                         |
| <b>Measure Type</b>               | Process                                                                                    |
| <b>Target Population</b>          | Paediatric patients<br>Medical patients                                                    |
| <b>Unit of Analysis</b>           | Clinician<br>Shift<br>Base<br>Service                                                      |
| <b>Numerator Statement</b>        | Total number of paediatric patients with Croup who were administered oral/inhaled steroids |
| <b>Denominator Statement</b>      | Total number of Paediatric patients with Croup                                             |
| <b>Case Mix/Risk Adjustment</b>   | Primary (Community) calls<br>Secondary (Transfer) calls                                    |
| <b>Exclusion Criteria</b>         | Adult patients<br>Insufficient reporting data                                              |
| <b>Measure Calculation</b>        | Numerator/Denominator X 100 = %                                                            |
| <b>Numerical Reporting Format</b> | Percentage (%)                                                                             |
| <b>Graphical Reporting Format</b> | Run chart (min 10 data points)<br>SPC chart (min 20 data points)                           |
| <b>Reported Indicator</b>         | % Paediatric patients with Croup who were administered oral/inhaled steroids               |
| <b>Data Source</b>                | Patient Report Form                                                                        |
| <b>Suggested Reporting Period</b> | Monthly<br>Quarterly<br>Annually                                                           |
| <b>Recommended Review Period</b>  | Three years                                                                                |

## C-NP-P-4 Paediatric patients with Croup who were administered nebulised Adrenalin

| Measure Code                      | C-NP-P-4                                                                                 |
|-----------------------------------|------------------------------------------------------------------------------------------|
| <b>Definition</b>                 | Paediatric patients with Croup who were administered nebulised Adrenalin                 |
| <b>Category</b>                   | Clinical                                                                                 |
| <b>Subcategory</b>                | Neonate/Paediatric                                                                       |
| <b>Measure Type</b>               | Process                                                                                  |
| <b>Target Population</b>          | Paediatric patients<br>Medical patients                                                  |
| <b>Unit of Analysis</b>           | Clinician<br>Shift<br>Base<br>Service                                                    |
| <b>Numerator Statement</b>        | Total number of paediatric patients with Croup who were administered nebulised Adrenalin |
| <b>Denominator Statement</b>      | Total number of Paediatric patients with Croup                                           |
| <b>Case Mix/Risk Adjustment</b>   | Primary (Community) calls<br>Secondary (Transfer) calls                                  |
| <b>Exclusion Criteria</b>         | Adult patients<br>Insufficient reporting data                                            |
| <b>Measure Calculation</b>        | Numerator/Denominator X 100 = %                                                          |
| <b>Numerical Reporting Format</b> | Percentage (%)                                                                           |
| <b>Graphical Reporting Format</b> | Run chart (min 10 data points)<br>SPC chart (min 20 data points)                         |
| <b>Reported Indicator</b>         | % Paediatric patients with Croup who were administered nebulised Adrenalin               |
| <b>Data Source</b>                | Patient Report Form                                                                      |
| <b>Suggested Reporting Period</b> | Monthly<br>Quarterly<br>Annually                                                         |
| <b>Recommended Review Period</b>  | Three years                                                                              |

## C-NP-P-5 Patient transportation to a facility with specialist Paediatric capabilities/resources

| Measure Code                      | C-NP-P-5                                                                                                         |
|-----------------------------------|------------------------------------------------------------------------------------------------------------------|
| <b>Definition</b>                 | Patient transportation to a facility with specialist Paediatric capabilities/resources                           |
| <b>Category</b>                   | Clinical                                                                                                         |
| <b>Subcategory</b>                | Neonate/Paediatric                                                                                               |
| <b>Measure Type</b>               | Process                                                                                                          |
| <b>Target Population</b>          | Paediatric patients<br>Medical patients<br>Trauma patients                                                       |
| <b>Unit of Analysis</b>           | Shift<br>Base<br>Service                                                                                         |
| <b>Numerator Statement</b>        | Total number of patient transports to a facility with specialist Paediatric capabilities/resources               |
| <b>Denominator Statement</b>      | Total number of Paediatric patients treated and/or transported by EMS personnel                                  |
| <b>Case Mix/Risk Adjustment</b>   | Primary (Community) calls<br>Secondary (Transfer) calls<br>defined location criteria (i.e.: Urban vs Rural etc.) |
| <b>Exclusion Criteria</b>         | Adult patients<br>Insufficient reporting data                                                                    |
| <b>Measure Calculation</b>        | Numerator/Denominator X 100 = %                                                                                  |
| <b>Numerical Reporting Format</b> | Percentage (%)                                                                                                   |
| <b>Graphical Reporting Format</b> | Run chart (min 10 data points)<br>SPC chart (min 20 data points)                                                 |
| <b>Reported Indicator</b>         | % Paediatric patients transported by EMS delivered to facility with Paediatric care resources                    |
| <b>Data Source</b>                | Patient Report Form                                                                                              |
| <b>Suggested Reporting Period</b> | Monthly<br>Quarterly<br>Annually                                                                                 |
| <b>Recommended Review Period</b>  | Three years                                                                                                      |

## **Section 1: Clinical Domain**

### **Part 10: Obstetrics**

- C-Ob-P-1 Obstetric patients who deliver prior to EMS arrival
- C-Ob-P-2 Obstetric patients with postpartum haemorrhage who were administered TXA
- C-Ob-P-3 Obstetric patients with a provisional diagnosis of Eclampsia or Pre-eclampsia who were administered Mag sulphate
- C-Ob-P-4 Obstetric patients who deliver during EMS care

## C-Ob-P-1 Obstetric patients who deliver prior to EMS arrival

| Measure Code                      | C-Ob-P-1                                                         |
|-----------------------------------|------------------------------------------------------------------|
| <b>Definition</b>                 | Obstetric patients who deliver prior to EMS arrival              |
| <b>Category</b>                   | Clinical                                                         |
| <b>Subcategory</b>                | Obstetric                                                        |
| <b>Measure Type</b>               | Process                                                          |
| <b>Target Population</b>          | Adult patients<br>Medical patients                               |
| <b>Unit of Analysis</b>           | Shift<br>Base<br>Service                                         |
| <b>Denominator Statement</b>      | Total number of Obstetric patients transported by EMS            |
| <b>Case Mix/Risk Adjustment</b>   | Primary (Community) calls<br>Secondary (Transfer) calls          |
| <b>Exclusion Criteria</b>         | Non-Obstetric patients<br>Insufficient reporting data            |
| <b>Measure Calculation</b>        | Numerator/Denominator X 100 = %                                  |
| <b>Numerical Reporting Format</b> | Percentage (%)                                                   |
| <b>Graphical Reporting Format</b> | Run chart (min 10 data points)<br>SPC chart (min 20 data points) |
| <b>Reported Indicator</b>         | % Obstetric patients who deliver prior to EMS arrival (BBA)      |
| <b>Data Source</b>                | Patient Report Form                                              |
| <b>Suggested Reporting Period</b> | Monthly<br>Quarterly<br>Annually                                 |
| <b>Recommended Review Period</b>  | Three years                                                      |



## C-Ob-P-2 Obstetric patients with postpartum haemorrhage who were administered TXA

| Measure Code                      | C-Ob-P-2                                                                          |
|-----------------------------------|-----------------------------------------------------------------------------------|
| <b>Definition</b>                 | Obstetric patients with postpartum haemorrhage who were administered TXA          |
| <b>Category</b>                   | Clinical                                                                          |
| <b>Subcategory</b>                | Obstetric                                                                         |
| <b>Measure Type</b>               | Process                                                                           |
| <b>Target Population</b>          | Adult patients<br>Medical patients                                                |
| <b>Unit of Analysis</b>           | Clinician<br>Shift<br>Base<br>Service                                             |
| <b>Denominator Statement</b>      | Total number of Obstetric patients with postpartum haemorrhage transported by EMS |
| <b>Case Mix/Risk Adjustment</b>   | Primary (Community) calls<br>Secondary (Transfer) calls                           |
| <b>Exclusion Criteria</b>         | Non-Obstetric patients<br>Insufficient reporting data                             |
| <b>Measure Calculation</b>        | Numerator/Denominator X 100 = %                                                   |
| <b>Numerical Reporting Format</b> | Percentage (%)                                                                    |
| <b>Graphical Reporting Format</b> | Run chart (min 10 data points)<br>SPC chart (min 20 data points)                  |
| <b>Reported Indicator</b>         | % Obstetric patients with postpartum haemorrhage who were administered TXA        |
| <b>Data Source</b>                | Patient Report Form                                                               |
| <b>Suggested Reporting Period</b> | Monthly<br>Quarterly<br>Annually                                                  |
| <b>Recommended Review Period</b>  | Three years                                                                       |

### **C-Ob-P-3 Obstetric patients with a provisional diagnosis of Eclampsia or Pre-eclampsia who were administered Mag sulphate**

| <b>Measure Code</b>               | <b>C-Ob-P-3</b>                                                                                                    |
|-----------------------------------|--------------------------------------------------------------------------------------------------------------------|
| <b>Definition</b>                 | Obstetric patients with a provisional diagnosis of Eclampsia or Pre-eclampsia who were administered Mag sulphate   |
| <b>Category</b>                   | Clinical                                                                                                           |
| <b>Subcategory</b>                | Obstetric                                                                                                          |
| <b>Measure Type</b>               | Process                                                                                                            |
| <b>Target Population</b>          | Adult patients<br>Medical patients                                                                                 |
| <b>Unit of Analysis</b>           | Clinician<br>Shift<br>Base<br>Service                                                                              |
| <b>Denominator Statement</b>      | Total number of Obstetric patients with a provisional diagnosis of Eclampsia or Pre-eclampsia                      |
| <b>Case Mix/Risk Adjustment</b>   | Primary (Community) calls<br>Secondary (Transfer) calls                                                            |
| <b>Exclusion Criteria</b>         | Non-Obstetric patients<br>Insufficient reporting data                                                              |
| <b>Measure Calculation</b>        | Numerator/Denominator X 100 = %                                                                                    |
| <b>Numerical Reporting Format</b> | Percentage (%)                                                                                                     |
| <b>Graphical Reporting Format</b> | Run chart (min 10 data points)<br>SPC chart (min 20 data points)                                                   |
| <b>Reported Indicator</b>         | % Obstetric patients with a provisional diagnosis of Eclampsia or Pre-eclampsia who were administered Mag sulphate |
| <b>Data Source</b>                | Patient Report Form                                                                                                |
| <b>Suggested Reporting Period</b> | Monthly<br>Quarterly<br>Annually                                                                                   |
| <b>Recommended Review Period</b>  | Three years                                                                                                        |

### C-Ob-P-3 Obstetric patients who deliver during EMS care

| Measure Code                      | C-Ob-P-3                                                         |
|-----------------------------------|------------------------------------------------------------------|
| <b>Definition</b>                 | Obstetric patients who deliver during EMS care                   |
| <b>Category</b>                   | Clinical                                                         |
| <b>Subcategory</b>                | Obstetric                                                        |
| <b>Measure Type</b>               | Process                                                          |
| <b>Target Population</b>          | Adult patients<br>Medical patients                               |
| <b>Unit of Analysis</b>           | Shift<br>Base<br>Service                                         |
| <b>Denominator Statement</b>      | Total number of Obstetric patients transported by EMS            |
| <b>Case Mix/Risk Adjustment</b>   | Primary (Community) calls<br>Secondary (Transfer) calls          |
| <b>Exclusion Criteria</b>         | Non-Obstetric patients<br>Insufficient reporting data            |
| <b>Measure Calculation</b>        | Numerator/Denominator X 100 = %                                  |
| <b>Numerical Reporting Format</b> | Percentage (%)                                                   |
| <b>Graphical Reporting Format</b> | Run chart (min 10 data points)<br>SPC chart (min 20 data points) |
| <b>Reported Indicator</b>         | % Obstetric patients who deliver during EMS care                 |
| <b>Data Source</b>                | Patient Report Form                                              |
| <b>Suggested Reporting Period</b> | Monthly<br>Quarterly<br>Annually                                 |
| <b>Recommended Review Period</b>  | Three years                                                      |

## Section 1: Clinical Category

### Part 11: Out of Hospital Cardiac Arrest

- C-Ca-P-1 Patients with a provisional diagnosis of OHCA with a witnessed collapse documented
- C-Ca-P-2 Patients with a provisional diagnosis of OHCA who received documented bystander CPR
- C-Ca-P-3 Patients with a provisional diagnosis of OHCA who received documented telephonic CPR advice
- C-Ca-P-4 Patients with a provisional diagnosis of OHCA with VF/VT as first presenting rhythm on arrival of EMS
- C-Ca-P-5 Patients with a provisional diagnosis of OHCA with Asystole/PEA as first presenting rhythm on arrival of EMS
- C-Ca-P-6 Patients with a provisional diagnosis of OHCA intubated with an alternative airway device
- C-Ca-P-7 Patients with a provisional diagnosis of OHCA for whom resuscitation was cancelled prior to arrival at hospital
- C-Ca-P-8 Patients with a provisional diagnosis of OHCA who were transported to hospital (incl. ROSC and Non-ROSC patients)
- C-Ca-P-9 Patients with a provisional diagnosis of OHCA with ROSC at hospital handover
- C-Ca-P-10 Patients with a provisional diagnosis of OHCA with VF/VT at hospital handover
- C-Ca-P-11 Patients with a provisional diagnosis of OHCA with Asystole/PEA at hospital handover
- C-Ca-P-12 Patients with a provisional diagnosis of OHCA with survival to Emergency Centre discharge
- C-Ca-O-1 Patients with a provisional diagnosis of OHCA with survival to hospital discharge

## C-Ca-P-1 Patients with a provisional diagnosis of OHCA with a witnessed collapse documented

| Measure Code                      | C-Ca-P-1                                                                                           |
|-----------------------------------|----------------------------------------------------------------------------------------------------|
| <b>Definition</b>                 | Patients with a provisional diagnosis of OHCA with a witnessed collapse documented                 |
| <b>Category</b>                   | Clinical                                                                                           |
| <b>Subcategory</b>                | OHCA                                                                                               |
| <b>Measure Type</b>               | Process                                                                                            |
| <b>Target Population</b>          | Adult patients<br>Paediatric patients<br>Medical patients<br>Trauma patients                       |
| <b>Unit of Analysis</b>           | Base<br>Service                                                                                    |
| <b>Numerator Statement</b>        | Total number of patients with a provisional diagnosis of OHCA with a witnessed collapse documented |
| <b>Denominator Statement</b>      | Total number of patients with a provisional diagnosis of OHCA recorded                             |
| <b>Case Mix/Risk Adjustment</b>   | Adult patients<br>Paediatric patients<br>Medical patients<br>Trauma patients                       |
| <b>Exclusion Criteria</b>         | Secondary (Transfer) calls<br>Insufficient reporting data                                          |
| <b>Measure Calculation</b>        | Numerator/Denominator X 100 = %                                                                    |
| <b>Numerical Reporting Format</b> | Percentage (%)                                                                                     |
| <b>Graphical Reporting Format</b> | Run chart (min 10 data points)<br>SPC chart (min 20 data points)                                   |
| <b>Reported Indicator</b>         | % Patients with a provisional diagnosis of OHCA with a witnessed collapse documented               |
| <b>Data Source</b>                | Patient Report Form<br>OHCA Registry                                                               |
| <b>Suggested Reporting Period</b> | Monthly<br>Quarterly<br>Annually                                                                   |
| <b>Recommended Review Period</b>  | Three years                                                                                        |

## C-Ca-P-2 Patients with a provisional diagnosis of OHCA who received documented bystander CPR

| Measure Code                      | C-Ca-P-2                                                                                            |
|-----------------------------------|-----------------------------------------------------------------------------------------------------|
| <b>Definition</b>                 | Patients with a provisional diagnosis of OHCA who received documented bystander CPR                 |
| <b>Category</b>                   | Clinical                                                                                            |
| <b>Subcategory</b>                | OHCA                                                                                                |
| <b>Measure Type</b>               | Process                                                                                             |
| <b>Target Population</b>          | Adult patients<br>Paediatric patients<br>Medical patients<br>Trauma patients                        |
| <b>Unit of Analysis</b>           | Service                                                                                             |
| <b>Numerator Statement</b>        | Total number of patients with a provisional diagnosis of OHCA who received documented bystander CPR |
| <b>Denominator Statement</b>      | Total number of patients with a provisional diagnosis of OHCA recorded                              |
| <b>Case Mix/Risk Adjustment</b>   | Adult patients<br>Paediatric patients<br>Medical patients<br>Trauma patients                        |
| <b>Exclusion Criteria</b>         | Secondary (Transfer) calls<br>Insufficient reporting data                                           |
| <b>Measure Calculation</b>        | Numerator/Denominator X 100 = %                                                                     |
| <b>Numerical Reporting Format</b> | Percentage (%)                                                                                      |
| <b>Graphical Reporting Format</b> | Run chart (min 10 data points)<br>SPC chart (min 20 data points)                                    |
| <b>Reported Indicator</b>         | % Patients with a provisional diagnosis of OHCA who received documented bystander CPR               |
| <b>Data Source</b>                | Patient Report Form<br>OHCA Registry                                                                |
| <b>Suggested Reporting Period</b> | Monthly<br>Quarterly<br>Annually                                                                    |
| <b>Recommended Review Period</b>  | Three years                                                                                         |

### C-Ca-P-3 Patients with a provisional diagnosis of OHCA who received documented telephonic CPR advice

| Measure Code                      | C-Ca-P-3                                                                                                    |
|-----------------------------------|-------------------------------------------------------------------------------------------------------------|
| <b>Definition</b>                 | Patients with a provisional diagnosis of OHCA who received documented telephonic CPR advice                 |
| <b>Category</b>                   | Clinical                                                                                                    |
| <b>Subcategory</b>                | OHCA                                                                                                        |
| <b>Measure Type</b>               | Process                                                                                                     |
| <b>Target Population</b>          | Adult patients<br>Paediatric patients<br>Medical patients<br>Trauma patients                                |
| <b>Unit of Analysis</b>           | Call Centre staff<br>Shift<br>Service                                                                       |
| <b>Numerator Statement</b>        | Total number of patients with a provisional diagnosis of OHCA who received documented telephonic CPR advice |
| <b>Denominator Statement</b>      | Total number of patients with a provisional diagnosis of OHCA recorded                                      |
| <b>Case Mix/Risk Adjustment</b>   | Adult patients<br>Paediatric patients<br>Medical patients<br>Trauma patients                                |
| <b>Exclusion Criteria</b>         | Secondary (Transfer) calls<br>Insufficient reporting data                                                   |
| <b>Measure Calculation</b>        | Numerator/Denominator X 100 = %                                                                             |
| <b>Numerical Reporting Format</b> | Percentage (%)                                                                                              |
| <b>Graphical Reporting Format</b> | Run chart (min 10 data points)<br>SPC chart (min 20 data points)                                            |
| <b>Reported Indicator</b>         | % Patients with a provisional diagnosis of OHCA who received documented telephonic CPR advice               |
| <b>Data Source</b>                | Patient Report Form<br>OHCA Registry                                                                        |
| <b>Suggested Reporting Period</b> | Monthly<br>Quarterly<br>Annually                                                                            |
| <b>Recommended Review Period</b>  | Three years                                                                                                 |

## C-Ca-P-4 Patients with a provisional diagnosis of OHCA with VF/VT as first presenting rhythm on arrival of EMS

| Measure Code                      | C-Ca-P-4                                                                                                              |
|-----------------------------------|-----------------------------------------------------------------------------------------------------------------------|
| <b>Definition</b>                 | Patients with a provisional diagnosis of OHCA with VF/VT as first presenting rhythm on arrival of EMS                 |
| <b>Category</b>                   | Clinical                                                                                                              |
| <b>Subcategory</b>                | OHCA                                                                                                                  |
| <b>Measure Type</b>               | Process                                                                                                               |
| <b>Target Population</b>          | Adult patients<br>Paediatric patients<br>Medical patients<br>Trauma patients                                          |
| <b>Unit of Analysis</b>           | Clinician<br>Shift<br>Base<br>Service                                                                                 |
| <b>Numerator Statement</b>        | Total number of patients with a provisional diagnosis of OHCA with VF/VT as first presenting rhythm on arrival of EMS |
| <b>Denominator Statement</b>      | Total number of patients with a provisional diagnosis of OHCA recorded                                                |
| <b>Case Mix/Risk Adjustment</b>   | Adult patients<br>Paediatric patients<br>Medical patients<br>Trauma patients                                          |
| <b>Exclusion Criteria</b>         | Secondary (Transfer) calls<br>Insufficient reporting data                                                             |
| <b>Measure Calculation</b>        | Numerator/Denominator X 100 = %                                                                                       |
| <b>Numerical Reporting Format</b> | Percentage (%)                                                                                                        |
| <b>Graphical Reporting Format</b> | Run chart (min 10 data points)<br>SPC chart (min 20 data points)                                                      |
| <b>Reported Indicator</b>         | % Patients with a provisional diagnosis of OHCA with VF/VT as first presenting rhythm on arrival of EMS               |
| <b>Data Source</b>                | Patient Report Form<br>OHCA Registry                                                                                  |
| <b>Suggested Reporting Period</b> | Monthly<br>Quarterly<br>Annually                                                                                      |
| <b>Recommended Review Period</b>  | Three years                                                                                                           |



## C-Ca-P-5 Patients with a provisional diagnosis of OHCA with Asystole/PEA as first presenting rhythm on arrival of EMS

| Measure Code                      | C-Ca-P-5                                                                                                                     |
|-----------------------------------|------------------------------------------------------------------------------------------------------------------------------|
| <b>Definition</b>                 | Patients with a provisional diagnosis of OHCA with Asystole/PEA as first presenting rhythm on arrival of EMS                 |
| <b>Category</b>                   | Clinical                                                                                                                     |
| <b>Subcategory</b>                | OHCA                                                                                                                         |
| <b>Measure Type</b>               | Process                                                                                                                      |
| <b>Target Population</b>          | Adult patients<br>Paediatric patients<br>Medical patients<br>Trauma patients                                                 |
| <b>Unit of Analysis</b>           | Clinician<br>Shift<br>Base<br>Service                                                                                        |
| <b>Numerator Statement</b>        | Total number of patients with a provisional diagnosis of OHCA with Asystole/PEA as first presenting rhythm on arrival of EMS |
| <b>Denominator Statement</b>      | Total number of patients with a provisional diagnosis of OHCA recorded                                                       |
| <b>Case Mix/Risk Adjustment</b>   | Adult patients<br>Paediatric patients<br>Medical patients<br>Trauma patients                                                 |
| <b>Exclusion Criteria</b>         | Secondary (Transfer) calls<br>Insufficient reporting data                                                                    |
| <b>Measure Calculation</b>        | Numerator/Denominator X 100 = %                                                                                              |
| <b>Numerical Reporting Format</b> | Percentage (%)                                                                                                               |
| <b>Graphical Reporting Format</b> | Run chart (min 10 data points)<br>SPC chart (min 20 data points)                                                             |
| <b>Reported Indicator</b>         | % Patients with a provisional diagnosis of OHCA with Asystole/PEA as first presenting rhythm on arrival of EMS               |
| <b>Data Source</b>                | Patient Report Form<br>OHCA Registry                                                                                         |
| <b>Suggested Reporting Period</b> | Monthly<br>Quarterly<br>Annually                                                                                             |
| <b>Recommended Review Period</b>  | Three years                                                                                                                  |

## C-Ca-P-6 Patients with a provisional diagnosis of OHCA intubated with an alternative airway device

| Measure Code                      | C-Ca-P-6                                                                                                  |
|-----------------------------------|-----------------------------------------------------------------------------------------------------------|
| <b>Definition</b>                 | Patients with a provisional diagnosis of OHCA intubated with an alternative airway device                 |
| <b>Category</b>                   | Clinical                                                                                                  |
| <b>Subcategory</b>                | OHCA                                                                                                      |
| <b>Measure Type</b>               | Process                                                                                                   |
| <b>Target Population</b>          | Adult patients<br>Paediatric patients<br>Medical patients<br>Trauma patients                              |
| <b>Unit of Analysis</b>           | Clinician<br>Shift<br>Base<br>Service                                                                     |
| <b>Numerator Statement</b>        | Total number of patients with a provisional diagnosis of OHCA intubated with an alternative airway device |
| <b>Denominator Statement</b>      | Total number of patients with a provisional diagnosis of OHCA recorded                                    |
| <b>Case Mix/Risk Adjustment</b>   | Adult patients<br>Paediatric patients<br>Medical patients<br>Trauma patients                              |
| <b>Exclusion Criteria</b>         | Secondary (Transfer) calls<br>Insufficient reporting data                                                 |
| <b>Measure Calculation</b>        | Numerator/Denominator X 100 = %                                                                           |
| <b>Numerical Reporting Format</b> | Percentage (%)                                                                                            |
| <b>Graphical Reporting Format</b> | Run chart (min 10 data points)<br>SPC chart (min 20 data points)                                          |
| <b>Reported Indicator</b>         | % Patients with a provisional diagnosis of OHCA intubated with an alternative airway device               |
| <b>Data Source</b>                | Patient Report Form<br>OHCA Registry                                                                      |
| <b>Suggested Reporting Period</b> | Monthly<br>Quarterly<br>Annually                                                                          |
| <b>Recommended Review Period</b>  | Three years                                                                                               |

## C-Ca-P-7 Patients with a provisional diagnosis of OHCA for whom resuscitation was cancelled prior to arrival at hospital

| Measure Code                      | C-Ca-P-7                                                                                                                        |
|-----------------------------------|---------------------------------------------------------------------------------------------------------------------------------|
| <b>Definition</b>                 | Patients with a provisional diagnosis of OHCA for whom resuscitation was cancelled prior to arrival at hospital                 |
| <b>Category</b>                   | Clinical                                                                                                                        |
| <b>Subcategory</b>                | OHCA                                                                                                                            |
| <b>Measure Type</b>               | Process                                                                                                                         |
| <b>Target Population</b>          | Adult patients<br>Paediatric patients<br>Medical patients<br>Trauma patients                                                    |
| <b>Unit of Analysis</b>           | Clinician<br>Shift<br>Base<br>Service                                                                                           |
| <b>Numerator Statement</b>        | Total number of patients with a provisional diagnosis of OHCA for whom resuscitation was cancelled prior to arrival at hospital |
| <b>Denominator Statement</b>      | Total number of patients with a provisional diagnosis of OHCA recorded                                                          |
| <b>Case Mix/Risk Adjustment</b>   | Adult patients<br>Paediatric patients<br>Medical patients<br>Trauma patients                                                    |
| <b>Exclusion Criteria</b>         | Secondary (Transfer) calls<br>Insufficient reporting data                                                                       |
| <b>Measure Calculation</b>        | Numerator/Denominator X 100 = %                                                                                                 |
| <b>Numerical Reporting Format</b> | Percentage (%)                                                                                                                  |
| <b>Graphical Reporting Format</b> | Run chart (min 10 data points)<br>SPC chart (min 20 data points)                                                                |
| <b>Reported Indicator</b>         | % Patients with a provisional diagnosis of OHCA for whom resuscitation was cancelled prior to arrival at hospital               |
| <b>Data Source</b>                | Patient Report Form<br>OHCA Registry                                                                                            |
| <b>Suggested Reporting Period</b> | Monthly<br>Quarterly<br>Annually                                                                                                |
| <b>Recommended Review Period</b>  | Three years                                                                                                                     |

## C-Ca-P-8 Patients with a provisional diagnosis of OHCA who were transported to hospital

| Measure Code                      | C-Ca-P-8                                                                                                            |
|-----------------------------------|---------------------------------------------------------------------------------------------------------------------|
| <b>Definition</b>                 | Patients with a provisional diagnosis of OHCA who were transported to hospital                                      |
| <b>Category</b>                   | Clinical                                                                                                            |
| <b>Subcategory</b>                | OHCA                                                                                                                |
| <b>Measure Type</b>               | Process                                                                                                             |
| <b>Target Population</b>          | Adult patients<br>Paediatric patients<br>Medical patients<br>Trauma patients                                        |
| <b>Unit of Analysis</b>           | Shift<br>Base<br>Service                                                                                            |
| <b>Numerator Statement</b>        | Total number of patients with a provisional diagnosis of OHCA who were transported to hospital                      |
| <b>Denominator Statement</b>      | Total number of patients with a provisional diagnosis of OHCA recorded                                              |
| <b>Case Mix/Risk Adjustment</b>   | Adult patients<br>Paediatric patients<br>Medical patients<br>Trauma patients                                        |
| <b>Exclusion Criteria</b>         | Secondary (Transfer) calls<br>Insufficient reporting data                                                           |
| <b>Measure Calculation</b>        | Numerator/Denominator X 100 = %                                                                                     |
| <b>Numerical Reporting Format</b> | Percentage (%)                                                                                                      |
| <b>Graphical Reporting Format</b> | Run chart (min 10 data points)<br>SPC chart (min 20 data points)                                                    |
| <b>Reported Indicator</b>         | % Patients with a provisional diagnosis of OHCA who were transported to hospital (incl. ROSC and Non-ROSC patients) |
| <b>Data Source</b>                | Patient Report Form<br>OHCA Registry                                                                                |
| <b>Suggested Reporting Period</b> | Monthly<br>Quarterly<br>Annually                                                                                    |
| <b>Recommended Review Period</b>  | Three years                                                                                                         |

## C-Ca-P-9 Patients with a provisional diagnosis of OHCA with ROSC at hospital handover

| Measure Code                      | C-Ca-P-9                                                                                     |
|-----------------------------------|----------------------------------------------------------------------------------------------|
| <b>Definition</b>                 | Patients with a provisional diagnosis of OHCA with ROSC at hospital handover                 |
| <b>Category</b>                   | Clinical                                                                                     |
| <b>Subcategory</b>                | OHCA                                                                                         |
| <b>Measure Type</b>               | Process                                                                                      |
| <b>Target Population</b>          | Adult patients<br>Paediatric patients<br>Medical patients<br>Trauma patients                 |
| <b>Unit of Analysis</b>           | Clinician<br>Shift<br>Base<br>Service                                                        |
| <b>Numerator Statement</b>        | Total number of patients with a provisional diagnosis of OHCA with ROSC at hospital handover |
| <b>Denominator Statement</b>      | Total number of patients with a provisional diagnosis of OHCA recorded                       |
| <b>Case Mix/Risk Adjustment</b>   | Adult patients<br>Paediatric patients<br>Medical patients<br>Trauma patients                 |
| <b>Exclusion Criteria</b>         | Secondary (Transfer) calls<br>Insufficient reporting data                                    |
| <b>Measure Calculation</b>        | Numerator/Denominator X 100 = %                                                              |
| <b>Numerical Reporting Format</b> | Percentage (%)                                                                               |
| <b>Graphical Reporting Format</b> | Run chart (min 10 data points)<br>SPC chart (min 20 data points)                             |
| <b>Reported Indicator</b>         | % Patients with a provisional diagnosis of OHCA with ROSC at hospital handover               |
| <b>Data Source</b>                | Patient Report Form<br>OHCA Registry                                                         |
| <b>Suggested Reporting Period</b> | Monthly<br>Quarterly<br>Annually                                                             |
| <b>Recommended Review Period</b>  | Three years                                                                                  |

## C-Ca-P-10 Patients with a provisional diagnosis of OHCA with VF/VT at hospital handover

| Measure Code                      | C-Ca-P-10                                                                                     |
|-----------------------------------|-----------------------------------------------------------------------------------------------|
| <b>Definition</b>                 | Patients with a provisional diagnosis of OHCA with VF/VT at hospital handover                 |
| <b>Category</b>                   | Clinical                                                                                      |
| <b>Subcategory</b>                | OHCA                                                                                          |
| <b>Measure Type</b>               | Process                                                                                       |
| <b>Target Population</b>          | Adult patients<br>Paediatric patients<br>Medical patients<br>Trauma patients                  |
| <b>Unit of Analysis</b>           | Clinician<br>Shift<br>Base<br>Service                                                         |
| <b>Numerator Statement</b>        | Total number of patients with a provisional diagnosis of OHCA with VF/VT at hospital handover |
| <b>Denominator Statement</b>      | Total number of patients with a provisional diagnosis of OHCA recorded                        |
| <b>Case Mix/Risk Adjustment</b>   | Adult patients<br>Paediatric patients<br>Medical patients<br>Trauma patients                  |
| <b>Exclusion Criteria</b>         | Secondary (Transfer) calls<br>Insufficient reporting data                                     |
| <b>Measure Calculation</b>        | Numerator/Denominator X 100 = %                                                               |
| <b>Numerical Reporting Format</b> | Percentage (%)                                                                                |
| <b>Graphical Reporting Format</b> | Run chart (min 10 data points)<br>SPC chart (min 20 data points)                              |
| <b>Reported Indicator</b>         | % Patients with a provisional diagnosis of OHCA with VF/VT at hospital handover               |
| <b>Data Source</b>                | Patient Report Form<br>OHCA Registry                                                          |
| <b>Suggested Reporting Period</b> | Monthly<br>Quarterly<br>Annually                                                              |
| <b>Recommended Review Period</b>  | Three years                                                                                   |

## C-Ca-P-11 Patients with a provisional diagnosis of OHCA with Asystole/PEA at hospital handover

| Measure Code                      | C-Ca-P-11                                                                                            |
|-----------------------------------|------------------------------------------------------------------------------------------------------|
| <b>Definition</b>                 | Patients with a provisional diagnosis of OHCA with Asystole/PEA at hospital handover                 |
| <b>Category</b>                   | Clinical                                                                                             |
| <b>Subcategory</b>                | OHCA                                                                                                 |
| <b>Measure Type</b>               | Process                                                                                              |
| <b>Target Population</b>          | Adult patients<br>Paediatric patients<br>Medical patients<br>Trauma patients                         |
| <b>Unit of Analysis</b>           | Clinician<br>Shift<br>Base<br>Service                                                                |
| <b>Numerator Statement</b>        | Total number of patients with a provisional diagnosis of OHCA with Asystole/PEA at hospital handover |
| <b>Denominator Statement</b>      | Total number of patients with a provisional diagnosis of OHCA recorded                               |
| <b>Case Mix/Risk Adjustment</b>   | Adult patients<br>Paediatric patients<br>Medical patients<br>Trauma patients                         |
| <b>Exclusion Criteria</b>         | Secondary (Transfer) calls<br>Insufficient reporting data                                            |
| <b>Measure Calculation</b>        | Numerator/Denominator X 100 = %                                                                      |
| <b>Numerical Reporting Format</b> | Percentage (%)                                                                                       |
| <b>Graphical Reporting Format</b> | Run chart (min 10 data points)<br>SPC chart (min 20 data points)                                     |
| <b>Reported Indicator</b>         | % Patients with a provisional diagnosis of OHCA with Asystole/PEA at hospital handover               |
| <b>Data Source</b>                | Patient Report Form<br>OHCA Registry                                                                 |
| <b>Suggested Reporting Period</b> | Monthly<br>Quarterly<br>Annually                                                                     |
| <b>Recommended Review Period</b>  | Three years                                                                                          |

## C-Ca-P-12 Patients with a provisional diagnosis of OHCA with survival to Emergency Centre discharge

| Measure Code                      | C-Ca-P-12                                                                                                 |
|-----------------------------------|-----------------------------------------------------------------------------------------------------------|
| <b>Definition</b>                 | Patients with a provisional diagnosis of OHCA with survival to Emergency Centre discharge                 |
| <b>Category</b>                   | Clinical                                                                                                  |
| <b>Subcategory</b>                | OHCA                                                                                                      |
| <b>Measure Type</b>               | Process                                                                                                   |
| <b>Target Population</b>          | Adult patients<br>Paediatric patients<br>Medical patients<br>Trauma patients                              |
| <b>Unit of Analysis</b>           | Clinician<br>Shift<br>Base<br>Service                                                                     |
| <b>Numerator Statement</b>        | Total number of patients with a provisional diagnosis of OHCA with survival to Emergency Centre discharge |
| <b>Denominator Statement</b>      | Total number of patients with a provisional diagnosis of OHCA recorded                                    |
| <b>Case Mix/Risk Adjustment</b>   | Adult patients<br>Paediatric patients<br>Medical patients<br>Trauma patients                              |
| <b>Exclusion Criteria</b>         | Secondary (Transfer) calls<br>Insufficient reporting data                                                 |
| <b>Measure Calculation</b>        | Numerator/Denominator X 100 = %                                                                           |
| <b>Numerical Reporting Format</b> | Percentage (%)                                                                                            |
| <b>Graphical Reporting Format</b> | Run chart (min 10 data points)<br>SPC chart (min 20 data points)                                          |
| <b>Reported Indicator</b>         | % Patients with a provisional diagnosis of OHCA with survival to EC discharge                             |
| <b>Data Source</b>                | Patient Report Form<br>OHCA Registry<br>hospital patient data                                             |
| <b>Suggested Reporting Period</b> | Monthly<br>Quarterly<br>Annually                                                                          |
| <b>Recommended Review Period</b>  | Three years                                                                                               |



## C-Ca-O-1 Patients with a provisional diagnosis of OHCA with survival to hospital discharge

| Measure Code                      | C-Ca-O-1                                                                                          |
|-----------------------------------|---------------------------------------------------------------------------------------------------|
| <b>Definition</b>                 | Patients with a provisional diagnosis of OHCA with survival to hospital discharge                 |
| <b>Category</b>                   | Clinical                                                                                          |
| <b>Subcategory</b>                | OHCA                                                                                              |
| <b>Measure Type</b>               | Outcome                                                                                           |
| <b>Target Population</b>          | Adult patients<br>Paediatric patients<br>Medical patients<br>Trauma patients                      |
| <b>Unit of Analysis</b>           | Clinician<br>Shift<br>Base<br>Service                                                             |
| <b>Numerator Statement</b>        | Total number of patients with a provisional diagnosis of OHCA with survival to hospital discharge |
| <b>Denominator Statement</b>      | Total number of patients with a provisional diagnosis of OHCA recorded                            |
| <b>Case Mix/Risk Adjustment</b>   | Adult patients<br>Paediatric patients<br>Medical patients<br>Trauma patients                      |
| <b>Exclusion Criteria</b>         | Secondary (Transfer) calls<br>Insufficient reporting data                                         |
| <b>Measure Calculation</b>        | Numerator/Denominator X 100 = %                                                                   |
| <b>Numerical Reporting Format</b> | Percentage (%)                                                                                    |
| <b>Graphical Reporting Format</b> | Run chart (min 10 data points)<br>SPC chart (min 20 data points)                                  |
| <b>Reported Indicator</b>         | % Patients with a provisional diagnosis of OHCA with survival to hospital discharge               |
| <b>Data Source</b>                | Patient Report Form<br>OHCA Registry<br>hospital patient data                                     |
| <b>Suggested Reporting Period</b> | Monthly<br>Quarterly<br>Annually                                                                  |
| <b>Recommended Review Period</b>  | Three years                                                                                       |

## **Section 1: Clinical Category**

### **Part 12: Pain Management**

- C-Pm-P-1 Patients with level of Pain measured via defined pain score
- C-Pm-P-2 Patients with a defined pain score threshold who were administered analgesia
- C-Pm-P-3 Patients with level of pain measured via defined pain score following analgesia administration

## C-Pm-P-1 Patients with level of pain measured via defined pain score

| Measure Code                      | C-Pm-P-1                                                                                                                                                    |
|-----------------------------------|-------------------------------------------------------------------------------------------------------------------------------------------------------------|
| <b>Definition</b>                 | Patients with level of pain measured via defined pain score                                                                                                 |
| <b>Category</b>                   | Clinical                                                                                                                                                    |
| <b>Subcategory</b>                | Pain Mx                                                                                                                                                     |
| <b>Measure Type</b>               | Process                                                                                                                                                     |
| <b>Target Population</b>          | Adult patients<br>Paediatric patients<br>Medical patients<br>Trauma patients                                                                                |
| <b>Unit of Analysis</b>           | Clinician<br>Shift<br>Base<br>Service                                                                                                                       |
| <b>Numerator Statement</b>        | Total number of patients with level of pain measured via defined pain score                                                                                 |
| <b>Denominator Statement</b>      | Total number of patients transported by EMS                                                                                                                 |
| <b>Case Mix/Risk Adjustment</b>   | Adult patients<br>Paediatric patients<br>Trauma patients<br>Primary (Community) calls<br>Secondary (Transfer) calls<br>ACS/STEMI patients<br>Burns patients |
| <b>Exclusion Criteria</b>         | Patients unable to convey level of pain<br>Insufficient reporting data                                                                                      |
| <b>Measure Calculation</b>        | Numerator/Denominator X 100 = %                                                                                                                             |
| <b>Numerical Reporting Format</b> | Percentage (%)                                                                                                                                              |
| <b>Graphical Reporting Format</b> | Run chart (min 10 data points)<br>SPC chart (min 20 data points)                                                                                            |
| <b>Reported Indicator</b>         | % Patients with level of Pain measured via defined pain score                                                                                               |
| <b>Data Source</b>                | Patient Report Form                                                                                                                                         |
| <b>Suggested Reporting Period</b> | Monthly<br>Quarterly<br>Annually                                                                                                                            |
| <b>Recommended Review Period</b>  | Three years                                                                                                                                                 |

## C-Pm-P-2 Patients with a defined pain score threshold who were administered analgesia

| Measure Code                      | C-Pm-P-2                                                                                                                                                    |
|-----------------------------------|-------------------------------------------------------------------------------------------------------------------------------------------------------------|
| <b>Definition</b>                 | Patients with a defined pain score threshold who were administered analgesia                                                                                |
| <b>Category</b>                   | Clinical                                                                                                                                                    |
| <b>Subcategory</b>                | Pain Mx                                                                                                                                                     |
| <b>Measure Type</b>               | Process                                                                                                                                                     |
| <b>Target Population</b>          | Adult patients<br>Paediatric patients<br>Medical patients<br>Trauma patients                                                                                |
| <b>Unit of Analysis</b>           | Clinician<br>Shift<br>Base<br>Service                                                                                                                       |
| <b>Numerator Statement</b>        | Total number of patients with a defined pain score threshold who were administered analgesia                                                                |
| <b>Denominator Statement</b>      | Total number of patients with level of pain $\geq$ defined pain score threshold                                                                             |
| <b>Case Mix/Risk Adjustment</b>   | Adult patients<br>Paediatric patients<br>Trauma patients<br>Primary (Community) calls<br>Secondary (Transfer) calls<br>ACS/STEMI patients<br>Burns patients |
| <b>Exclusion Criteria</b>         | Patients unable to convey level of pain<br>Patients not administered analgesia<br>Insufficient reporting data                                               |
| <b>Measure Calculation</b>        | Numerator/Denominator X 100 = %                                                                                                                             |
| <b>Numerical Reporting Format</b> | Percentage (%)                                                                                                                                              |
| <b>Graphical Reporting Format</b> | Run chart (min 10 data points)<br>SPC chart (min 20 data points)                                                                                            |
| <b>Reported Indicator</b>         | % Patients with a defined pain score threshold who were administered analgesia                                                                              |
| <b>Data Source</b>                | Patient Report Form                                                                                                                                         |
| <b>Suggested Reporting Period</b> | Monthly<br>Quarterly<br>Annually                                                                                                                            |
| <b>Recommended Review Period</b>  | Three years                                                                                                                                                 |

### C-Pm-P-3 Patients with level of pain measured via defined pain score following analgesia administration

| Measure Code                      | C-Pm-P-3                                                                                                                                                    |
|-----------------------------------|-------------------------------------------------------------------------------------------------------------------------------------------------------------|
| <b>Definition</b>                 | Patients with level of pain measured via defined pain score following analgesia administration                                                              |
| <b>Category</b>                   | Clinical                                                                                                                                                    |
| <b>Subcategory</b>                | Pain Mx                                                                                                                                                     |
| <b>Measure Type</b>               | Process                                                                                                                                                     |
| <b>Target Population</b>          | Adult patients<br>Paediatric patients<br>Medical patients<br>Trauma patients                                                                                |
| <b>Unit of Analysis</b>           | Clinician<br>Shift<br>Base<br>Service                                                                                                                       |
| <b>Numerator Statement</b>        | Total number of patients with level of pain measured via defined pain score following analgesia administration                                              |
| <b>Denominator Statement</b>      | Total number of patients who received analgesia by EMS personnel                                                                                            |
| <b>Case Mix/Risk Adjustment</b>   | Adult patients<br>Paediatric patients<br>Trauma patients<br>Primary (Community) calls<br>Secondary (Transfer) calls<br>ACS/STEMI patients<br>Burns patients |
| <b>Exclusion Criteria</b>         | Patients unable to convey level of pain<br>Patients not administered analgesia<br>Insufficient reporting data                                               |
| <b>Measure Calculation</b>        | Numerator/Denominator X 100 = %                                                                                                                             |
| <b>Numerical Reporting Format</b> | Percentage (%)                                                                                                                                              |
| <b>Graphical Reporting Format</b> | Run chart (min 10 data points)<br>SPC chart (min 20 data points)                                                                                            |
| <b>Reported Indicator</b>         | % Patients with level of pain measured via defined pain score following analgesia administration                                                            |
| <b>Data Source</b>                | Patient Report Form                                                                                                                                         |
| <b>Suggested Reporting Period</b> | Monthly<br>Quarterly<br>Annually                                                                                                                            |
| <b>Recommended Review Period</b>  | Three years                                                                                                                                                 |

## **Section 1: Clinical Category**

### **Part 13: Seizures**

- C-Se-P-1 Patients with a provisional diagnosis of Seizures with a blood glucose measured and recorded
- C-Se-P-2 Patients with a provisional diagnosis of Seizures who were administered a benzodiazepine for ongoing Seizures

## C-Se-P-1 Patients with a provisional diagnosis of Seizures with a blood glucose measured and recorded

| Measure Code                      | C-Se-P-1                                                                                                     |
|-----------------------------------|--------------------------------------------------------------------------------------------------------------|
| <b>Definition</b>                 | Patients with a provisional diagnosis of Seizures with a blood glucose measured and recorded                 |
| <b>Category</b>                   | Clinical                                                                                                     |
| <b>Subcategory</b>                | Seizures                                                                                                     |
| <b>Measure Type</b>               | Process                                                                                                      |
| <b>Target Population</b>          | Adult patients<br>Paediatric patients<br>Medical patients                                                    |
| <b>Unit of Analysis</b>           | Clinician<br>Shift<br>Base<br>Service                                                                        |
| <b>Numerator Statement</b>        | Total number of patients with a provisional diagnosis of Seizures with a blood glucose measured and recorded |
| <b>Denominator Statement</b>      | Total number of patients with a provisional diagnosis of Seizures                                            |
| <b>Case Mix/Risk Adjustment</b>   | Adult patients<br>Paediatric patients<br>Primary (Community) calls<br>Secondary (Transfer) calls             |
| <b>Exclusion Criteria</b>         | Insufficient reporting data                                                                                  |
| <b>Measure Calculation</b>        | Numerator/Denominator X 100 = %                                                                              |
| <b>Numerical Reporting Format</b> | Percentage (%)                                                                                               |
| <b>Graphical Reporting Format</b> | Run chart (min 10 data points)<br>SPC chart (min 20 data points)                                             |
| <b>Reported Indicator</b>         | % Patients with a provisional diagnosis of Seizures with a blood glucose measured and recorded               |
| <b>Data Source</b>                | Patient Report Form                                                                                          |
| <b>Suggested Reporting Period</b> | Monthly<br>Quarterly<br>Annually                                                                             |
| <b>Recommended Review Period</b>  | Three years                                                                                                  |

## C-Se-P-2 Patients with a provisional diagnosis of Seizures who were administered a benzodiazepine for ongoing Seizures

| Measure Code                      | C-Se-P-2                                                                                                                      |
|-----------------------------------|-------------------------------------------------------------------------------------------------------------------------------|
| <b>Definition</b>                 | Patients with a provisional diagnosis of Seizures who were administered a benzodiazepine for ongoing Seizures                 |
| <b>Category</b>                   | Clinical                                                                                                                      |
| <b>Subcategory</b>                | Seizures                                                                                                                      |
| <b>Measure Type</b>               | Process                                                                                                                       |
| <b>Target Population</b>          | Adult patients<br>Paediatric patients<br>Medical patients                                                                     |
| <b>Unit of Analysis</b>           | Clinician<br>Shift<br>Base<br>Service                                                                                         |
| <b>Numerator Statement</b>        | Total number of patients with a provisional diagnosis of Seizures who were administered a benzodiazepine for ongoing Seizures |
| <b>Denominator Statement</b>      | Total number of patients with a provisional diagnosis of Seizures                                                             |
| <b>Case Mix/Risk Adjustment</b>   | Adult patients<br>Paediatric patients<br>Primary (Community) calls<br>Secondary (Transfer) calls                              |
| <b>Exclusion Criteria</b>         | Insufficient reporting data                                                                                                   |
| <b>Measure Calculation</b>        | Numerator/Denominator X 100 = %                                                                                               |
| <b>Numerical Reporting Format</b> | Percentage (%)                                                                                                                |
| <b>Graphical Reporting Format</b> | Run chart (min 10 data points)<br>SPC chart (min 20 data points)                                                              |
| <b>Reported Indicator</b>         | % Patients with a provisional diagnosis of Seizures who were administered a benzodiazepine for ongoing Seizures               |
| <b>Data Source</b>                | Patient Report Form                                                                                                           |
| <b>Suggested Reporting Period</b> | Monthly<br>Quarterly<br>Annually                                                                                              |
| <b>Recommended Review Period</b>  | Three years                                                                                                                   |



## **Section 1: Clinical Category**

### **Part 14: Stroke/CVA/TIA**

- C-SCT-P-1 Patients with a provisional diagnosis of Stroke/CVA/TIA with a blood glucose measured and recorded
- C-SCT-P-2 Patients with a provisional diagnosis of Stroke/CVA/TIA with a Stroke screening assessment performed (e.g.: FAST)
- C-SCT-P-3 Patients with a provisional diagnosis of Stroke/CVA/TIA with serial blood pressure measurements recorded (X3)
- C-SCT-P-4 Patients with a provisional diagnosis of Stroke/CVA/TIA delivered to a specialist Stroke Centre
- C-SCT-P-5 Patients with a provisional diagnosis of Stroke/CVA/TIA with direct delivery to CT scan
- C-SCT-P-6 Patients who received/met all components of the defined Stroke/CVA/TIA composite bundle score

## C-SCT-P-1 Patients with a provisional diagnosis of Stroke/CVA/TIA with a blood glucose measured and recorded

| Measure Code                      | C-SCT-P-1                                                                                                          |
|-----------------------------------|--------------------------------------------------------------------------------------------------------------------|
| <b>Definition</b>                 | Patients with a provisional diagnosis of Stroke/CVA/TIA with a blood glucose measured and recorded                 |
| <b>Category</b>                   | Clinical                                                                                                           |
| <b>Subcategory</b>                | Stroke/CVA/TIA                                                                                                     |
| <b>Measure Type</b>               | Process                                                                                                            |
| <b>Target Population</b>          | Adult patients<br>Medical patients                                                                                 |
| <b>Unit of Analysis</b>           | Clinician<br>Shift<br>Base<br>Service                                                                              |
| <b>Numerator Statement</b>        | Total number of patients with a provisional diagnosis of Stroke/CVA/TIA with a blood glucose measured and recorded |
| <b>Denominator Statement</b>      | Total number of patients with a provisional diagnosis of Stroke/CVA/TIA                                            |
| <b>Case Mix/Risk Adjustment</b>   | Adult patients<br>Primary (Community) calls<br>Secondary (Transfer) calls                                          |
| <b>Exclusion Criteria</b>         | Paediatric patients<br>Insufficient reporting data                                                                 |
| <b>Measure Calculation</b>        | Numerator/Denominator X 100 = %                                                                                    |
| <b>Numerical Reporting Format</b> | Percentage (%)                                                                                                     |
| <b>Graphical Reporting Format</b> | Run chart (min 10 data points)<br>SPC chart (min 20 data points)                                                   |
| <b>Reported Indicator</b>         | % Patients with a provisional diagnosis of Stroke/CVA/TIA with a blood glucose measured and recorded               |
| <b>Data Source</b>                | Patient Report Form<br>Stroke Register                                                                             |
| <b>Suggested Reporting Period</b> | Monthly<br>Quarterly<br>Annually                                                                                   |
| <b>Recommended Review Period</b>  | Three years                                                                                                        |

## C-SCT-P-2 Patients with a provisional diagnosis of Stroke/CVA/TIA with a Stroke screening assessment performed (e.g.: FAST)

| Measure Code                      | C-SCT-P-2                                                                                                                         |
|-----------------------------------|-----------------------------------------------------------------------------------------------------------------------------------|
| <b>Definition</b>                 | Patients with a provisional diagnosis of Stroke/CVA/TIA with a Stroke screening assessment performed (e.g.: FAST)                 |
| <b>Category</b>                   | Clinical                                                                                                                          |
| <b>Subcategory</b>                | Stroke/CVA/TIA                                                                                                                    |
| <b>Measure Type</b>               | Process                                                                                                                           |
| <b>Target Population</b>          | Adult patients<br>Medical patients                                                                                                |
| <b>Unit of Analysis</b>           | Clinician<br>Shift<br>Base<br>Service                                                                                             |
| <b>Numerator Statement</b>        | Total number of patients with a provisional diagnosis of Stroke/CVA/TIA with a Stroke screening assessment performed (e.g.: FAST) |
| <b>Denominator Statement</b>      | Total number of patients with a provisional diagnosis of Stroke/CVA/TIA                                                           |
| <b>Case Mix/Risk Adjustment</b>   | Adult patients<br>Primary (Community) calls<br>Secondary (Transfer) calls                                                         |
| <b>Exclusion Criteria</b>         | Paediatric patients<br>Insufficient reporting data                                                                                |
| <b>Measure Calculation</b>        | Numerator/Denominator X 100 = %                                                                                                   |
| <b>Numerical Reporting Format</b> | Percentage (%)                                                                                                                    |
| <b>Graphical Reporting Format</b> | Run chart (min 10 data points)<br>SPC chart (min 20 data points)                                                                  |
| <b>Reported Indicator</b>         | % Patients with a provisional diagnosis of Stroke/CVA/TIA with a Stroke screening assessment performed (e.g.: FAST)               |
| <b>Data Source</b>                | Patient Report Form<br>Stroke Register                                                                                            |
| <b>Suggested Reporting Period</b> | Monthly<br>Quarterly<br>Annually                                                                                                  |
| <b>Recommended Review Period</b>  | Three years                                                                                                                       |

### C-SCT-P-3 Patients with a provisional diagnosis of Stroke/CVA/TIA with serial blood pressure measurements recorded (X3)

| Measure Code                      | C-SCT-P-3                                                                                                                     |
|-----------------------------------|-------------------------------------------------------------------------------------------------------------------------------|
| <b>Definition</b>                 | Patients with a provisional diagnosis of Stroke/CVA/TIA with serial blood pressure measurements recorded (X3)                 |
| <b>Category</b>                   | Clinical                                                                                                                      |
| <b>Subcategory</b>                | Stroke/CVA/TIA                                                                                                                |
| <b>Measure Type</b>               | Process                                                                                                                       |
| <b>Target Population</b>          | Adult patients<br>Medical patients                                                                                            |
| <b>Unit of Analysis</b>           | Clinician<br>Shift<br>Base<br>Service                                                                                         |
| <b>Numerator Statement</b>        | Total number of patients with a provisional diagnosis of Stroke/CVA/TIA with serial blood pressure measurements recorded (X3) |
| <b>Denominator Statement</b>      | Total number of patients with a provisional diagnosis of Stroke/CVA/TIA                                                       |
| <b>Case Mix/Risk Adjustment</b>   | Adult patients<br>Primary (Community) calls<br>Secondary (Transfer) calls                                                     |
| <b>Exclusion Criteria</b>         | Paediatric patients<br>Insufficient reporting data                                                                            |
| <b>Measure Calculation</b>        | Numerator/Denominator X 100 = %                                                                                               |
| <b>Numerical Reporting Format</b> | Percentage (%)                                                                                                                |
| <b>Graphical Reporting Format</b> | Run chart (min 10 data points)<br>SPC chart (min 20 data points)                                                              |
| <b>Reported Indicator</b>         | % Patients with a provisional diagnosis of Stroke/CVA/TIA with serial Blood pressure measurements recorded (X3)               |
| <b>Data Source</b>                | Patient Report Form<br>Stroke Register                                                                                        |
| <b>Suggested Reporting Period</b> | Monthly<br>Quarterly<br>Annually                                                                                              |
| <b>Recommended Review Period</b>  | Three years                                                                                                                   |

## C-SCT-P-4 Patients with a provisional diagnosis of Stroke/CVA/TIA delivered to a specialist Stroke Centre

| Measure Code                      | C-SCT-P-4                                                                                                                     |
|-----------------------------------|-------------------------------------------------------------------------------------------------------------------------------|
| <b>Definition</b>                 | Patients with a provisional diagnosis of Stroke/CVA/TIA delivered to a specialist Stroke Centre                               |
| <b>Category</b>                   | Clinical                                                                                                                      |
| <b>Measure Type</b>               | Outcome                                                                                                                       |
| <b>Target Population</b>          | Adult patients<br>Medical patients                                                                                            |
| <b>Unit of Analysis</b>           | Shift<br>Base<br>Service                                                                                                      |
| <b>Numerator Statement</b>        | Total number of patients with a provisional diagnosis of Stroke/CVA/TIA with serial blood pressure measurements recorded (X3) |
| <b>Denominator Statement</b>      | Total number of patients with a provisional diagnosis of Stroke/CVA/TIA                                                       |
| <b>Case Mix/Risk Adjustment</b>   | Adult patients<br>Primary (Community) calls<br>Secondary (Transfer) calls                                                     |
| <b>Exclusion Criteria</b>         | Paediatric patients<br>Insufficient reporting data                                                                            |
| <b>Measure Calculation</b>        | Numerator/Denominator X 100 = %                                                                                               |
| <b>Numerical Reporting Format</b> | Percentage (%)                                                                                                                |
| <b>Graphical Reporting Format</b> | Run chart (min 10 data points)<br>SPC chart (min 20 data points)                                                              |
| <b>Reported Indicator</b>         | % Patients with a provisional diagnosis of Stroke/CVA/TIA delivered to a specialist Stroke Centre                             |
| <b>Data Source</b>                | Patient Report Form<br>Stroke Register                                                                                        |
| <b>Suggested Reporting Period</b> | Monthly<br>Quarterly<br>Annually                                                                                              |
| <b>Recommended Review Period</b>  | Three years                                                                                                                   |

## C-SCT-P-5 Patients with a provisional diagnosis of Stroke/CVA/TIA with direct delivery to CT scan

| Measure Code                      | C-SCT-P-5                                                                                                                 |
|-----------------------------------|---------------------------------------------------------------------------------------------------------------------------|
| <b>Definition</b>                 | Patients with a provisional diagnosis of Stroke/CVA/TIA with direct delivery to CT scan                                   |
| <b>Category</b>                   | Clinical                                                                                                                  |
| <b>Subcategory</b>                | Stroke/CVA/TIA                                                                                                            |
| <b>Measure Type</b>               | Process                                                                                                                   |
| <b>Target Population</b>          | Adult patients<br>Medical patients                                                                                        |
| <b>Unit of Analysis</b>           | Shift<br>Base<br>Service                                                                                                  |
| <b>Numerator Statement</b>        | Total number of patients with a provisional diagnosis of Stroke/CVA/TIA with direct delivery to CT scan                   |
| <b>Denominator Statement</b>      | Total number of patients with a provisional diagnosis of Stroke/CVA/TIA                                                   |
| <b>Case Mix/Risk Adjustment</b>   | Adult patients<br>Primary (Community) calls<br>Secondary (Transfer) calls                                                 |
| <b>Exclusion Criteria</b>         | Paediatric patients<br>Patients delivered to receiving facility without CT scan facilities<br>Insufficient reporting data |
| <b>Measure Calculation</b>        | Numerator/Denominator X 100 = %                                                                                           |
| <b>Numerical Reporting Format</b> | Percentage (%)                                                                                                            |
| <b>Graphical Reporting Format</b> | Run chart (min 10 data points)<br>SPC chart (min 20 data points)                                                          |
| <b>Reported Indicator</b>         | % Patients with a provisional diagnosis of Stroke/CVA/TIA with direct delivery to CT scan                                 |
| <b>Data Source</b>                | Patient Report Form<br>Stroke Register                                                                                    |
| <b>Suggested Reporting Period</b> | Monthly<br>Quarterly<br>Annually                                                                                          |
| <b>Recommended Review Period</b>  | Three years                                                                                                               |

## C-SCT-P-6 Patients who received/met all components of the defined Stroke/CVA/TIA composite bundle score

| Measure Code                      | C-SCT-P-6                                                                                                     |
|-----------------------------------|---------------------------------------------------------------------------------------------------------------|
| <b>Definition</b>                 | Patients who received/met all components of the defined Stroke/CVA/TIA composite bundle score                 |
| <b>Category</b>                   | Clinical                                                                                                      |
| <b>Subcategory</b>                | Stroke/CVA/TIA                                                                                                |
| <b>Measure Type</b>               | Process                                                                                                       |
| <b>Target Population</b>          | Adult patients<br>Medical patients                                                                            |
| <b>Unit of Analysis</b>           | Clinician<br>Shift<br>Base<br>Service                                                                         |
| <b>Numerator Statement</b>        | Total number of patients who received/met all components of the defined Stroke/CVA/TIA composite bundle score |
| <b>Denominator Statement</b>      | Total number of patients with a provisional diagnosis of Stroke/CVA/TIA                                       |
| <b>Case Mix/Risk Adjustment</b>   | Adult patients<br>Primary (Community) calls<br>Secondary (Transfer) calls                                     |
| <b>Exclusion Criteria</b>         | Paediatric patients<br>Insufficient reporting data                                                            |
| <b>Measure Calculation</b>        | Numerator/Denominator X 100 = %                                                                               |
| <b>Numerical Reporting Format</b> | Percentage (%)                                                                                                |
| <b>Graphical Reporting Format</b> | Run chart (min 10 data points)<br>SPC chart (min 20 data points)                                              |
| <b>Reported Indicator</b>         | % Patients who received/met all components of the defined Stroke composite bundle score                       |
| <b>Data Source</b>                | Patient Report Form<br>Stroke Register                                                                        |
| <b>Suggested Reporting Period</b> | Monthly<br>Quarterly<br>Annually                                                                              |
| <b>Recommended Review Period</b>  | Three years                                                                                                   |

## Section 1: Clinical Category

### Part 15: Trauma

- C-Tr-P-1 Patients designated as a trauma case with entrapment on scene documented
- C-Tr-P-2 Patients designated as a trauma case with a BP < 90 mmHg
- C-Tr-P-3 Patients designated as a trauma case with partial/full amputation who had a tourniquet applied
- C-Tr-P-4 Patients designated as a trauma case with a femur fracture and traction splint use
- C-Tr-P-5 Patients designated as a trauma case with a BP < 90 mmHg who were administered TXA
- C-Tr-P-6 Patients designated as a trauma case with direct transportation to a specialist Trauma Centre



## C-Tr-P-1 Patients designated as a trauma case with entrapment on scene documented

| Measure Code                      | C-Tr-P-1                                                                                         |
|-----------------------------------|--------------------------------------------------------------------------------------------------|
| <b>Definition</b>                 | Patients designated as a trauma case with entrapment on scene documented                         |
| <b>Category</b>                   | Clinical                                                                                         |
| <b>Subcategory</b>                | Trauma                                                                                           |
| <b>Measure Type</b>               | Process                                                                                          |
| <b>Target Population</b>          | Adult patients<br>Paediatric patients<br>Trauma patients                                         |
| <b>Unit of Analysis</b>           | Shift<br>Base<br>Service                                                                         |
| <b>Numerator Statement</b>        | Total number of patients designated as a trauma case with entrapment on scene documented         |
| <b>Denominator Statement</b>      | Total number of patients designated as trauma                                                    |
| <b>Case Mix/Risk Adjustment</b>   | Adult patients<br>Paediatric patients<br>Primary (Community) calls<br>Secondary (Transfer) calls |
| <b>Exclusion Criteria</b>         | Medical patients (i.e.: Non-trauma patients)<br>Insufficient reporting data                      |
| <b>Measure Calculation</b>        | Numerator/Denominator X 100 = %                                                                  |
| <b>Numerical Reporting Format</b> | Percentage (%)                                                                                   |
| <b>Graphical Reporting Format</b> | Run chart (min 10 data points)<br>SPC chart (min 20 data points)                                 |
| <b>Reported Indicator</b>         | % Patients designated as a trauma case with entrapment on scene recorded                         |
| <b>Data Source</b>                | Patient Report Form<br>Trauma registry                                                           |
| <b>Suggested Reporting Period</b> | Monthly<br>Quarterly<br>Annually                                                                 |
| <b>Recommended Review Period</b>  | Three years                                                                                      |

## C-Tr-P-2 Patients designated as a trauma case with a BP < 90 mmHg

| Measure Code                      | C-Tr-P-2                                                                                         |
|-----------------------------------|--------------------------------------------------------------------------------------------------|
| <b>Definition</b>                 | Patients designated as a trauma case with a BP < 90 mmHg                                         |
| <b>Category</b>                   | Clinical                                                                                         |
| <b>Subcategory</b>                | Trauma                                                                                           |
| <b>Measure Type</b>               | Process                                                                                          |
| <b>Target Population</b>          | Adult patients<br>Paediatric patients<br>Trauma patients                                         |
| <b>Unit of Analysis</b>           | Clinician<br>Shift<br>Base<br>Service                                                            |
| <b>Numerator Statement</b>        | Total number of patients designated as a trauma case with a BP < 90 mmHg                         |
| <b>Denominator Statement</b>      | Total number of patients designated as trauma                                                    |
| <b>Case Mix/Risk Adjustment</b>   | Adult patients<br>Paediatric patients<br>Primary (Community) calls<br>Secondary (Transfer) calls |
| <b>Exclusion Criteria</b>         | Medical patients (i.e.: Non-trauma patients)<br>Insufficient reporting data                      |
| <b>Measure Calculation</b>        | Numerator/Denominator X 100 = %                                                                  |
| <b>Numerical Reporting Format</b> | Percentage (%)                                                                                   |
| <b>Graphical Reporting Format</b> | Run chart (min 10 data points)<br>SPC chart (min 20 data points)                                 |
| <b>Reported Indicator</b>         | % Patients designated as a trauma case with a BP < 90 mmHg                                       |
| <b>Data Source</b>                | Patient Report Form<br>Trauma registry                                                           |
| <b>Suggested Reporting Period</b> | Monthly<br>Quarterly<br>Annually                                                                 |
| <b>Recommended Review Period</b>  | Three years                                                                                      |

### C-Tr-P-3 Patients designated as a trauma case with partial/full amputation who had a tourniquet applied

| Measure Code                      | C-Tr-P-3                                                                                                       |
|-----------------------------------|----------------------------------------------------------------------------------------------------------------|
| <b>Definition</b>                 | Patients designated as a trauma case with partial/full amputation who had a tourniquet applied                 |
| <b>Category</b>                   | Clinical                                                                                                       |
| <b>Subcategory</b>                | Trauma                                                                                                         |
| <b>Measure Type</b>               | Process                                                                                                        |
| <b>Target Population</b>          | Adult patients<br>Paediatric patients<br>Trauma patients                                                       |
| <b>Unit of Analysis</b>           | Clinician<br>Shift<br>Base<br>Service                                                                          |
| <b>Numerator Statement</b>        | Total number of patients designated as a trauma case with partial/full amputation who had a tourniquet applied |
| <b>Denominator Statement</b>      | Total number of patients designated as trauma with partial/full amputation                                     |
| <b>Case Mix/Risk Adjustment</b>   | Adult patients<br>Paediatric patients<br>Primary (Community) calls<br>Secondary (Transfer) calls               |
| <b>Exclusion Criteria</b>         | Medical patients (i.e.: Non-trauma patients)<br>Insufficient reporting data                                    |
| <b>Measure Calculation</b>        | Numerator/Denominator X 100 = %                                                                                |
| <b>Numerical Reporting Format</b> | Percentage (%)                                                                                                 |
| <b>Graphical Reporting Format</b> | Run chart (min 10 data points)<br>SPC chart (min 20 data points)                                               |
| <b>Reported Indicator</b>         | % Patients designated as a trauma case with partial/full amputation who had a tourniquet applied               |
| <b>Data Source</b>                | Patient Report Form<br>Trauma registry                                                                         |
| <b>Suggested Reporting Period</b> | Monthly<br>Quarterly<br>Annually                                                                               |
| <b>Recommended Review Period</b>  | Three years                                                                                                    |

## C-Tr-P-4 Patients designated as a trauma case with a femur fracture and traction splint use

| Measure Code                      | C-Tr-P-4                                                                                           |
|-----------------------------------|----------------------------------------------------------------------------------------------------|
| <b>Definition</b>                 | Patients designated as a trauma case with a femur fracture and traction splint use                 |
| <b>Category</b>                   | Clinical                                                                                           |
| <b>Subcategory</b>                | Trauma                                                                                             |
| <b>Measure Type</b>               | Process                                                                                            |
| <b>Target Population</b>          | Adult patients<br>Paediatric patients<br>Trauma patients                                           |
| <b>Unit of Analysis</b>           | Clinician<br>Shift<br>Base<br>Service                                                              |
| <b>Numerator Statement</b>        | Total number of patients designated as a trauma case with a femur fracture and traction splint use |
| <b>Denominator Statement</b>      | Total number of patients designated as trauma with a femur fracture                                |
| <b>Case Mix/Risk Adjustment</b>   | Adult patients<br>Paediatric patients<br>Primary (Community) calls<br>Secondary (Transfer) calls   |
| <b>Exclusion Criteria</b>         | Medical patients (i.e.: Non-trauma patients)<br>Insufficient reporting data                        |
| <b>Measure Calculation</b>        | Numerator/Denominator X 100 = %                                                                    |
| <b>Numerical Reporting Format</b> | Percentage (%)                                                                                     |
| <b>Graphical Reporting Format</b> | Run chart (min 10 data points)<br>SPC chart (min 20 data points)                                   |
| <b>Reported Indicator</b>         | % Patients designated as a trauma case with a femur fracture and traction splint use               |
| <b>Data Source</b>                | Patient Report Form<br>Trauma registry                                                             |
| <b>Suggested Reporting Period</b> | Monthly<br>Quarterly<br>Annually                                                                   |
| <b>Recommended Review Period</b>  | Three years                                                                                        |

## C-Tr-P-5 Patients designated as a trauma case with a BP < 90 mmHg who were administered TXA

| Measure Code                      | C-Tr-P-5                                                                                                              |
|-----------------------------------|-----------------------------------------------------------------------------------------------------------------------|
| <b>Definition</b>                 | Patients designated as a trauma case with a BP < 90 mmHg who were administered TXA                                    |
| <b>Category</b>                   | Clinical                                                                                                              |
| <b>Subcategory</b>                | Trauma                                                                                                                |
| <b>Measure Type</b>               | Process                                                                                                               |
| <b>Target Population</b>          | Adult patients<br>Paediatric patients<br>Trauma patients                                                              |
| <b>Unit of Analysis</b>           | Clinician<br>Shift<br>Base<br>Service                                                                                 |
| <b>Numerator Statement</b>        | Total number of patients designated as a trauma case with a BP < 90 mmHg who were administered TXA                    |
| <b>Denominator Statement</b>      | Total number of patients designated as a trauma case with a BP < 90 mmHg                                              |
| <b>Case Mix/Risk Adjustment</b>   | Adult patients<br>Paediatric patients<br>Primary (Community) calls<br>Secondary (Transfer) calls                      |
| <b>Exclusion Criteria</b>         | Medical patients (i.e.: Non-trauma patients)<br>Insufficient reporting data<br>Contraindication to TXA administration |
| <b>Measure Calculation</b>        | Numerator/Denominator X 100 = %                                                                                       |
| <b>Numerical Reporting Format</b> | Percentage (%)                                                                                                        |
| <b>Graphical Reporting Format</b> | Run chart (min 10 data points)<br>SPC chart (min 20 data points)                                                      |
| <b>Reported Indicator</b>         | % Patients designated as a trauma case with a BP < 90 mmHg who were administered TXA                                  |
| <b>Data Source</b>                | Patient Report Form<br>Trauma registry                                                                                |
| <b>Suggested Reporting Period</b> | Monthly<br>Quarterly<br>Annually                                                                                      |
| <b>Recommended Review Period</b>  | Three years                                                                                                           |

## C-Tr-P-6 Patients designated as a trauma case with direct transportation to a specialist Trauma Centre

| Measure Code                      | C-Tr-P-6                                                                                                      |
|-----------------------------------|---------------------------------------------------------------------------------------------------------------|
| <b>Definition</b>                 | Patients designated as a trauma case with direct transportation to a specialist Trauma Centre                 |
| <b>Category</b>                   | Clinical                                                                                                      |
| <b>Subcategory</b>                | Trauma                                                                                                        |
| <b>Measure Type</b>               | Process                                                                                                       |
| <b>Target Population</b>          | Adult patients<br>Paediatric patients<br>Trauma patients                                                      |
| <b>Unit of Analysis</b>           | Shift<br>Base<br>Service                                                                                      |
| <b>Numerator Statement</b>        | Total number of patients designated as a trauma case with direct transportation to a specialist Trauma Centre |
| <b>Denominator Statement</b>      | Total number of patients designated as trauma                                                                 |
| <b>Case Mix/Risk Adjustment</b>   | Adult patients<br>Paediatric patients<br>Primary (Community) calls<br>Secondary (Transfer) calls              |
| <b>Exclusion Criteria</b>         | Medical patients (i.e.: Non-trauma patients)<br>Insufficient reporting data                                   |
| <b>Measure Calculation</b>        | Numerator/Denominator X 100 = %                                                                               |
| <b>Numerical Reporting Format</b> | Percentage (%)                                                                                                |
| <b>Graphical Reporting Format</b> | Run chart (min 10 data points)<br>SPC chart (min 20 data points)                                              |
| <b>Reported Indicator</b>         | % Patients designated as a trauma case with direct transportation to a specialist Trauma Centre               |
| <b>Data Source</b>                | Patient Report Form<br>Trauma registry                                                                        |
| <b>Suggested Reporting Period</b> | Monthly<br>Quarterly<br>Annually                                                                              |
| <b>Recommended Review Period</b>  | Three years                                                                                                   |

## **Section 2: Non-clinical Category**

Part 1: Adverse/Sentinel Events

Part 2: Communications

## **Section 2: Non-clinical Category**

### **Part 1: Adverse/Sentinel Events**

- N-ASE-SE-1    Number of defined patient deaths while in EMS care per 10000 patient encounters
- N-ASE-SE-2    Number of defined Adverse Events reported during EMS care
- N-ASE-SE-3    Number of defined equipment/technical failures reported during EMS care
- N-ASE-SE-4    Number of accidental or unexpected extubations reported during EMS care
- N-ASE-SE-5    Number of patients with a decrease in GCS of 3 or more points during EMS care
- N-ASE-SE-6    Number of defined failed intubation attempts
- N-ASE-SE-7    Total number of patient injury reports during EMS care
- N-ASE-SE-8    Number of EMS staff on-duty injury reports
- N-ASE-SE-9    Number of defined medication errors during EMS care



## N-ASE-SE-1 Number of defined patient deaths while in EMS care per 10000 patient encounters

| Measure Code                      | N-ASE-SE-1                                                                                                                              |
|-----------------------------------|-----------------------------------------------------------------------------------------------------------------------------------------|
| <b>Definition</b>                 | Number of defined patient deaths while in EMS care per 10000 patient encounters                                                         |
| <b>Category</b>                   | Non-Clinical                                                                                                                            |
| <b>Subcategory</b>                | Adverse/Sentinel Event                                                                                                                  |
| <b>Measure Type</b>               | Sentinel event                                                                                                                          |
| <b>Target Population</b>          | Adult patients<br>Paediatric patients<br>Medical patients<br>Trauma patients                                                            |
| <b>Unit of Analysis</b>           | Clinician<br>Shift<br>Base<br>Service                                                                                                   |
| <b>Numerator Statement</b>        | Total number of patient deaths while in EMS care                                                                                        |
| <b>Denominator Statement</b>      | Total number patients treated and/or transported by EMS                                                                                 |
| <b>Case Mix/Risk Adjustment</b>   | Adult patients<br>Paediatric patients<br>Medical patients<br>Trauma patients<br>Primary (Community) calls<br>Secondary (Transfer) calls |
| <b>Exclusion Criteria</b>         | Patients declared dead on arrival of EMS<br>Insufficient reporting data                                                                 |
| <b>Measure Calculation</b>        | Numerator/Denominator X 10000                                                                                                           |
| <b>Numerical Reporting Format</b> | Per 10000 patient encounters                                                                                                            |
| <b>Graphical Reporting Format</b> | Run chart (min 10 data points)<br>SPC chart (min 20 data points)                                                                        |
| <b>Reported Indicator</b>         | Deaths per 1000 patient encounters                                                                                                      |
| <b>Data Source</b>                | Patient Report Form<br>Death in Care Register                                                                                           |
| <b>Suggested Reporting Period</b> | Monthly<br>Quarterly<br>Annually                                                                                                        |
| <b>Recommended Review Period</b>  | Three years                                                                                                                             |

## N-ASE-SE-2 Number of defined Adverse Events reported during EMS care

| Measure Code                      | N-ASE-SE-2                                                                                                                              |
|-----------------------------------|-----------------------------------------------------------------------------------------------------------------------------------------|
| <b>Definition</b>                 | Number of defined Adverse Events reported during EMS care                                                                               |
| <b>Category</b>                   | Non-Clinical                                                                                                                            |
| <b>Subcategory</b>                | Adverse/Sentinel Event                                                                                                                  |
| <b>Measure Type</b>               | Sentinel event                                                                                                                          |
| <b>Target Population</b>          | Adult patients<br>Paediatric patients<br>Medical patients<br>Trauma patients                                                            |
| <b>Unit of Analysis</b>           | Clinician<br>Shift<br>Base<br>Service                                                                                                   |
| <b>Numerator Statement</b>        | Total number of defined Adverse Events reported during EMS care                                                                         |
| <b>Denominator Statement</b>      | Total number patients treated and/or transported by EMS                                                                                 |
| <b>Case Mix/Risk Adjustment</b>   | Adult patients<br>Paediatric patients<br>Medical patients<br>Trauma patients<br>Primary (Community) calls<br>Secondary (Transfer) calls |
| <b>Exclusion Criteria</b>         | Insufficient reporting data                                                                                                             |
| <b>Measure Calculation</b>        | Numerator/Denominator X 1000                                                                                                            |
| <b>Numerical Reporting Format</b> | Per 1000 patient encounters                                                                                                             |
| <b>Graphical Reporting Format</b> | Run chart (min 10 data points)<br>SPC chart (min 20 data points)                                                                        |
| <b>Reported Indicator</b>         | Adverse Event rate per 1000 patient encounters                                                                                          |
| <b>Data Source</b>                | Patient Report Form<br>Adverse Event Register<br>Trigger Tool                                                                           |
| <b>Suggested Reporting Period</b> | Monthly<br>Quarterly<br>Annually                                                                                                        |
| <b>Recommended Review Period</b>  | Three years                                                                                                                             |

### N-ASE-SE-3 Number of defined equipment/technical failures reported during EMS care

| Measure Code                      | N-ASE-SE-3                                                                                                                              |
|-----------------------------------|-----------------------------------------------------------------------------------------------------------------------------------------|
| <b>Definition</b>                 | Number of defined equipment/technical failures reported during EMS care                                                                 |
| <b>Category</b>                   | Non-Clinical                                                                                                                            |
| <b>Subcategory</b>                | Adverse/Sentinel Event                                                                                                                  |
| <b>Measure Type</b>               | Sentinel event                                                                                                                          |
| <b>Target Population</b>          | Adult patients<br>Paediatric patients<br>Medical patients<br>Trauma patients                                                            |
| <b>Unit of Analysis</b>           | Shift<br>Base<br>Service                                                                                                                |
| <b>Numerator Statement</b>        | Total number of defined equipment/technical failures reported during EMS care                                                           |
| <b>Denominator Statement</b>      | Total number patients treated and/or transported by EMS                                                                                 |
| <b>Case Mix/Risk Adjustment</b>   | Adult patients<br>Paediatric patients<br>Medical patients<br>Trauma patients<br>Primary (Community) calls<br>Secondary (Transfer) calls |
| <b>Exclusion Criteria</b>         | Insufficient reporting data                                                                                                             |
| <b>Measure Calculation</b>        | Numerator/Denominator X 1000                                                                                                            |
| <b>Numerical Reporting Format</b> | Per 1000 patient encounters                                                                                                             |
| <b>Graphical Reporting Format</b> | Run chart (min 10 data points)<br>SPC chart (min 20 data points)                                                                        |
| <b>Reported Indicator</b>         | Equipment/technical failure rate per 1000 patient encounters                                                                            |
| <b>Data Source</b>                | Patient Report Form<br>Adverse Event Register                                                                                           |
| <b>Suggested Reporting Period</b> | Monthly<br>Quarterly<br>Annually                                                                                                        |
| <b>Recommended Review Period</b>  | Three years                                                                                                                             |

## N-ASE-SE-4 Number of accidental or unexpected extubations reported during EMS care

| Measure Code                      | N-ASE-SE-4                                                                                                                              |
|-----------------------------------|-----------------------------------------------------------------------------------------------------------------------------------------|
| <b>Definition</b>                 | Number of accidental or unexpected extubations reported during EMS care                                                                 |
| <b>Category</b>                   | Non-Clinical                                                                                                                            |
| <b>Subcategory</b>                | Adverse/Sentinel Event                                                                                                                  |
| <b>Measure Type</b>               | Sentinel event                                                                                                                          |
| <b>Target Population</b>          | Adult patients<br>Paediatric patients<br>Medical patients<br>Trauma patients                                                            |
| <b>Unit of Analysis</b>           | Clinician<br>Shift<br>Base<br>Service                                                                                                   |
| <b>Numerator Statement</b>        | Total number of accidental or unexpected extubations reported during EMS care                                                           |
| <b>Denominator Statement</b>      | Total number of intubated patients where intubation was initiated by and/or maintained by EMS                                           |
| <b>Case Mix/Risk Adjustment</b>   | Adult patients<br>Paediatric patients<br>Medical patients<br>Trauma patients<br>Primary (Community) calls<br>Secondary (Transfer) calls |
| <b>Exclusion Criteria</b>         | Insufficient reporting data                                                                                                             |
| <b>Measure Calculation</b>        | Numerator/Denominator X 100 = %                                                                                                         |
| <b>Numerical Reporting Format</b> | Percentage (%)                                                                                                                          |
| <b>Graphical Reporting Format</b> | Run chart (min 10 data points)<br>SPC chart (min 20 data points)                                                                        |
| <b>Reported Indicator</b>         | % Accidental or unexpected extubations reported during EMS care                                                                         |
| <b>Data Source</b>                | Patient Report Form<br>Airway Register                                                                                                  |
| <b>Suggested Reporting Period</b> | Monthly<br>Quarterly<br>Annually                                                                                                        |
| <b>Recommended Review Period</b>  | Three years                                                                                                                             |

## N-ASE-SE-5 Number of patients with a decrease in GCS of 3 or more points during EMS care

| Measure Code                      | N-ASE-SE-5                                                                                                                              |
|-----------------------------------|-----------------------------------------------------------------------------------------------------------------------------------------|
| <b>Definition</b>                 | Number of patients with a decrease in GCS of 3 or more points during EMS care                                                           |
| <b>Category</b>                   | Non-Clinical                                                                                                                            |
| <b>Subcategory</b>                | Adverse/Sentinel Event                                                                                                                  |
| <b>Measure Type</b>               | Sentinel event                                                                                                                          |
| <b>Target Population</b>          | Adult patients<br>Paediatric patients<br>Medical patients<br>Trauma patients                                                            |
| <b>Unit of Analysis</b>           | Clinician<br>Shift<br>Base<br>Service                                                                                                   |
| <b>Numerator Statement</b>        | Total number of patients with a decrease in GCS of 3 or more points during EMS care                                                     |
| <b>Denominator Statement</b>      | Total number patients treated and/or transported by EMS                                                                                 |
| <b>Case Mix/Risk Adjustment</b>   | Adult patients<br>Paediatric patients<br>Medical patients<br>Trauma patients<br>Primary (Community) calls<br>Secondary (Transfer) calls |
| <b>Exclusion Criteria</b>         | Insufficient reporting data                                                                                                             |
| <b>Measure Calculation</b>        | Numerator/Denominator X 100 = %                                                                                                         |
| <b>Numerical Reporting Format</b> | Percentage (%)                                                                                                                          |
| <b>Graphical Reporting Format</b> | Run chart (min 10 data points)<br>SPC chart (min 20 data points)                                                                        |
| <b>Reported Indicator</b>         | % Patients with a decrease in GCS of 3 or more points during EMS care                                                                   |
| <b>Data Source</b>                | Patient Report Form                                                                                                                     |
| <b>Suggested Reporting Period</b> | Monthly<br>Quarterly<br>Annually                                                                                                        |
| <b>Recommended Review Period</b>  | Three years                                                                                                                             |

## N-ASE-SE-6 Number of defined failed intubation attempts

| Measure Code                      | N-ASE-SE-6                                                                                                                              |
|-----------------------------------|-----------------------------------------------------------------------------------------------------------------------------------------|
| <b>Definition</b>                 | Number of defined failed intubation attempts                                                                                            |
| <b>Category</b>                   | Non-Clinical                                                                                                                            |
| <b>Subcategory</b>                | Adverse/Sentinel Event                                                                                                                  |
| <b>Measure Type</b>               | Sentinel event                                                                                                                          |
| <b>Target Population</b>          | Adult patients<br>Paediatric patients<br>Medical patients<br>Trauma patients                                                            |
| <b>Unit of Analysis</b>           | Clinician<br>Shift<br>Base<br>Service                                                                                                   |
| <b>Numerator Statement</b>        | Total number of defined failed intubation attempts                                                                                      |
| <b>Denominator Statement</b>      | Total number of intubated patients where Intubation was attempted by EMS personnel                                                      |
| <b>Case Mix/Risk Adjustment</b>   | Adult patients<br>Paediatric patients<br>Medical patients<br>Trauma patients<br>Primary (Community) calls<br>Secondary (Transfer) calls |
| <b>Exclusion Criteria</b>         | Insufficient reporting data                                                                                                             |
| <b>Measure Calculation</b>        | Numerator/Denominator X 100 = %                                                                                                         |
| <b>Numerical Reporting Format</b> | Percentage (%)                                                                                                                          |
| <b>Graphical Reporting Format</b> | Run chart (min 10 data points)<br>SPC chart (min 20 data points)                                                                        |
| <b>Reported Indicator</b>         | % Failed intubation attempts                                                                                                            |
| <b>Data Source</b>                | Patient Report Form<br>Airway Register                                                                                                  |
| <b>Suggested Reporting Period</b> | Monthly<br>Quarterly<br>Annually                                                                                                        |
| <b>Recommended Review Period</b>  | Three years                                                                                                                             |

## N-ASE-SE-7 Total number of patient injury reports during EMS care

| Measure Code                      | N-ASE-SE-7                                                                                                                              |
|-----------------------------------|-----------------------------------------------------------------------------------------------------------------------------------------|
| <b>Definition</b>                 | Total number of patient injury reports during EMS care                                                                                  |
| <b>Category</b>                   | Non-Clinical                                                                                                                            |
| <b>Subcategory</b>                | Adverse/Sentinel Event                                                                                                                  |
| <b>Measure Type</b>               | Sentinel event                                                                                                                          |
| <b>Target Population</b>          | Adult patients<br>Paediatric patients<br>Medical patients<br>Trauma patients                                                            |
| <b>Unit of Analysis</b>           | Clinician<br>Shift<br>Base<br>Service                                                                                                   |
| <b>Numerator Statement</b>        | Total number of patient injury reports during EMS care                                                                                  |
| <b>Denominator Statement</b>      | Total number patients treated and/or transported by EMS                                                                                 |
| <b>Case Mix/Risk Adjustment</b>   | Adult patients<br>Paediatric patients<br>Medical patients<br>Trauma patients<br>Primary (Community) calls<br>Secondary (Transfer) calls |
| <b>Exclusion Criteria</b>         | Insufficient reporting data                                                                                                             |
| <b>Measure Calculation</b>        | Numerator/Denominator X 1000                                                                                                            |
| <b>Numerical Reporting Format</b> | Per 1000 patient encounters                                                                                                             |
| <b>Graphical Reporting Format</b> | Run chart (min 10 data points)<br>SPC chart (min 20 data points)                                                                        |
| <b>Reported Indicator</b>         | Patient injuries per 1000 patient encounters                                                                                            |
| <b>Data Source</b>                | Patient Report Form<br>Adverse Event Register                                                                                           |
| <b>Suggested Reporting Period</b> | Monthly<br>Quarterly<br>Annually                                                                                                        |
| <b>Recommended Review Period</b>  | Three years                                                                                                                             |

## N-ASE-SE-8 Number of EMS staff on-duty injury reports

| Measure Code                      | N-ASE-SE-8                                                                                                                              |
|-----------------------------------|-----------------------------------------------------------------------------------------------------------------------------------------|
| <b>Definition</b>                 | Number of EMS staff on-duty injury reports                                                                                              |
| <b>Category</b>                   | Non-Clinical                                                                                                                            |
| <b>Subcategory</b>                | Adverse/Sentinel Event                                                                                                                  |
| <b>Measure Type</b>               | Sentinel event                                                                                                                          |
| <b>Target Population</b>          | Adult patients<br>Paediatric patients<br>Medical patients<br>Trauma patients                                                            |
| <b>Unit of Analysis</b>           | Clinician<br>Shift<br>Base<br>Service                                                                                                   |
| <b>Numerator Statement</b>        | Total number of EMS staff on-duty injury reports                                                                                        |
| <b>Denominator Statement</b>      | Total number patients treated and/or transported by EMS                                                                                 |
| <b>Case Mix/Risk Adjustment</b>   | Adult patients<br>Paediatric patients<br>Medical patients<br>Trauma patients<br>Primary (Community) calls<br>Secondary (Transfer) calls |
| <b>Exclusion Criteria</b>         | Insufficient reporting data                                                                                                             |
| <b>Measure Calculation</b>        | Numerator/Denominator X 1000                                                                                                            |
| <b>Numerical Reporting Format</b> | Per 1000 patient encounters                                                                                                             |
| <b>Graphical Reporting Format</b> | Run chart (min 10 data points)<br>SPC chart (min 20 data points)                                                                        |
| <b>Reported Indicator</b>         | EMS staff on-duty injuries per 1000 patient encounters                                                                                  |
| <b>Data Source</b>                | Patient Report Form<br>Adverse Event Register<br>IOD Reports                                                                            |
| <b>Suggested Reporting Period</b> | Monthly<br>Quarterly<br>Annually                                                                                                        |
| <b>Recommended Review Period</b>  | Three years                                                                                                                             |



## N-ASE-SE-9 Number of defined medication errors during EMS care

| Measure Code                      | N-ASE-SE-9                                                                                                                              |
|-----------------------------------|-----------------------------------------------------------------------------------------------------------------------------------------|
| <b>Definition</b>                 | Number of defined medication errors during EMS care                                                                                     |
| <b>Category</b>                   | Non-Clinical                                                                                                                            |
| <b>Subcategory</b>                | Adverse/Sentinel Event                                                                                                                  |
| <b>Measure Type</b>               | Sentinel event                                                                                                                          |
| <b>Target Population</b>          | Adult patients<br>Paediatric patients<br>Medical patients<br>Trauma patients                                                            |
| <b>Unit of Analysis</b>           | Clinician<br>Shift<br>Base<br>Service                                                                                                   |
| <b>Numerator Statement</b>        | Total number of defined medication errors during EMS care                                                                               |
| <b>Denominator Statement</b>      | Total number patients treated and/or transported by EMS                                                                                 |
| <b>Case Mix/Risk Adjustment</b>   | Adult patients<br>Paediatric patients<br>Medical patients<br>Trauma patients<br>Primary (Community) calls<br>Secondary (Transfer) calls |
| <b>Exclusion Criteria</b>         | Insufficient reporting data                                                                                                             |
| <b>Measure Calculation</b>        | Numerator/Denominator X 1000                                                                                                            |
| <b>Numerical Reporting Format</b> | Per 1000 patient encounters                                                                                                             |
| <b>Graphical Reporting Format</b> | Run chart (min 10 data points)<br>SPC chart (min 20 data points)                                                                        |
| <b>Reported Indicator</b>         | Medication errors per 1000 patient encounters                                                                                           |
| <b>Data Source</b>                | Patient Report Form<br>Adverse Event Register                                                                                           |
| <b>Suggested Reporting Period</b> | Monthly<br>Quarterly<br>Annually                                                                                                        |
| <b>Recommended Review Period</b>  | Three years                                                                                                                             |

## Section 2: Non-clinical Category

### Part 2: Communications

- N-CD-S-1 Number of cases compliant with defined ALS Dispatch criteria
- N-CD-S-2 Number of cases with call processing time within defined limits
- N-CD-S-4 Number of Service Call Centre calls received per defined time period
- N-CD-S-5 Number of Service Call Centre calls received per 10000 population
- N-CD-S-6 Number of unanswered/missed calls to the Service Call Centre
- N-CD-P-1 Number of Cases with a delay in dispatch and/or response time waiting for a police/security escort

## N-CD-S-1 Number of cases compliant with defined ALS Dispatch criteria

| Measure Code                      | N-CD-S-1                                                                                                                                                                       |
|-----------------------------------|--------------------------------------------------------------------------------------------------------------------------------------------------------------------------------|
| <b>Definition</b>                 | Number of cases compliant with defined ALS Dispatch criteria                                                                                                                   |
| <b>Category</b>                   | Non-clinical                                                                                                                                                                   |
| <b>Subcategory</b>                | Communications/Dispatch                                                                                                                                                        |
| <b>Measure Type</b>               | Structure                                                                                                                                                                      |
| <b>Target Population</b>          | Adult patients<br>Paediatric patients<br>Medical patients<br>Trauma patients                                                                                                   |
| <b>Unit of Analysis</b>           | Call Centre staff<br>Shift<br>Service                                                                                                                                          |
| <b>Numerator Statement</b>        | Total number of cases compliant with defined ALS Dispatch criteria                                                                                                             |
| <b>Denominator Statement</b>      | Total number of cases with ALS Dispatch                                                                                                                                        |
| <b>Case Mix/Risk Adjustment</b>   | Adult patients<br>Paediatric patients<br>Medical patients<br>Trauma patients<br>Primary (Community) calls<br>Secondary (Transfer) calls<br>Completed cases<br>Stood down cases |
| <b>Exclusion Criteria</b>         | Insufficient reporting data                                                                                                                                                    |
| <b>Measure Calculation</b>        | Numerator/Denominator X 100 = %                                                                                                                                                |
| <b>Numerical Reporting Format</b> | Percentage (%)                                                                                                                                                                 |
| <b>Graphical Reporting Format</b> | Run chart (min 10 data points)<br>SPC chart (min 20 data points)                                                                                                               |
| <b>Reported Indicator</b>         | % Cases compliant with defined ALS Dispatch criteria                                                                                                                           |
| <b>Data Source</b>                | Patient Report Form                                                                                                                                                            |
| <b>Suggested Reporting Period</b> | Monthly<br>Quarterly<br>Annually                                                                                                                                               |
| <b>Recommended Review Period</b>  | Three years                                                                                                                                                                    |

## N-CD-S-2 Number of cases with call processing time within defined limits

| Measure Code                      | N-CD-S-2                                                                                                                                                                       |
|-----------------------------------|--------------------------------------------------------------------------------------------------------------------------------------------------------------------------------|
| <b>Definition</b>                 | Number of cases with call processing time within defined limits                                                                                                                |
| <b>Category</b>                   | Non-clinical                                                                                                                                                                   |
| <b>Subcategory</b>                | Communications/Dispatch                                                                                                                                                        |
| <b>Measure Type</b>               | Structure                                                                                                                                                                      |
| <b>Target Population</b>          | Adult patients<br>Paediatric patients<br>Medical patients<br>Trauma patients                                                                                                   |
| <b>Unit of Analysis</b>           | Call Centre staff<br>Shift<br>Service                                                                                                                                          |
| <b>Numerator Statement</b>        | Total number of cases with call processing time within defined limits                                                                                                          |
| <b>Denominator Statement</b>      | Total number of calls to the Service Call Centre                                                                                                                               |
| <b>Case Mix/Risk Adjustment</b>   | Adult patients<br>Paediatric patients<br>Medical patients<br>Trauma patients<br>Primary (Community) calls<br>Secondary (Transfer) calls<br>Completed cases<br>Stood down cases |
| <b>Exclusion Criteria</b>         | Insufficient reporting data                                                                                                                                                    |
| <b>Measure Calculation</b>        | Numerator/Denominator X 100 = %                                                                                                                                                |
| <b>Numerical Reporting Format</b> | Percentage (%)                                                                                                                                                                 |
| <b>Graphical Reporting Format</b> | Run chart (min 10 data points)<br>SPC chart (min 20 data points)                                                                                                               |
| <b>Reported Indicator</b>         | % Cases with call processing time within defined limits                                                                                                                        |
| <b>Data Source</b>                | Patient Report Form                                                                                                                                                            |
| <b>Suggested Reporting Period</b> | Monthly<br>Quarterly<br>Annually                                                                                                                                               |
| <b>Recommended Review Period</b>  | Three years                                                                                                                                                                    |

## N-CD-S-4 Number of Service Call Centre calls received per defined time period

| Measure Code                      | N-CD-S-4                                                                                                                                |
|-----------------------------------|-----------------------------------------------------------------------------------------------------------------------------------------|
| <b>Definition</b>                 | Number of Service Call Centre calls received per defined time period                                                                    |
| <b>Category</b>                   | Non-clinical                                                                                                                            |
| <b>Subcategory</b>                | Communications/Dispatch                                                                                                                 |
| <b>Measure Type</b>               | Structure                                                                                                                               |
| <b>Target Population</b>          | Adult patients<br>Paediatric patients<br>Medical patients<br>Trauma patients                                                            |
| <b>Unit of Analysis</b>           | Call Centre staff<br>Shift<br>Service                                                                                                   |
| <b>Numerator Statement</b>        | Total number of Service Call Centre calls received per defined time period                                                              |
| <b>Denominator Statement</b>      | N/A                                                                                                                                     |
| <b>Case Mix/Risk Adjustment</b>   | Adult patients<br>Paediatric patients<br>Medical patients<br>Trauma patients<br>Primary (Community) calls<br>Secondary (Transfer) calls |
| <b>Exclusion Criteria</b>         | Insufficient reporting data                                                                                                             |
| <b>Measure Calculation</b>        | Numerator                                                                                                                               |
| <b>Numerical Reporting Format</b> | Number                                                                                                                                  |
| <b>Graphical Reporting Format</b> | Run chart (min 10 data points)<br>SPC chart (min 20 data points)                                                                        |
| <b>Reported Indicator</b>         | Number of Service Call Centre calls received per defined time period                                                                    |
| <b>Data Source</b>                | Service Call Centre data                                                                                                                |
| <b>Suggested Reporting Period</b> | Monthly<br>Quarterly<br>Annually                                                                                                        |
| <b>Recommended Review Period</b>  | Three years                                                                                                                             |

## N-CD-S-5 Number of Service Call Centre calls received per 10000 population

| Measure Code                      | N-CD-S-5                                                                                                                                |
|-----------------------------------|-----------------------------------------------------------------------------------------------------------------------------------------|
| <b>Definition</b>                 | Number of Service Call Centre calls received per 10000 population                                                                       |
| <b>Category</b>                   | Non-clinical                                                                                                                            |
| <b>Subcategory</b>                | Communications/Dispatch                                                                                                                 |
| <b>Measure Type</b>               | Structure                                                                                                                               |
| <b>Target Population</b>          | Adult patients<br>Paediatric patients<br>Medical patients<br>Trauma patients                                                            |
| <b>Unit of Analysis</b>           | Call Centre staff<br>Shift<br>Service                                                                                                   |
| <b>Numerator Statement</b>        | Total number of Service Call Centre calls received per defined area and/or time period                                                  |
| <b>Denominator Statement</b>      | Total population per equivalent defined area                                                                                            |
| <b>Case Mix/Risk Adjustment</b>   | Adult patients<br>Paediatric patients<br>Medical patients<br>Trauma patients<br>Primary (Community) calls<br>Secondary (Transfer) calls |
| <b>Exclusion Criteria</b>         | Insufficient reporting data                                                                                                             |
| <b>Measure Calculation</b>        | Numerator/Denominator X 10000                                                                                                           |
| <b>Numerical Reporting Format</b> | Per 10,000 citizens                                                                                                                     |
| <b>Graphical Reporting Format</b> | Run chart (min 10 data points)<br>SPC chart (min 20 data points)                                                                        |
| <b>Reported Indicator</b>         | Service Call Centre calls received per 10000 population                                                                                 |
| <b>Data Source</b>                | Service Call Centre data                                                                                                                |
| <b>Suggested Reporting Period</b> | Monthly<br>Quarterly<br>Annually                                                                                                        |
| <b>Recommended Review Period</b>  | Three years                                                                                                                             |

## N-CD-S-6 Number of unanswered/missed calls to the Service Call Centre

| Measure Code                      | N-CD-S-6                                                                                                                                |
|-----------------------------------|-----------------------------------------------------------------------------------------------------------------------------------------|
| <b>Definition</b>                 | Number of unanswered/missed calls to the Service Call Centre                                                                            |
| <b>Category</b>                   | Non-clinical                                                                                                                            |
| <b>Subcategory</b>                | Communications/Dispatch                                                                                                                 |
| <b>Measure Type</b>               | Structure                                                                                                                               |
| <b>Target Population</b>          | Adult patients<br>Paediatric patients<br>Medical patients<br>Trauma patients                                                            |
| <b>Unit of Analysis</b>           | Call Centre staff<br>Shift<br>Service                                                                                                   |
| <b>Numerator Statement</b>        | Total number of unanswered/missed calls to the Service Call Centre                                                                      |
| <b>Denominator Statement</b>      | Total number of calls to the Service Call Centre                                                                                        |
| <b>Case Mix/Risk Adjustment</b>   | Adult patients<br>Paediatric patients<br>Medical patients<br>Trauma patients<br>Primary (Community) calls<br>Secondary (Transfer) calls |
| <b>Exclusion Criteria</b>         | Insufficient reporting data                                                                                                             |
| <b>Measure Calculation</b>        | Numerator/Denominator X 100 = %                                                                                                         |
| <b>Numerical Reporting Format</b> | Percentage (%)                                                                                                                          |
| <b>Graphical Reporting Format</b> | Run chart (min 10 data points)<br>SPC chart (min 20 data points)                                                                        |
| <b>Reported Indicator</b>         | % Calls to the Service Call Centre unanswered/missed                                                                                    |
| <b>Data Source</b>                | Patient Report Form                                                                                                                     |
| <b>Suggested Reporting Period</b> | Monthly<br>Quarterly<br>Annually                                                                                                        |
| <b>Recommended Review Period</b>  | Three years                                                                                                                             |

## N-CD-P-1 Number of Cases with a delay in dispatch and/or response time waiting for a police/security escort

| Measure Code                      | N-CD-P-1                                                                                                            |
|-----------------------------------|---------------------------------------------------------------------------------------------------------------------|
| <b>Definition</b>                 | Number of Cases with a delay in dispatch and/or response time waiting for a police/security escort                  |
| <b>Category</b>                   | Non-clinical                                                                                                        |
| <b>Subcategory</b>                | Communications/Dispatch                                                                                             |
| <b>Measure Type</b>               | Process                                                                                                             |
| <b>Target Population</b>          | Adult patients<br>Paediatric patients<br>Medical patients<br>Trauma patients                                        |
| <b>Unit of Analysis</b>           | Call Centre staff<br>Shift<br>Service                                                                               |
| <b>Numerator Statement</b>        | Total number of Cases with a delay in dispatch and/or response time waiting for a police/security escort            |
| <b>Denominator Statement</b>      | Total number patients treated and/or transported by EMS                                                             |
| <b>Case Mix/Risk Adjustment</b>   | Adult patients<br>Paediatric patients<br>Medical patients<br>Trauma patients<br>Completed cases<br>Stood down cases |
| <b>Exclusion Criteria</b>         | Insufficient reporting data                                                                                         |
| <b>Measure Calculation</b>        | Numerator/Denominator X 100 = %                                                                                     |
| <b>Numerical Reporting Format</b> | Percentage (%)                                                                                                      |
| <b>Graphical Reporting Format</b> | Run chart (min 10 data points)<br>SPC chart (min 20 data points)                                                    |
| <b>Reported Indicator</b>         | % Cases with a delay in dispatch and/or response time waiting for a police/security escort                          |
| <b>Data Source</b>                | Patient Report Form<br>Service Call Centre data                                                                     |
| <b>Suggested Reporting Period</b> | Monthly<br>Quarterly<br>Annually                                                                                    |
| <b>Recommended Review Period</b>  | Three years                                                                                                         |
